# Supplementary material
Source: publisher figshare collection journal article supplement (https://acs.figshare.com/ndownloader/files/3776794)
Supplement: Supplementary file 1 [file 3776794]

data_publication_text
_publ_requested_journal          Angew.Chem.,Int.Ed.
_publ_contact_author_name        'Kosuke Katagiri'
_publ_contact_author_address     
'8-9-1 Okamoto, Higashinada-ku, Kobe 658-8501, Japan'
_publ_contact_author_email       katagiri@center.konan-u.ac.jp
loop_
_publ_author_name
_publ_author_address
'Katagiri, Kosuke' '8-9-1 Okamoto, Higashinada-ku, Kobe 658-8501, Japan'
'Komagawa, Shinsuke' '1314-1 Shido, Sanuki, Kagawa 769-2193, Japan'
'Uchiyama, Masanobu' '7-3-1 Hongo, Bunkyo-ku, Tokyo 113-0033, Japan'
'Yamaguchi, Kentaro' '1314-1 Shido, Sanuki, Kagawa 769-2193, Japan'
'Azumaya, Isao' '2-2-1 Miyama, Funabashi, Chiba 274-8510, Japan'

 
data_compound1a 
 
_audit_creation_method            SHELXL-97 
_chemical_name_systematic 
; 
 ? 
; 
_chemical_name_common             ? 
_chemical_melting_point           ? 
_chemical_formula_moiety          ? 
_chemical_formula_sum 
 'C66 H60 Cl9 N6 O6 P3' 
_chemical_formula_weight          1445.16 
 
loop_ 
 _atom_type_symbol 
 _atom_type_description 
 _atom_type_scat_dispersion_real 
 _atom_type_scat_dispersion_imag 
 _atom_type_scat_source 
 'C'  'C'   0.0033   0.0016 
 'International Tables Vol C Tables 4.2.6.8 and 6.1.1.4' 
 'H'  'H'   0.0000   0.0000 
 'International Tables Vol C Tables 4.2.6.8 and 6.1.1.4' 
 'N'  'N'   0.0061   0.0033 
 'International Tables Vol C Tables 4.2.6.8 and 6.1.1.4' 
 'O'  'O'   0.0106   0.0060 
 'International Tables Vol C Tables 4.2.6.8 and 6.1.1.4' 
 'P'  'P'   0.1023   0.0942 
 'International Tables Vol C Tables 4.2.6.8 and 6.1.1.4' 
 'Cl'  'Cl'   0.1484   0.1585 
 'International Tables Vol C Tables 4.2.6.8 and 6.1.1.4' 
 
_symmetry_cell_setting           'Rhombohedral'
_symmetry_space_group_name_H-M   'R-3   '
loop_ 
 _symmetry_equiv_pos_as_xyz 
 'x, y, z' 
 '-y, x-y, z' 
 '-x+y, -x, z' 
 'x+2/3, y+1/3, z+1/3' 
 '-y+2/3, x-y+1/3, z+1/3' 
 '-x+y+2/3, -x+1/3, z+1/3' 
 'x+1/3, y+2/3, z+2/3' 
 '-y+1/3, x-y+2/3, z+2/3' 
 '-x+y+1/3, -x+2/3, z+2/3' 
 '-x, -y, -z' 
 'y, -x+y, -z' 
 'x-y, x, -z' 
 '-x+2/3, -y+1/3, -z+1/3' 
 'y+2/3, -x+y+1/3, -z+1/3' 
 'x-y+2/3, x+1/3, -z+1/3' 
 '-x+1/3, -y+2/3, -z+2/3' 
 'y+1/3, -x+y+2/3, -z+2/3' 
 'x-y+1/3, x+2/3, -z+2/3' 
 
_cell_length_a                    17.622(5) 
_cell_length_b                    17.622(5) 
_cell_length_c                    37.634(11) 
_cell_angle_alpha                 90.00 
_cell_angle_beta                  90.00 
_cell_angle_gamma                 120.00 
_cell_volume                      10121(5) 
_cell_formula_units_Z             6 
_cell_measurement_temperature     150 
_cell_measurement_reflns_used    3279
_cell_measurement_theta_min        2.31
_cell_measurement_theta_max       24.36
_exptl_crystal_description        'prismatic'
_exptl_crystal_colour             'colorless'
_exptl_crystal_size_max           0.20 
_exptl_crystal_size_mid           0.15 
_exptl_crystal_size_min           0.10 
_exptl_crystal_density_meas       ? 
_exptl_crystal_density_diffrn     1.423 
_exptl_crystal_density_method     'not measured' 
_exptl_crystal_F_000              4464 
_exptl_absorpt_coefficient_mu     0.500 
_exptl_absorpt_correction_type    empirical
_exptl_absorpt_correction_T_min   0.9065 
_exptl_absorpt_correction_T_max   0.9517 
_exptl_absorpt_process_details    
;
SADABS Sheldrick 1996
;
_exptl_special_details 
; 
 ? 
; 
 
_diffrn_ambient_temperature       150 
_diffrn_radiation_wavelength      0.71073 
_diffrn_radiation_type            MoK\a 
_diffrn_radiation_source          'sealed tube'
_diffrn_radiation_monochromator   'graphite'
_diffrn_measurement_device_type   'Bruker APEXII CCD area detector' 
_diffrn_measurement_method        'phi and omega scans' 
_diffrn_detector_area_resol_mean  8.333
_diffrn_standards_number          ? 
_diffrn_standards_interval_count  ? 
_diffrn_standards_interval_time   ? 
_diffrn_standards_decay_%         ? 
_diffrn_reflns_number             14289 
_diffrn_reflns_av_R_equivalents   0.0533 
_diffrn_reflns_av_sigmaI/netI     0.0525 
_diffrn_reflns_limit_h_min        -18 
_diffrn_reflns_limit_h_max        20 
_diffrn_reflns_limit_k_min        -18 
_diffrn_reflns_limit_k_max        20 
_diffrn_reflns_limit_l_min        -33 
_diffrn_reflns_limit_l_max        43 
_diffrn_reflns_theta_min          1.62 
_diffrn_reflns_theta_max          24.62 
_reflns_number_total              3792 
_reflns_number_gt                 2508 
_reflns_threshold_expression      >2sigma(I) 
 
_computing_data_collection        'APEX2 (Bruker AXS, 2006)'
_computing_cell_refinement        'APEX2 (Bruker AXS, 2006)'
_computing_data_reduction         'SAINT (Bruker AXS, 2004)'
_computing_structure_solution     'SHELXS-97 (Sheldrick, 1997)'
_computing_structure_refinement   'SHELXL-97 (Sheldrick, 1997)'
_computing_molecular_graphics     'XSHEL (Bruker AXS,2002)'
_computing_publication_material   'XCIF (Bruker AXS, 2001)' 
_refine_special_details 
; 
 Refinement of F^2^ against ALL reflections.  The weighted R-factor wR and 
 goodness of fit S are based on F^2^, conventional R-factors R are based 
 on F, with F set to zero for negative F^2^. The threshold expression of 
 F^2^ > 2sigma(F^2^) is used only for calculating R-factors(gt) etc. and is 
 not relevant to the choice of reflections for refinement.  R-factors based 
 on F^2^ are statistically about twice as large as those based on F, and R- 
 factors based on ALL data will be even larger. 
; 
 
_refine_ls_structure_factor_coef  Fsqd  
_refine_ls_matrix_type            full 
_refine_ls_weighting_scheme       calc  
_refine_ls_weighting_details 
 'calc w=1/[\s^2^(Fo^2^)+(0.0620P)^2^+44.4471P] where P=(Fo^2^+2Fc^2^)/3' 
_atom_sites_solution_primary      direct 
_atom_sites_solution_secondary    difmap 
_atom_sites_solution_hydrogens    geom 
_refine_ls_hydrogen_treatment     mixed
_refine_ls_extinction_method      none 
_refine_ls_extinction_coef        ? 
_refine_ls_number_reflns          3792 
_refine_ls_number_parameters      276 
_refine_ls_number_restraints      0 
_refine_ls_R_factor_all           0.0880 
_refine_ls_R_factor_gt            0.0459 
_refine_ls_wR_factor_ref          0.1465 
_refine_ls_wR_factor_gt           0.1168 
_refine_ls_goodness_of_fit_ref    1.042 
_refine_ls_restrained_S_all       1.042 
_refine_ls_shift/su_max           0.001 
_refine_ls_shift/su_mean          0.000 
 
loop_ 
 _atom_site_label 
 _atom_site_type_symbol 
 _atom_site_fract_x 
 _atom_site_fract_y 
 _atom_site_fract_z 
 _atom_site_U_iso_or_equiv 
 _atom_site_adp_type 
 _atom_site_occupancy 
 _atom_site_symmetry_multiplicity 
 _atom_site_calc_flag 
 _atom_site_refinement_flags 
 _atom_site_disorder_assembly 
 _atom_site_disorder_group 
Cl1 Cl 0.23545(9) 0.40427(11) 0.29625(4) 0.0733(5) Uani 1 1 d . . . 
Cl3 Cl 0.37073(10) 0.57186(9) 0.27048(3) 0.0649(4) Uani 1 1 d . . . 
Cl2 Cl 0.33991(8) 0.41333(10) 0.23570(3) 0.0607(4) Uani 1 1 d . . . 
O2 O 0.59990(16) 0.42896(16) 0.14154(6) 0.0278(6) Uani 1 1 d . . . 
P1 P 0.51442(6) 0.34657(6) 0.13952(2) 0.0239(2) Uani 1 1 d . . . 
C22 C 0.3392(3) 0.4609(3) 0.27645(11) 0.0450(11) Uani 1 1 d . . . 
H22 H 0.3825 0.4576 0.2926 0.054 Uiso 1 1 calc R . . 
C9 C 0.3480(3) 0.0072(3) 0.28168(11) 0.0414(11) Uani 1 1 d . . . 
H9A H 0.3347 0.0272 0.2595 0.062 Uiso 1 1 calc R . . 
H9B H 0.2945 -0.0239 0.2960 0.062 Uiso 1 1 calc R . . 
H9C H 0.3706 -0.0322 0.2763 0.062 Uiso 1 1 calc R . . 
C20 C 0.5318(3) 0.2994(3) 0.03587(10) 0.0397(11) Uani 1 1 d . . . 
H20 H 0.5677 0.3314 0.0163 0.048 Uiso 1 1 calc R . . 
C19 C 0.4642(3) 0.2155(3) 0.03079(10) 0.0418(11) Uani 1 1 d . . . 
H19 H 0.4534 0.1899 0.0078 0.050 Uiso 1 1 calc R . . 
C18 C 0.4118(3) 0.1678(3) 0.05904(10) 0.0410(11) Uani 1 1 d . . . 
H18 H 0.3654 0.1095 0.0555 0.049 Uiso 1 1 calc R . . 
C12 C 0.3707(3) 0.4654(3) 0.12833(10) 0.0360(10) Uani 1 1 d . . . 
H12 H 0.3795 0.5185 0.1181 0.043 Uiso 1 1 calc R . . 
C13 C 0.2905(3) 0.4066(3) 0.14289(10) 0.0368(10) Uani 1 1 d . . . 
H13 H 0.2439 0.4191 0.1427 0.044 Uiso 1 1 calc R . . 
C17 C 0.4276(3) 0.2057(3) 0.09253(10) 0.0338(9) Uani 1 1 d . . . 
H17 H 0.3915 0.1733 0.1120 0.041 Uiso 1 1 calc R . . 
C14 C 0.2783(3) 0.3295(3) 0.15771(10) 0.0342(10) Uani 1 1 d . . . 
H14 H 0.2231 0.2891 0.1677 0.041 Uiso 1 1 calc R . . 
C8 C 0.4162(2) 0.0856(2) 0.30226(10) 0.0300(9) Uani 1 1 d . . . 
H8A H 0.3913 0.1228 0.3092 0.036 Uiso 1 1 calc R . . 
H8B H 0.4309 0.0649 0.3243 0.036 Uiso 1 1 calc R . . 
C21 C 0.5483(3) 0.3383(3) 0.06906(10) 0.0329(9) Uani 1 1 d . . . 
H21 H 0.5948 0.3967 0.0722 0.039 Uiso 1 1 calc R . . 
C11 C 0.4379(3) 0.4468(3) 0.12867(10) 0.0294(9) Uani 1 1 d . . . 
H11 H 0.4929 0.4874 0.1186 0.035 Uiso 1 1 calc R . . 
C15 C 0.3455(2) 0.3109(2) 0.15812(9) 0.0276(8) Uani 1 1 d . . . 
H15 H 0.3364 0.2577 0.1684 0.033 Uiso 1 1 calc R . . 
C1 C 0.5557(2) 0.4427(2) 0.27985(9) 0.0246(8) Uani 1 1 d . . . 
C16 C 0.4961(2) 0.2912(2) 0.09781(9) 0.0263(8) Uani 1 1 d . . . 
C10 C 0.4264(2) 0.3694(2) 0.14360(9) 0.0245(8) Uani 1 1 d . . . 
C4 C 0.5044(2) 0.2122(2) 0.26192(9) 0.0246(8) Uani 1 1 d . . . 
C5 C 0.4923(2) 0.2058(2) 0.22556(9) 0.0238(8) Uani 1 1 d . . . 
H5 H 0.4775 0.1524 0.2138 0.029 Uiso 1 1 calc R . . 
C6 C 0.5015(2) 0.2768(2) 0.20591(9) 0.0238(8) Uani 1 1 d . . . 
C7 C 0.5186(2) 0.3533(2) 0.22372(9) 0.0241(8) Uani 1 1 d . . . 
H7 H 0.5216 0.4012 0.2109 0.029 Uiso 1 1 calc R . . 
C3 C 0.5241(2) 0.2891(2) 0.27960(9) 0.0249(8) Uani 1 1 d . . . 
H3 H 0.5325 0.2935 0.3046 0.030 Uiso 1 1 calc R . . 
C2 C 0.5312(2) 0.3593(2) 0.26029(9) 0.0229(8) Uani 1 1 d . . . 
N2 N 0.4944(2) 0.2680(2) 0.16843(8) 0.0265(8) Uani 1 1 d . . . 
N1 N 0.49694(19) 0.13858(19) 0.28153(7) 0.0244(7) Uani 1 1 d . . . 
O1 O 0.50017(17) 0.45316(17) 0.29514(7) 0.0319(6) Uani 1 1 d . . . 
H2N H 0.510(3) 0.237(3) 0.1627(11) 0.031(13) Uiso 1 1 d . . . 
 
loop_ 
 _atom_site_aniso_label 
 _atom_site_aniso_U_11 
 _atom_site_aniso_U_22 
 _atom_site_aniso_U_33 
 _atom_site_aniso_U_23 
 _atom_site_aniso_U_13 
 _atom_site_aniso_U_12 
Cl1 0.0463(8) 0.1029(12) 0.0503(8) -0.0036(7) 0.0076(6) 0.0219(8) 
Cl3 0.0873(10) 0.0719(9) 0.0467(7) 0.0036(6) 0.0043(7) 0.0482(8) 
Cl2 0.0514(7) 0.0842(10) 0.0433(7) -0.0236(6) -0.0075(5) 0.0315(7) 
O2 0.0287(14) 0.0310(15) 0.0223(13) 0.0002(11) -0.0006(11) 0.0139(12) 
P1 0.0273(5) 0.0280(5) 0.0171(5) 0.0001(4) -0.0004(4) 0.0143(4) 
C22 0.039(3) 0.065(3) 0.033(2) -0.008(2) -0.0039(19) 0.027(2) 
C9 0.031(2) 0.044(3) 0.040(2) 0.004(2) 0.0024(19) 0.012(2) 
C20 0.048(3) 0.059(3) 0.018(2) 0.0032(19) -0.0005(18) 0.031(3) 
C19 0.055(3) 0.055(3) 0.021(2) -0.0074(19) -0.0059(19) 0.032(3) 
C18 0.052(3) 0.043(3) 0.029(2) -0.0068(19) -0.010(2) 0.024(2) 
C12 0.041(3) 0.040(2) 0.033(2) -0.0001(18) -0.0060(18) 0.025(2) 
C13 0.033(2) 0.050(3) 0.036(2) -0.009(2) -0.0042(18) 0.027(2) 
C17 0.039(2) 0.036(2) 0.024(2) -0.0014(17) -0.0021(17) 0.016(2) 
C14 0.030(2) 0.036(2) 0.031(2) -0.0083(18) 0.0018(17) 0.0127(19) 
C8 0.033(2) 0.031(2) 0.0228(19) 0.0051(16) 0.0067(16) 0.0138(18) 
C21 0.034(2) 0.042(2) 0.022(2) 0.0033(17) 0.0007(16) 0.018(2) 
C11 0.028(2) 0.033(2) 0.025(2) -0.0001(16) -0.0028(16) 0.0138(18) 
C15 0.031(2) 0.028(2) 0.0212(18) -0.0002(15) 0.0023(16) 0.0128(18) 
C1 0.030(2) 0.032(2) 0.0148(17) 0.0035(15) 0.0015(15) 0.0181(19) 
C16 0.030(2) 0.036(2) 0.0179(18) -0.0004(16) -0.0021(15) 0.0206(19) 
C10 0.030(2) 0.027(2) 0.0166(17) -0.0025(15) -0.0023(15) 0.0145(17) 
C4 0.023(2) 0.024(2) 0.0243(19) 0.0044(15) 0.0037(15) 0.0107(17) 
C5 0.026(2) 0.024(2) 0.0192(18) -0.0003(15) -0.0001(15) 0.0114(17) 
C6 0.024(2) 0.031(2) 0.0167(17) 0.0008(15) -0.0002(14) 0.0144(17) 
C7 0.028(2) 0.027(2) 0.0215(18) 0.0022(15) 0.0008(15) 0.0165(17) 
C3 0.026(2) 0.029(2) 0.0184(17) 0.0002(15) -0.0007(15) 0.0128(17) 
C2 0.0233(19) 0.026(2) 0.0200(18) -0.0012(15) 0.0007(14) 0.0126(17) 
N2 0.039(2) 0.0271(18) 0.0189(16) -0.0011(13) -0.0008(14) 0.0211(17) 
N1 0.0291(17) 0.0254(17) 0.0179(15) 0.0039(12) 0.0032(13) 0.0131(14) 
O1 0.0314(15) 0.0373(16) 0.0294(14) -0.0028(12) 0.0054(12) 0.0190(13) 
 
_geom_special_details 
; 
 All esds (except the esd in the dihedral angle between two l.s. planes) 
 are estimated using the full covariance matrix.  The cell esds are taken 
 into account individually in the estimation of esds in distances, angles 
 and torsion angles; correlations between esds in cell parameters are only 
 used when they are defined by crystal symmetry.  An approximate (isotropic) 
 treatment of cell esds is used for estimating esds involving l.s. planes. 
; 
 
loop_ 
 _geom_bond_atom_site_label_1 
 _geom_bond_atom_site_label_2 
 _geom_bond_distance 
 _geom_bond_site_symmetry_2 
 _geom_bond_publ_flag 
Cl1 C22 1.752(5) . ? 
Cl3 C22 1.760(5) . ? 
Cl2 C22 1.751(4) . ? 
O2 P1 1.482(3) . ? 
P1 N2 1.655(3) . ? 
P1 C16 1.791(4) . ? 
P1 C10 1.794(4) . ? 
C22 H22 1.0000 . ? 
C9 C8 1.513(5) . ? 
C9 H9A 0.9800 . ? 
C9 H9B 0.9800 . ? 
C9 H9C 0.9800 . ? 
C20 C19 1.371(6) . ? 
C20 C21 1.384(6) . ? 
C20 H20 0.9500 . ? 
C19 C18 1.383(6) . ? 
C19 H19 0.9500 . ? 
C18 C17 1.388(5) . ? 
C18 H18 0.9500 . ? 
C12 C11 1.378(5) . ? 
C12 C13 1.381(6) . ? 
C12 H12 0.9500 . ? 
C13 C14 1.382(6) . ? 
C13 H13 0.9500 . ? 
C17 C16 1.395(5) . ? 
C17 H17 0.9500 . ? 
C14 C15 1.378(5) . ? 
C14 H14 0.9500 . ? 
C8 N1 1.476(5) . ? 
C8 H8A 0.9900 . ? 
C8 H8B 0.9900 . ? 
C21 C16 1.393(5) . ? 
C21 H21 0.9500 . ? 
C11 C10 1.393(5) . ? 
C11 H11 0.9500 . ? 
C15 C10 1.387(5) . ? 
C15 H15 0.9500 . ? 
C1 O1 1.226(4) . ? 
C1 N1 1.349(5) 3_665 ? 
C1 C2 1.501(5) . ? 
C4 C5 1.381(5) . ? 
C4 C3 1.389(5) . ? 
C4 N1 1.441(4) . ? 
C5 C6 1.392(5) . ? 
C5 H5 0.9500 . ? 
C6 C7 1.397(5) . ? 
C6 N2 1.418(5) . ? 
C7 C2 1.390(5) . ? 
C7 H7 0.9500 . ? 
C3 C2 1.386(5) . ? 
C3 H3 0.9500 . ? 
N2 H2N 0.75(4) . ? 
N1 C1 1.349(5) 2_655 ? 
 
loop_ 
 _geom_angle_atom_site_label_1 
 _geom_angle_atom_site_label_2 
 _geom_angle_atom_site_label_3 
 _geom_angle 
 _geom_angle_site_symmetry_1 
 _geom_angle_site_symmetry_3 
 _geom_angle_publ_flag 
O2 P1 N2 118.23(16) . . ? 
O2 P1 C16 113.38(16) . . ? 
N2 P1 C16 102.43(17) . . ? 
O2 P1 C10 110.21(16) . . ? 
N2 P1 C10 106.59(17) . . ? 
C16 P1 C10 104.90(16) . . ? 
Cl2 C22 Cl1 110.8(2) . . ? 
Cl2 C22 Cl3 110.3(2) . . ? 
Cl1 C22 Cl3 110.3(3) . . ? 
Cl2 C22 H22 108.5 . . ? 
Cl1 C22 H22 108.5 . . ? 
Cl3 C22 H22 108.5 . . ? 
C8 C9 H9A 109.5 . . ? 
C8 C9 H9B 109.5 . . ? 
H9A C9 H9B 109.5 . . ? 
C8 C9 H9C 109.5 . . ? 
H9A C9 H9C 109.5 . . ? 
H9B C9 H9C 109.5 . . ? 
C19 C20 C21 120.9(4) . . ? 
C19 C20 H20 119.5 . . ? 
C21 C20 H20 119.5 . . ? 
C20 C19 C18 120.2(4) . . ? 
C20 C19 H19 119.9 . . ? 
C18 C19 H19 119.9 . . ? 
C19 C18 C17 119.6(4) . . ? 
C19 C18 H18 120.2 . . ? 
C17 C18 H18 120.2 . . ? 
C11 C12 C13 119.8(4) . . ? 
C11 C12 H12 120.1 . . ? 
C13 C12 H12 120.1 . . ? 
C12 C13 C14 119.7(4) . . ? 
C12 C13 H13 120.1 . . ? 
C14 C13 H13 120.1 . . ? 
C18 C17 C16 120.4(4) . . ? 
C18 C17 H17 119.8 . . ? 
C16 C17 H17 119.8 . . ? 
C15 C14 C13 120.6(4) . . ? 
C15 C14 H14 119.7 . . ? 
C13 C14 H14 119.7 . . ? 
N1 C8 C9 112.4(3) . . ? 
N1 C8 H8A 109.1 . . ? 
C9 C8 H8A 109.1 . . ? 
N1 C8 H8B 109.1 . . ? 
C9 C8 H8B 109.1 . . ? 
H8A C8 H8B 107.8 . . ? 
C20 C21 C16 119.6(4) . . ? 
C20 C21 H21 120.2 . . ? 
C16 C21 H21 120.2 . . ? 
C12 C11 C10 121.0(4) . . ? 
C12 C11 H11 119.5 . . ? 
C10 C11 H11 119.5 . . ? 
C14 C15 C10 120.3(4) . . ? 
C14 C15 H15 119.9 . . ? 
C10 C15 H15 119.9 . . ? 
O1 C1 N1 121.7(3) . 3_665 ? 
O1 C1 C2 121.1(3) . . ? 
N1 C1 C2 117.1(3) 3_665 . ? 
C21 C16 C17 119.3(3) . . ? 
C21 C16 P1 118.1(3) . . ? 
C17 C16 P1 122.4(3) . . ? 
C15 C10 C11 118.7(3) . . ? 
C15 C10 P1 123.3(3) . . ? 
C11 C10 P1 117.8(3) . . ? 
C5 C4 C3 120.5(3) . . ? 
C5 C4 N1 119.5(3) . . ? 
C3 C4 N1 119.9(3) . . ? 
C4 C5 C6 120.6(3) . . ? 
C4 C5 H5 119.7 . . ? 
C6 C5 H5 119.7 . . ? 
C5 C6 C7 119.0(3) . . ? 
C5 C6 N2 117.7(3) . . ? 
C7 C6 N2 123.3(3) . . ? 
C2 C7 C6 119.9(3) . . ? 
C2 C7 H7 120.1 . . ? 
C6 C7 H7 120.1 . . ? 
C2 C3 C4 119.2(3) . . ? 
C2 C3 H3 120.4 . . ? 
C4 C3 H3 120.4 . . ? 
C3 C2 C7 120.8(3) . . ? 
C3 C2 C1 118.1(3) . . ? 
C7 C2 C1 121.1(3) . . ? 
C6 N2 P1 126.3(3) . . ? 
C6 N2 H2N 109(3) . . ? 
P1 N2 H2N 115(3) . . ? 
C1 N1 C4 123.1(3) 2_655 . ? 
C1 N1 C8 119.1(3) 2_655 . ? 
C4 N1 C8 117.7(3) . . ? 
 
_diffrn_measured_fraction_theta_max    0.998 
_diffrn_reflns_theta_full              24.62 
_diffrn_measured_fraction_theta_full   0.998 
_refine_diff_density_max    1.198 
_refine_diff_density_min   -0.390 
_refine_diff_density_rms    0.074 


#==END


data_compound1b 
 
_audit_creation_method            SHELXL-97 
_chemical_name_systematic 
; 
 ? 
; 
_chemical_name_common             ? 
_chemical_melting_point           ? 
_chemical_formula_moiety          ? 
_chemical_formula_sum 
 'C67 H65 N6 O8 P3' 
_chemical_formula_weight          1175.16 
 
loop_ 
 _atom_type_symbol 
 _atom_type_description 
 _atom_type_scat_dispersion_real 
 _atom_type_scat_dispersion_imag 
 _atom_type_scat_source 
 'C'  'C'   0.0033   0.0016 
 'International Tables Vol C Tables 4.2.6.8 and 6.1.1.4' 
 'H'  'H'   0.0000   0.0000 
 'International Tables Vol C Tables 4.2.6.8 and 6.1.1.4' 
 'N'  'N'   0.0061   0.0033 
 'International Tables Vol C Tables 4.2.6.8 and 6.1.1.4' 
 'O'  'O'   0.0106   0.0060 
 'International Tables Vol C Tables 4.2.6.8 and 6.1.1.4' 
 'P'  'P'   0.1023   0.0942 
 'International Tables Vol C Tables 4.2.6.8 and 6.1.1.4' 
 
_symmetry_cell_setting           'Triclinic'
_symmetry_space_group_name_H-M   'P-1   '
loop_ 
 _symmetry_equiv_pos_as_xyz 
 'x, y, z' 
 '-x, -y, -z' 
 
_cell_length_a                    13.721(5) 
_cell_length_b                    14.840(6) 
_cell_length_c                    15.073(6) 
_cell_angle_alpha                 94.518(5) 
_cell_angle_beta                  91.104(5) 
_cell_angle_gamma                 100.582(5) 
_cell_volume                      3006.0(19) 
_cell_formula_units_Z             2 
_cell_measurement_temperature     100 
_cell_measurement_reflns_used    4472
_cell_measurement_theta_min        2.24
_cell_measurement_theta_max       23.88
_exptl_crystal_description        'prismatic'
_exptl_crystal_colour             'colorless'
_exptl_crystal_size_max           0.10 
_exptl_crystal_size_mid           0.10 
_exptl_crystal_size_min           0.10 
_exptl_crystal_density_meas       ? 
_exptl_crystal_density_diffrn     1.298 
_exptl_crystal_density_method     'not measured' 
_exptl_crystal_F_000              1236 
_exptl_absorpt_coefficient_mu     0.161 
_exptl_absorpt_correction_type    empirical
_exptl_absorpt_correction_T_min   0.9841 
_exptl_absorpt_correction_T_max   0.9841 
_exptl_absorpt_process_details    
;
SADABS Sheldrick 1996
;
_exptl_special_details 
; 
 ? 
; 
 
_diffrn_ambient_temperature       100 
_diffrn_radiation_wavelength      0.71073 
_diffrn_radiation_type            MoK\a 
_diffrn_radiation_source          'sealed tube'
_diffrn_radiation_monochromator   'graphite'
_diffrn_measurement_device_type   'Bruker APEXII CCD area detector' 
_diffrn_measurement_method        'phi and omega scans' 
_diffrn_detector_area_resol_mean  8.333
_diffrn_standards_number          ? 
_diffrn_standards_interval_count  ? 
_diffrn_standards_interval_time   ? 
_diffrn_standards_decay_%         ? 
_diffrn_reflns_number             29925 
_diffrn_reflns_av_R_equivalents   0.0514 
_diffrn_reflns_av_sigmaI/netI     0.0773 
_diffrn_reflns_limit_h_min        -16 
_diffrn_reflns_limit_h_max        17 
_diffrn_reflns_limit_k_min        -17 
_diffrn_reflns_limit_k_max        17 
_diffrn_reflns_limit_l_min        -18 
_diffrn_reflns_limit_l_max        18 
_diffrn_reflns_theta_min          1.36 
_diffrn_reflns_theta_max          26.83 
_reflns_number_total              11481 
_reflns_number_gt                 7538 
_reflns_threshold_expression      >2sigma(I) 
 
_computing_data_collection        'APEX2 (Bruker AXS, 2006)'
_computing_cell_refinement        'APEX2 (Bruker AXS, 2006)'
_computing_data_reduction         'SAINT (Bruker AXS, 2004)'
_computing_structure_solution     'SHELXS-97 (Sheldrick, 1997)'
_computing_structure_refinement   'SHELXL-97 (Sheldrick, 1997)'
_computing_molecular_graphics     'XSHEL (Bruker AXS,2002)'
_computing_publication_material   'XCIF (Bruker AXS, 2001)' 
_refine_special_details 
; 
 Refinement of F^2^ against ALL reflections.  The weighted R-factor wR and 
 goodness of fit S are based on F^2^, conventional R-factors R are based 
 on F, with F set to zero for negative F^2^. The threshold expression of 
 F^2^ > 2sigma(F^2^) is used only for calculating R-factors(gt) etc. and is 
 not relevant to the choice of reflections for refinement.  R-factors based 
 on F^2^ are statistically about twice as large as those based on F, and R- 
 factors based on ALL data will be even larger. 
; 
 
_refine_ls_structure_factor_coef  Fsqd  
_refine_ls_matrix_type            full 
_refine_ls_weighting_scheme       calc  
_refine_ls_weighting_details 
 'calc w=1/[\s^2^(Fo^2^)+(0.0579P)^2^+0.4297P] where P=(Fo^2^+2Fc^2^)/3' 
_atom_sites_solution_primary      direct 
_atom_sites_solution_secondary    difmap 
_atom_sites_solution_hydrogens    geom 
_refine_ls_hydrogen_treatment     mixed
_refine_ls_extinction_method      none 
_refine_ls_extinction_coef        ? 
_refine_ls_number_reflns          11481 
_refine_ls_number_parameters      774 
_refine_ls_number_restraints      0 
_refine_ls_R_factor_all           0.0850 
_refine_ls_R_factor_gt            0.0455 
_refine_ls_wR_factor_ref          0.1235 
_refine_ls_wR_factor_gt           0.1078 
_refine_ls_goodness_of_fit_ref    0.985 
_refine_ls_restrained_S_all       0.985 
_refine_ls_shift/su_max           0.001 
_refine_ls_shift/su_mean          0.000 
 
loop_ 
 _atom_site_label 
 _atom_site_type_symbol 
 _atom_site_fract_x 
 _atom_site_fract_y 
 _atom_site_fract_z 
 _atom_site_U_iso_or_equiv 
 _atom_site_adp_type 
 _atom_site_occupancy 
 _atom_site_symmetry_multiplicity 
 _atom_site_calc_flag 
 _atom_site_refinement_flags 
 _atom_site_disorder_assembly 
 _atom_site_disorder_group 
C1 C 0.2932(2) 0.44610(17) 0.27676(16) 0.0212(6) Uani 1 1 d . . . 
C2 C 0.27527(18) 0.51197(16) 0.20967(16) 0.0188(6) Uani 1 1 d . . . 
C3 C 0.21668(19) 0.57637(17) 0.23308(16) 0.0204(6) Uani 1 1 d . . . 
H3 H 0.1876 0.5769 0.2898 0.024 Uiso 1 1 calc R . . 
C4 C 0.19997(18) 0.64030(16) 0.17443(16) 0.0180(5) Uani 1 1 d . . . 
C5 C 0.23495(18) 0.63244(16) 0.08796(15) 0.0179(5) Uani 1 1 d . . . 
H5 H 0.2196 0.6721 0.0454 0.022 Uiso 1 1 calc R . . 
C6 C 0.29164(18) 0.56718(17) 0.06469(15) 0.0184(6) Uani 1 1 d . . . 
C7 C 0.31416(18) 0.50691(17) 0.12491(16) 0.0204(6) Uani 1 1 d . . . 
H7 H 0.3550 0.4634 0.1087 0.024 Uiso 1 1 calc R . . 
C8 C 0.68424(19) 0.68308(18) 0.25415(17) 0.0233(6) Uani 1 1 d . . . 
C9 C 0.58270(18) 0.66374(17) 0.29292(15) 0.0196(6) Uani 1 1 d . . . 
C10 C 0.54022(18) 0.73675(17) 0.32785(15) 0.0193(6) Uani 1 1 d . . . 
H10 H 0.5759 0.7979 0.3273 0.023 Uiso 1 1 calc R . . 
C11 C 0.44633(18) 0.72152(17) 0.36360(15) 0.0190(6) Uani 1 1 d . . . 
C12 C 0.39685(19) 0.63073(16) 0.36696(15) 0.0196(6) Uani 1 1 d . . . 
H12 H 0.3347 0.6183 0.3945 0.024 Uiso 1 1 calc R . . 
C13 C 0.43858(19) 0.55907(16) 0.33004(16) 0.0195(6) Uani 1 1 d . . . 
C14 C 0.53170(19) 0.57378(18) 0.29355(16) 0.0222(6) Uani 1 1 d . . . 
H14 H 0.5599 0.5236 0.2696 0.027 Uiso 1 1 calc R . . 
C15 C 0.41831(19) 0.60735(16) -0.04572(16) 0.0191(6) Uani 1 1 d . . . 
C16 C 0.46946(18) 0.68078(17) 0.02254(15) 0.0186(6) Uani 1 1 d . . . 
C17 C 0.55537(18) 0.66842(17) 0.06705(16) 0.0199(6) Uani 1 1 d . . . 
H17 H 0.5808 0.6134 0.0555 0.024 Uiso 1 1 calc R . . 
C18 C 0.60292(18) 0.73727(17) 0.12823(15) 0.0180(5) Uani 1 1 d . . . 
C19 C 0.56757(18) 0.81805(16) 0.14499(15) 0.0179(5) Uani 1 1 d . . . 
H19 H 0.6029 0.8655 0.1857 0.021 Uiso 1 1 calc R . . 
C20 C 0.48048(18) 0.83060(16) 0.10268(15) 0.0173(5) Uani 1 1 d . . . 
C21 C 0.43263(18) 0.76114(16) 0.03974(15) 0.0177(5) Uani 1 1 d . . . 
H21 H 0.3744 0.7692 0.0086 0.021 Uiso 1 1 calc R . . 
C22 C 0.26671(19) 0.49770(18) -0.09207(16) 0.0246(6) Uani 1 1 d . . . 
H22A H 0.2405 0.4396 -0.0655 0.030 Uiso 1 1 calc R . . 
H22B H 0.3085 0.4832 -0.1421 0.030 Uiso 1 1 calc R . . 
C23 C 0.1801(2) 0.5370(2) -0.12808(18) 0.0325(7) Uani 1 1 d . . . 
H23A H 0.1362 0.5481 -0.0795 0.049 Uiso 1 1 calc R . . 
H23B H 0.1430 0.4931 -0.1742 0.049 Uiso 1 1 calc R . . 
H23C H 0.2055 0.5950 -0.1537 0.049 Uiso 1 1 calc R . . 
C24 C 0.3987(2) 0.40631(19) 0.39447(19) 0.0361(7) Uani 1 1 d . . . 
H24A H 0.4710 0.4153 0.4072 0.043 Uiso 1 1 calc R . . 
H24B H 0.3757 0.3416 0.3708 0.043 Uiso 1 1 calc R . . 
C25 C 0.3470(3) 0.4240(2) 0.4801(2) 0.0562(10) Uani 1 1 d . . . 
H25A H 0.3701 0.4878 0.5042 0.084 Uiso 1 1 calc R . . 
H25B H 0.3623 0.3823 0.5234 0.084 Uiso 1 1 calc R . . 
H25C H 0.2752 0.4134 0.4682 0.084 Uiso 1 1 calc R . . 
C26 C 0.78610(19) 0.75608(18) 0.13634(17) 0.0258(6) Uani 1 1 d . . . 
H26A H 0.7849 0.7253 0.0755 0.031 Uiso 1 1 calc R . . 
H26B H 0.8394 0.7373 0.1717 0.031 Uiso 1 1 calc R . . 
C27 C 0.8095(2) 0.85974(18) 0.13131(19) 0.0323(7) Uani 1 1 d . . . 
H27A H 0.7615 0.8778 0.0905 0.049 Uiso 1 1 calc R . . 
H27B H 0.8766 0.8776 0.1095 0.049 Uiso 1 1 calc R . . 
H27C H 0.8056 0.8906 0.1907 0.049 Uiso 1 1 calc R . . 
C28 C 0.04700(18) 0.74941(17) 0.05742(16) 0.0190(6) Uani 1 1 d . . . 
C29 C 0.02485(19) 0.80854(18) -0.00506(16) 0.0239(6) Uani 1 1 d . . . 
H29 H 0.0548 0.8718 0.0017 0.029 Uiso 1 1 calc R . . 
C30 C -0.0401(2) 0.7756(2) -0.07642(17) 0.0289(7) Uani 1 1 d . . . 
H30 H -0.0561 0.8165 -0.1175 0.035 Uiso 1 1 calc R . . 
C31 C -0.08193(19) 0.6829(2) -0.08803(17) 0.0280(6) Uani 1 1 d . . . 
H31 H -0.1251 0.6599 -0.1380 0.034 Uiso 1 1 calc R . . 
C32 C -0.06082(19) 0.62413(19) -0.02696(17) 0.0249(6) Uani 1 1 d . . . 
H32 H -0.0893 0.5606 -0.0351 0.030 Uiso 1 1 calc R . . 
C33 C 0.00189(19) 0.65736(18) 0.04644(17) 0.0234(6) Uani 1 1 d . . . 
H33 H 0.0140 0.6168 0.0894 0.028 Uiso 1 1 calc R . . 
C34 C 0.07181(18) 0.86613(17) 0.22251(16) 0.0190(6) Uani 1 1 d . . . 
C35 C 0.0951(2) 0.96144(18) 0.22255(17) 0.0258(6) Uani 1 1 d . . . 
H35 H 0.1452 0.9890 0.1853 0.031 Uiso 1 1 calc R . . 
C36 C 0.0451(2) 1.01619(19) 0.27724(18) 0.0319(7) Uani 1 1 d . . . 
H36 H 0.0612 1.0813 0.2775 0.038 Uiso 1 1 calc R . . 
C37 C -0.0278(2) 0.9764(2) 0.33109(18) 0.0321(7) Uani 1 1 d . . . 
H37 H -0.0620 1.0141 0.3681 0.039 Uiso 1 1 calc R . . 
C38 C -0.0515(2) 0.88141(19) 0.33163(17) 0.0291(7) Uani 1 1 d . . . 
H38 H -0.1016 0.8542 0.3691 0.035 Uiso 1 1 calc R . . 
C39 C -0.00180(19) 0.82629(18) 0.27716(16) 0.0234(6) Uani 1 1 d . . . 
H39 H -0.0181 0.7612 0.2772 0.028 Uiso 1 1 calc R . . 
C40 C 0.31490(19) 0.73842(17) 0.54343(16) 0.0210(6) Uani 1 1 d . . . 
C41 C 0.4029(2) 0.76569(18) 0.59396(17) 0.0255(6) Uani 1 1 d . . . 
H41 H 0.4534 0.8117 0.5741 0.031 Uiso 1 1 calc R . . 
C42 C 0.4180(2) 0.72715(19) 0.67249(18) 0.0297(7) Uani 1 1 d . . . 
H42 H 0.4779 0.7476 0.7069 0.036 Uiso 1 1 calc R . . 
C43 C 0.3458(2) 0.6589(2) 0.70052(19) 0.0369(7) Uani 1 1 d . . . 
H43 H 0.3562 0.6313 0.7538 0.044 Uiso 1 1 calc R . . 
C44 C 0.2586(2) 0.6310(2) 0.65108(19) 0.0445(9) Uani 1 1 d . . . 
H44 H 0.2088 0.5842 0.6707 0.053 Uiso 1 1 calc R . . 
C45 C 0.2427(2) 0.6703(2) 0.57330(18) 0.0349(7) Uani 1 1 d . . . 
H45 H 0.1820 0.6506 0.5400 0.042 Uiso 1 1 calc R . . 
C46 C 0.28498(18) 0.90739(17) 0.46714(15) 0.0180(5) Uani 1 1 d . . . 
C47 C 0.3665(2) 0.97313(17) 0.49921(16) 0.0222(6) Uani 1 1 d . . . 
H47 H 0.4289 0.9554 0.5077 0.027 Uiso 1 1 calc R . . 
C48 C 0.3578(2) 1.06417(18) 0.51885(16) 0.0246(6) Uani 1 1 d . . . 
H48 H 0.4141 1.1086 0.5398 0.029 Uiso 1 1 calc R . . 
C49 C 0.2668(2) 1.08992(19) 0.50789(17) 0.0277(6) Uani 1 1 d . . . 
H49 H 0.2605 1.1521 0.5219 0.033 Uiso 1 1 calc R . . 
C50 C 0.1853(2) 1.02592(19) 0.47668(17) 0.0300(7) Uani 1 1 d . . . 
H50 H 0.1230 1.0441 0.4689 0.036 Uiso 1 1 calc R . . 
C51 C 0.1937(2) 0.93488(19) 0.45656(16) 0.0267(6) Uani 1 1 d . . . 
H51 H 0.1371 0.8910 0.4355 0.032 Uiso 1 1 calc R . . 
C52 C 0.59948(18) 1.03883(16) 0.19155(16) 0.0187(6) Uani 1 1 d . . . 
C53 C 0.66475(19) 1.06171(18) 0.26536(16) 0.0237(6) Uani 1 1 d . . . 
H53 H 0.6427 1.0463 0.3226 0.028 Uiso 1 1 calc R . . 
C54 C 0.7610(2) 1.1065(2) 0.25610(18) 0.0319(7) Uani 1 1 d . . . 
H54 H 0.8048 1.1222 0.3068 0.038 Uiso 1 1 calc R . . 
C55 C 0.7935(2) 1.1283(2) 0.17349(18) 0.0355(7) Uani 1 1 d . . . 
H55 H 0.8596 1.1596 0.1674 0.043 Uiso 1 1 calc R . . 
C56 C 0.7303(2) 1.1050(2) 0.09875(18) 0.0323(7) Uani 1 1 d . . . 
H56 H 0.7534 1.1193 0.0416 0.039 Uiso 1 1 calc R . . 
C57 C 0.63359(19) 1.06079(18) 0.10796(16) 0.0246(6) Uani 1 1 d . . . 
H57 H 0.5901 1.0453 0.0570 0.029 Uiso 1 1 calc R . . 
C58 C 0.39563(18) 1.06675(16) 0.19925(16) 0.0195(6) Uani 1 1 d . . . 
C59 C 0.3870(2) 1.10768(18) 0.12028(18) 0.0312(7) Uani 1 1 d . . . 
H59 H 0.4210 1.0896 0.0695 0.037 Uiso 1 1 calc R . . 
C60 C 0.3295(2) 1.1745(2) 0.1152(2) 0.0395(8) Uani 1 1 d . . . 
H60 H 0.3236 1.2021 0.0611 0.047 Uiso 1 1 calc R . . 
C61 C 0.2805(2) 1.20086(19) 0.1894(2) 0.0364(8) Uani 1 1 d . . . 
H61 H 0.2410 1.2469 0.1861 0.044 Uiso 1 1 calc R . . 
C62 C 0.2884(2) 1.16079(19) 0.26836(19) 0.0312(7) Uani 1 1 d . . . 
H62 H 0.2546 1.1794 0.3190 0.037 Uiso 1 1 calc R . . 
C63 C 0.34567(19) 1.09348(17) 0.27358(17) 0.0238(6) Uani 1 1 d . . . 
H63 H 0.3509 1.0656 0.3277 0.029 Uiso 1 1 calc R . . 
C64 C 0.0276(3) 0.2756(3) 0.4102(2) 0.0549(10) Uani 1 1 d . . . 
C65 C 0.0036(3) 0.2888(3) 0.3183(2) 0.0608(11) Uani 1 1 d . . . 
H65A H 0.0094 0.2335 0.2802 0.091 Uiso 1 1 calc R . . 
H65B H 0.0497 0.3417 0.2992 0.091 Uiso 1 1 calc R . . 
H65C H -0.0644 0.3000 0.3136 0.091 Uiso 1 1 calc R . . 
C66 C 0.0465(3) 0.3413(3) 0.5588(2) 0.0566(10) Uani 1 1 d . . . 
H66A H 0.1158 0.3335 0.5692 0.068 Uiso 1 1 calc R . . 
H66B H 0.0014 0.2873 0.5788 0.068 Uiso 1 1 calc R . . 
C67 C 0.0287(3) 0.4284(2) 0.6087(2) 0.0628(11) Uani 1 1 d . . . 
H67A H 0.0747 0.4811 0.5890 0.094 Uiso 1 1 calc R . . 
H67B H 0.0394 0.4248 0.6727 0.094 Uiso 1 1 calc R . . 
H67C H -0.0397 0.4359 0.5968 0.094 Uiso 1 1 calc R . . 
H4N H 0.158(2) 0.7217(19) 0.2627(19) 0.038(9) Uiso 1 1 d . . . 
H5N H 0.415(2) 0.840(2) 0.3685(19) 0.032(9) Uiso 1 1 d . . . 
H6N H 0.375(2) 0.8991(19) 0.1152(18) 0.037(9) Uiso 1 1 d . . . 
N1 N 0.32835(15) 0.56102(14) -0.02483(13) 0.0203(5) Uani 1 1 d . . . 
N2 N 0.37948(16) 0.46770(14) 0.32612(13) 0.0224(5) Uani 1 1 d . . . 
N3 N 0.69041(15) 0.72552(14) 0.17683(13) 0.0196(5) Uani 1 1 d . . . 
N4 N 0.14978(15) 0.71116(14) 0.20488(14) 0.0189(5) Uani 1 1 d . . . 
N5 N 0.40136(16) 0.79643(16) 0.39231(14) 0.0194(5) Uani 1 1 d . . . 
N6 N 0.43841(17) 0.90960(14) 0.12243(13) 0.0182(5) Uani 1 1 d . . . 
O1 O 0.23170(13) 0.37625(12) 0.28504(12) 0.0273(4) Uani 1 1 d . . . 
O2 O 0.75671(14) 0.66291(15) 0.29145(12) 0.0373(5) Uani 1 1 d . . . 
O3 O 0.45653(13) 0.59214(12) -0.11701(11) 0.0282(4) Uani 1 1 d . . . 
O4 O 0.22397(12) 0.85385(11) 0.11091(11) 0.0220(4) Uani 1 1 d . . . 
O5 O 0.20324(12) 0.73610(11) 0.39222(10) 0.0213(4) Uani 1 1 d . . . 
O6 O 0.47009(12) 0.94798(11) 0.29984(10) 0.0217(4) Uani 1 1 d . . . 
O7 O 0.02759(15) 0.34991(14) 0.46488(13) 0.0411(5) Uani 1 1 d . . . 
O8 O 0.0462(3) 0.2050(2) 0.4361(2) 0.1124(13) Uani 1 1 d . . . 
P1 P 0.13448(5) 0.79858(4) 0.14704(4) 0.01794(16) Uani 1 1 d . . . 
P2 P 0.29365(5) 0.78866(4) 0.44143(4) 0.01833(16) Uani 1 1 d . . . 
P3 P 0.47432(5) 0.98430(4) 0.21037(4) 0.01746(16) Uani 1 1 d . . . 
 
loop_ 
 _atom_site_aniso_label 
 _atom_site_aniso_U_11 
 _atom_site_aniso_U_22 
 _atom_site_aniso_U_33 
 _atom_site_aniso_U_23 
 _atom_site_aniso_U_13 
 _atom_site_aniso_U_12 
C1 0.0264(16) 0.0183(14) 0.0188(13) -0.0028(11) -0.0004(11) 0.0058(12) 
C2 0.0179(14) 0.0170(13) 0.0195(13) -0.0020(11) -0.0048(11) -0.0002(11) 
C3 0.0219(14) 0.0233(14) 0.0147(13) -0.0007(11) -0.0004(11) 0.0024(11) 
C4 0.0147(13) 0.0201(13) 0.0185(13) -0.0008(11) -0.0017(10) 0.0023(11) 
C5 0.0177(14) 0.0200(13) 0.0156(13) 0.0023(10) -0.0016(11) 0.0020(11) 
C6 0.0162(13) 0.0222(14) 0.0136(12) -0.0060(11) -0.0009(10) -0.0016(11) 
C7 0.0176(14) 0.0202(14) 0.0220(14) -0.0048(11) -0.0030(11) 0.0035(11) 
C8 0.0219(15) 0.0252(15) 0.0232(14) -0.0032(12) -0.0038(12) 0.0079(12) 
C9 0.0190(14) 0.0269(15) 0.0133(12) 0.0007(11) -0.0030(10) 0.0059(12) 
C10 0.0221(14) 0.0193(13) 0.0150(13) 0.0004(10) -0.0035(11) 0.0009(11) 
C11 0.0226(15) 0.0206(14) 0.0137(12) -0.0003(10) -0.0032(11) 0.0052(11) 
C12 0.0231(15) 0.0214(14) 0.0142(13) 0.0016(10) -0.0023(11) 0.0039(11) 
C13 0.0230(15) 0.0172(13) 0.0169(13) 0.0006(10) -0.0062(11) 0.0014(11) 
C14 0.0252(15) 0.0253(15) 0.0180(13) -0.0008(11) -0.0061(11) 0.0112(12) 
C15 0.0219(15) 0.0182(13) 0.0180(13) 0.0004(11) -0.0010(11) 0.0064(11) 
C16 0.0180(14) 0.0218(14) 0.0155(13) 0.0002(11) 0.0024(10) 0.0027(11) 
C17 0.0207(14) 0.0197(14) 0.0199(13) -0.0014(11) 0.0027(11) 0.0063(11) 
C18 0.0155(13) 0.0229(14) 0.0156(13) 0.0021(11) 0.0022(10) 0.0034(11) 
C19 0.0180(14) 0.0186(13) 0.0155(13) -0.0013(10) 0.0018(10) 0.0005(11) 
C20 0.0165(13) 0.0187(13) 0.0165(13) 0.0023(10) 0.0041(10) 0.0025(11) 
C21 0.0142(13) 0.0233(14) 0.0155(13) 0.0029(11) -0.0009(10) 0.0028(11) 
C22 0.0235(15) 0.0265(15) 0.0199(14) -0.0070(11) -0.0005(11) -0.0015(12) 
C23 0.0300(17) 0.0429(18) 0.0222(15) -0.0003(13) -0.0050(13) 0.0023(14) 
C24 0.0413(19) 0.0234(15) 0.0432(18) 0.0121(13) -0.0193(15) 0.0030(14) 
C25 0.073(3) 0.058(2) 0.0315(19) 0.0183(16) -0.0151(18) -0.008(2) 
C26 0.0168(14) 0.0338(16) 0.0267(15) -0.0015(12) 0.0014(12) 0.0065(12) 
C27 0.0221(16) 0.0351(17) 0.0396(17) 0.0071(14) 0.0023(13) 0.0028(13) 
C28 0.0157(13) 0.0239(14) 0.0168(13) -0.0018(11) 0.0034(10) 0.0032(11) 
C29 0.0219(15) 0.0270(15) 0.0222(14) 0.0045(12) -0.0010(12) 0.0025(12) 
C30 0.0233(15) 0.0412(18) 0.0218(15) 0.0085(13) -0.0055(12) 0.0035(14) 
C31 0.0197(15) 0.0411(18) 0.0205(14) -0.0035(13) -0.0023(12) 0.0016(13) 
C32 0.0193(15) 0.0259(15) 0.0270(15) -0.0023(12) -0.0001(12) -0.0003(12) 
C33 0.0210(15) 0.0281(15) 0.0219(14) 0.0016(12) 0.0012(11) 0.0065(12) 
C34 0.0157(14) 0.0233(14) 0.0182(13) -0.0004(11) -0.0041(11) 0.0055(11) 
C35 0.0266(16) 0.0259(15) 0.0246(15) -0.0006(12) -0.0010(12) 0.0057(12) 
C36 0.0378(18) 0.0251(15) 0.0327(16) -0.0068(13) -0.0046(14) 0.0103(14) 
C37 0.0324(17) 0.0399(18) 0.0267(15) -0.0076(13) 0.0003(13) 0.0177(14) 
C38 0.0247(16) 0.0390(18) 0.0245(15) 0.0004(13) 0.0044(12) 0.0089(13) 
C39 0.0232(15) 0.0281(15) 0.0194(14) -0.0004(11) 0.0001(11) 0.0072(12) 
C40 0.0220(15) 0.0249(14) 0.0152(13) 0.0000(11) 0.0024(11) 0.0026(12) 
C41 0.0258(16) 0.0267(15) 0.0240(14) 0.0044(12) 0.0017(12) 0.0037(12) 
C42 0.0297(17) 0.0334(16) 0.0263(15) 0.0030(13) -0.0066(13) 0.0070(14) 
C43 0.0426(19) 0.0455(19) 0.0229(15) 0.0151(14) -0.0015(14) 0.0042(16) 
C44 0.040(2) 0.056(2) 0.0317(17) 0.0207(16) -0.0015(15) -0.0159(16) 
C45 0.0295(17) 0.0475(19) 0.0247(15) 0.0131(14) -0.0034(13) -0.0047(15) 
C46 0.0217(14) 0.0227(14) 0.0099(12) -0.0001(10) 0.0010(10) 0.0059(12) 
C47 0.0236(15) 0.0263(15) 0.0178(13) 0.0007(11) 0.0008(11) 0.0079(12) 
C48 0.0265(16) 0.0266(15) 0.0189(14) -0.0030(11) 0.0017(12) 0.0023(12) 
C49 0.0365(18) 0.0281(16) 0.0198(14) -0.0042(12) 0.0016(12) 0.0117(14) 
C50 0.0291(17) 0.0376(17) 0.0254(15) -0.0057(13) -0.0024(13) 0.0157(14) 
C51 0.0249(16) 0.0323(16) 0.0213(14) -0.0064(12) -0.0008(12) 0.0048(13) 
C52 0.0219(14) 0.0161(13) 0.0172(13) -0.0010(10) 0.0000(11) 0.0026(11) 
C53 0.0256(15) 0.0295(15) 0.0153(13) 0.0019(11) 0.0021(11) 0.0032(12) 
C54 0.0238(16) 0.0429(18) 0.0250(15) -0.0011(13) -0.0025(12) -0.0027(14) 
C55 0.0241(16) 0.0449(19) 0.0329(17) 0.0038(14) 0.0024(13) -0.0063(14) 
C56 0.0269(16) 0.0465(19) 0.0231(15) 0.0081(13) 0.0049(13) 0.0032(14) 
C57 0.0251(16) 0.0298(15) 0.0176(14) 0.0021(12) -0.0003(11) 0.0021(12) 
C58 0.0198(14) 0.0166(13) 0.0209(14) -0.0013(11) -0.0025(11) 0.0019(11) 
C59 0.0431(19) 0.0295(16) 0.0243(15) 0.0034(12) 0.0023(13) 0.0145(14) 
C60 0.056(2) 0.0334(18) 0.0346(18) 0.0083(14) -0.0054(15) 0.0201(16) 
C61 0.0360(18) 0.0271(16) 0.048(2) -0.0078(14) -0.0117(15) 0.0160(14) 
C62 0.0275(16) 0.0312(16) 0.0348(17) -0.0092(13) 0.0000(13) 0.0104(13) 
C63 0.0241(15) 0.0218(14) 0.0246(14) -0.0025(11) 0.0004(12) 0.0033(12) 
C64 0.065(3) 0.043(2) 0.054(2) -0.0075(18) 0.0146(19) 0.0066(19) 
C65 0.048(2) 0.086(3) 0.036(2) -0.0137(19) 0.0074(17) -0.013(2) 
C66 0.076(3) 0.063(2) 0.0325(19) 0.0110(17) -0.0036(18) 0.015(2) 
C67 0.083(3) 0.063(3) 0.0327(19) -0.0059(18) -0.0042(19) -0.008(2) 
N1 0.0208(12) 0.0252(12) 0.0131(11) -0.0053(9) 0.0009(9) 0.0024(10) 
N2 0.0248(13) 0.0177(11) 0.0242(12) 0.0014(9) -0.0065(10) 0.0038(10) 
N3 0.0159(11) 0.0236(12) 0.0192(11) -0.0010(9) 0.0000(9) 0.0048(9) 
N4 0.0223(12) 0.0232(12) 0.0125(11) -0.0004(9) 0.0002(9) 0.0081(10) 
N5 0.0243(13) 0.0171(12) 0.0165(11) 0.0017(10) 0.0036(9) 0.0025(10) 
N6 0.0169(13) 0.0171(11) 0.0209(12) -0.0011(9) -0.0013(10) 0.0052(10) 
O1 0.0287(11) 0.0208(10) 0.0307(11) 0.0027(8) -0.0041(9) 0.0006(9) 
O2 0.0235(11) 0.0619(14) 0.0308(11) 0.0136(10) -0.0020(9) 0.0151(10) 
O3 0.0278(11) 0.0354(11) 0.0184(10) -0.0071(8) 0.0061(8) 0.0013(9) 
O4 0.0200(10) 0.0257(10) 0.0199(9) 0.0022(8) 0.0014(8) 0.0031(8) 
O5 0.0215(10) 0.0236(10) 0.0167(9) -0.0014(7) -0.0028(7) 0.0002(8) 
O6 0.0252(10) 0.0213(9) 0.0180(9) 0.0039(7) 0.0020(8) 0.0019(8) 
O7 0.0498(14) 0.0400(13) 0.0328(12) -0.0018(10) -0.0005(10) 0.0086(11) 
O8 0.208(4) 0.056(2) 0.083(2) -0.0017(17) 0.012(2) 0.052(2) 
P1 0.0177(4) 0.0213(4) 0.0150(3) 0.0002(3) -0.0001(3) 0.0048(3) 
P2 0.0194(4) 0.0213(4) 0.0138(3) 0.0003(3) 0.0007(3) 0.0029(3) 
P3 0.0193(4) 0.0169(3) 0.0159(3) 0.0004(3) 0.0016(3) 0.0029(3) 
 
_geom_special_details 
; 
 All esds (except the esd in the dihedral angle between two l.s. planes) 
 are estimated using the full covariance matrix.  The cell esds are taken 
 into account individually in the estimation of esds in distances, angles 
 and torsion angles; correlations between esds in cell parameters are only 
 used when they are defined by crystal symmetry.  An approximate (isotropic) 
 treatment of cell esds is used for estimating esds involving l.s. planes. 
; 
 
loop_ 
 _geom_bond_atom_site_label_1 
 _geom_bond_atom_site_label_2 
 _geom_bond_distance 
 _geom_bond_site_symmetry_2 
 _geom_bond_publ_flag 
C1 O1 1.227(3) . ? 
C1 N2 1.359(3) . ? 
C1 C2 1.508(3) . ? 
C2 C3 1.387(3) . ? 
C2 C7 1.396(3) . ? 
C3 C4 1.392(3) . ? 
C3 H3 0.9500 . ? 
C4 C5 1.401(3) . ? 
C4 N4 1.412(3) . ? 
C5 C6 1.378(3) . ? 
C5 H5 0.9500 . ? 
C6 C7 1.392(3) . ? 
C6 N1 1.451(3) . ? 
C7 H7 0.9500 . ? 
C8 O2 1.228(3) . ? 
C8 N3 1.365(3) . ? 
C8 C9 1.509(4) . ? 
C9 C14 1.390(3) . ? 
C9 C10 1.395(3) . ? 
C10 C11 1.393(3) . ? 
C10 H10 0.9500 . ? 
C11 C12 1.398(3) . ? 
C11 N5 1.411(3) . ? 
C12 C13 1.383(3) . ? 
C12 H12 0.9500 . ? 
C13 C14 1.388(4) . ? 
C13 N2 1.443(3) . ? 
C14 H14 0.9500 . ? 
C15 O3 1.228(3) . ? 
C15 N1 1.354(3) . ? 
C15 C16 1.501(3) . ? 
C16 C21 1.386(3) . ? 
C16 C17 1.393(3) . ? 
C17 C18 1.380(3) . ? 
C17 H17 0.9500 . ? 
C18 C19 1.381(3) . ? 
C18 N3 1.439(3) . ? 
C19 C20 1.393(3) . ? 
C19 H19 0.9500 . ? 
C20 C21 1.403(3) . ? 
C20 N6 1.413(3) . ? 
C21 H21 0.9500 . ? 
C22 N1 1.467(3) . ? 
C22 C23 1.525(4) . ? 
C22 H22A 0.9900 . ? 
C22 H22B 0.9900 . ? 
C23 H23A 0.9800 . ? 
C23 H23B 0.9800 . ? 
C23 H23C 0.9800 . ? 
C24 N2 1.479(3) . ? 
C24 C25 1.513(4) . ? 
C24 H24A 0.9900 . ? 
C24 H24B 0.9900 . ? 
C25 H25A 0.9800 . ? 
C25 H25B 0.9800 . ? 
C25 H25C 0.9800 . ? 
C26 N3 1.469(3) . ? 
C26 C27 1.521(4) . ? 
C26 H26A 0.9900 . ? 
C26 H26B 0.9900 . ? 
C27 H27A 0.9800 . ? 
C27 H27B 0.9800 . ? 
C27 H27C 0.9800 . ? 
C28 C33 1.388(3) . ? 
C28 C29 1.402(3) . ? 
C28 P1 1.805(3) . ? 
C29 C30 1.382(3) . ? 
C29 H29 0.9500 . ? 
C30 C31 1.387(4) . ? 
C30 H30 0.9500 . ? 
C31 C32 1.379(4) . ? 
C31 H31 0.9500 . ? 
C32 C33 1.389(4) . ? 
C32 H32 0.9500 . ? 
C33 H33 0.9500 . ? 
C34 C35 1.392(4) . ? 
C34 C39 1.392(3) . ? 
C34 P1 1.793(2) . ? 
C35 C36 1.390(4) . ? 
C35 H35 0.9500 . ? 
C36 C37 1.378(4) . ? 
C36 H36 0.9500 . ? 
C37 C38 1.387(4) . ? 
C37 H37 0.9500 . ? 
C38 C39 1.389(3) . ? 
C38 H38 0.9500 . ? 
C39 H39 0.9500 . ? 
C40 C45 1.388(4) . ? 
C40 C41 1.392(4) . ? 
C40 P2 1.802(3) . ? 
C41 C42 1.383(4) . ? 
C41 H41 0.9500 . ? 
C42 C43 1.378(4) . ? 
C42 H42 0.9500 . ? 
C43 C44 1.376(4) . ? 
C43 H43 0.9500 . ? 
C44 C45 1.381(4) . ? 
C44 H44 0.9500 . ? 
C45 H45 0.9500 . ? 
C46 C47 1.393(4) . ? 
C46 C51 1.396(3) . ? 
C46 P2 1.800(3) . ? 
C47 C48 1.387(3) . ? 
C47 H47 0.9500 . ? 
C48 C49 1.382(4) . ? 
C48 H48 0.9500 . ? 
C49 C50 1.376(4) . ? 
C49 H49 0.9500 . ? 
C50 C51 1.388(4) . ? 
C50 H50 0.9500 . ? 
C51 H51 0.9500 . ? 
C52 C57 1.394(3) . ? 
C52 C53 1.395(3) . ? 
C52 P3 1.797(3) . ? 
C53 C54 1.380(4) . ? 
C53 H53 0.9500 . ? 
C54 C55 1.373(4) . ? 
C54 H54 0.9500 . ? 
C55 C56 1.390(4) . ? 
C55 H55 0.9500 . ? 
C56 C57 1.383(4) . ? 
C56 H56 0.9500 . ? 
C57 H57 0.9500 . ? 
C58 C59 1.391(3) . ? 
C58 C63 1.394(3) . ? 
C58 P3 1.789(2) . ? 
C59 C60 1.382(4) . ? 
C59 H59 0.9500 . ? 
C60 C61 1.383(4) . ? 
C60 H60 0.9500 . ? 
C61 C62 1.383(4) . ? 
C61 H61 0.9500 . ? 
C62 C63 1.385(4) . ? 
C62 H62 0.9500 . ? 
C63 H63 0.9500 . ? 
C64 O8 1.215(4) . ? 
C64 O7 1.323(4) . ? 
C64 C65 1.454(5) . ? 
C65 H65A 0.9800 . ? 
C65 H65B 0.9800 . ? 
C65 H65C 0.9800 . ? 
C66 O7 1.453(4) . ? 
C66 C67 1.505(5) . ? 
C66 H66A 0.9900 . ? 
C66 H66B 0.9900 . ? 
C67 H67A 0.9800 . ? 
C67 H67B 0.9800 . ? 
C67 H67C 0.9800 . ? 
N4 P1 1.661(2) . ? 
N4 H4N 0.87(3) . ? 
N5 P2 1.655(2) . ? 
N5 H5N 0.76(3) . ? 
N6 P3 1.665(2) . ? 
N6 H6N 0.86(3) . ? 
O4 P1 1.4843(18) . ? 
O5 P2 1.4885(18) . ? 
O6 P3 1.4895(17) . ? 
 
loop_ 
 _geom_angle_atom_site_label_1 
 _geom_angle_atom_site_label_2 
 _geom_angle_atom_site_label_3 
 _geom_angle 
 _geom_angle_site_symmetry_1 
 _geom_angle_site_symmetry_3 
 _geom_angle_publ_flag 
O1 C1 N2 122.5(2) . . ? 
O1 C1 C2 120.4(2) . . ? 
N2 C1 C2 117.1(2) . . ? 
C3 C2 C7 120.5(2) . . ? 
C3 C2 C1 118.5(2) . . ? 
C7 C2 C1 121.0(2) . . ? 
C2 C3 C4 120.7(2) . . ? 
C2 C3 H3 119.6 . . ? 
C4 C3 H3 119.6 . . ? 
C3 C4 C5 118.6(2) . . ? 
C3 C4 N4 118.7(2) . . ? 
C5 C4 N4 122.7(2) . . ? 
C6 C5 C4 120.0(2) . . ? 
C6 C5 H5 120.0 . . ? 
C4 C5 H5 120.0 . . ? 
C5 C6 C7 121.5(2) . . ? 
C5 C6 N1 119.1(2) . . ? 
C7 C6 N1 119.3(2) . . ? 
C6 C7 C2 118.3(2) . . ? 
C6 C7 H7 120.8 . . ? 
C2 C7 H7 120.8 . . ? 
O2 C8 N3 122.6(2) . . ? 
O2 C8 C9 121.4(2) . . ? 
N3 C8 C9 116.0(2) . . ? 
C14 C9 C10 120.2(2) . . ? 
C14 C9 C8 120.2(2) . . ? 
C10 C9 C8 119.6(2) . . ? 
C11 C10 C9 121.1(2) . . ? 
C11 C10 H10 119.4 . . ? 
C9 C10 H10 119.4 . . ? 
C10 C11 C12 118.4(2) . . ? 
C10 C11 N5 120.3(2) . . ? 
C12 C11 N5 121.3(2) . . ? 
C13 C12 C11 119.9(2) . . ? 
C13 C12 H12 120.1 . . ? 
C11 C12 H12 120.1 . . ? 
C12 C13 C14 121.9(2) . . ? 
C12 C13 N2 117.5(2) . . ? 
C14 C13 N2 120.4(2) . . ? 
C13 C14 C9 118.3(2) . . ? 
C13 C14 H14 120.8 . . ? 
C9 C14 H14 120.8 . . ? 
O3 C15 N1 122.7(2) . . ? 
O3 C15 C16 120.8(2) . . ? 
N1 C15 C16 116.5(2) . . ? 
C21 C16 C17 120.3(2) . . ? 
C21 C16 C15 120.2(2) . . ? 
C17 C16 C15 119.5(2) . . ? 
C18 C17 C16 119.0(2) . . ? 
C18 C17 H17 120.5 . . ? 
C16 C17 H17 120.5 . . ? 
C17 C18 C19 121.2(2) . . ? 
C17 C18 N3 120.2(2) . . ? 
C19 C18 N3 118.6(2) . . ? 
C18 C19 C20 120.6(2) . . ? 
C18 C19 H19 119.7 . . ? 
C20 C19 H19 119.7 . . ? 
C19 C20 C21 118.3(2) . . ? 
C19 C20 N6 122.2(2) . . ? 
C21 C20 N6 119.5(2) . . ? 
C16 C21 C20 120.6(2) . . ? 
C16 C21 H21 119.7 . . ? 
C20 C21 H21 119.7 . . ? 
N1 C22 C23 112.8(2) . . ? 
N1 C22 H22A 109.0 . . ? 
C23 C22 H22A 109.0 . . ? 
N1 C22 H22B 109.0 . . ? 
C23 C22 H22B 109.0 . . ? 
H22A C22 H22B 107.8 . . ? 
C22 C23 H23A 109.5 . . ? 
C22 C23 H23B 109.5 . . ? 
H23A C23 H23B 109.5 . . ? 
C22 C23 H23C 109.5 . . ? 
H23A C23 H23C 109.5 . . ? 
H23B C23 H23C 109.5 . . ? 
N2 C24 C25 112.4(2) . . ? 
N2 C24 H24A 109.1 . . ? 
C25 C24 H24A 109.1 . . ? 
N2 C24 H24B 109.1 . . ? 
C25 C24 H24B 109.1 . . ? 
H24A C24 H24B 107.9 . . ? 
C24 C25 H25A 109.5 . . ? 
C24 C25 H25B 109.5 . . ? 
H25A C25 H25B 109.5 . . ? 
C24 C25 H25C 109.5 . . ? 
H25A C25 H25C 109.5 . . ? 
H25B C25 H25C 109.5 . . ? 
N3 C26 C27 112.4(2) . . ? 
N3 C26 H26A 109.1 . . ? 
C27 C26 H26A 109.1 . . ? 
N3 C26 H26B 109.1 . . ? 
C27 C26 H26B 109.1 . . ? 
H26A C26 H26B 107.9 . . ? 
C26 C27 H27A 109.5 . . ? 
C26 C27 H27B 109.5 . . ? 
H27A C27 H27B 109.5 . . ? 
C26 C27 H27C 109.5 . . ? 
H27A C27 H27C 109.5 . . ? 
H27B C27 H27C 109.5 . . ? 
C33 C28 C29 118.7(2) . . ? 
C33 C28 P1 124.10(19) . . ? 
C29 C28 P1 117.24(19) . . ? 
C30 C29 C28 120.6(2) . . ? 
C30 C29 H29 119.7 . . ? 
C28 C29 H29 119.7 . . ? 
C29 C30 C31 120.0(2) . . ? 
C29 C30 H30 120.0 . . ? 
C31 C30 H30 120.0 . . ? 
C32 C31 C30 119.9(2) . . ? 
C32 C31 H31 120.0 . . ? 
C30 C31 H31 120.0 . . ? 
C31 C32 C33 120.4(3) . . ? 
C31 C32 H32 119.8 . . ? 
C33 C32 H32 119.8 . . ? 
C28 C33 C32 120.4(2) . . ? 
C28 C33 H33 119.8 . . ? 
C32 C33 H33 119.8 . . ? 
C35 C34 C39 119.7(2) . . ? 
C35 C34 P1 118.07(19) . . ? 
C39 C34 P1 122.2(2) . . ? 
C36 C35 C34 119.9(3) . . ? 
C36 C35 H35 120.1 . . ? 
C34 C35 H35 120.1 . . ? 
C37 C36 C35 120.2(3) . . ? 
C37 C36 H36 119.9 . . ? 
C35 C36 H36 119.9 . . ? 
C36 C37 C38 120.4(3) . . ? 
C36 C37 H37 119.8 . . ? 
C38 C37 H37 119.8 . . ? 
C37 C38 C39 119.7(3) . . ? 
C37 C38 H38 120.1 . . ? 
C39 C38 H38 120.1 . . ? 
C38 C39 C34 120.2(2) . . ? 
C38 C39 H39 119.9 . . ? 
C34 C39 H39 119.9 . . ? 
C45 C40 C41 118.2(2) . . ? 
C45 C40 P2 120.0(2) . . ? 
C41 C40 P2 121.77(19) . . ? 
C42 C41 C40 121.3(3) . . ? 
C42 C41 H41 119.4 . . ? 
C40 C41 H41 119.4 . . ? 
C43 C42 C41 119.6(3) . . ? 
C43 C42 H42 120.2 . . ? 
C41 C42 H42 120.2 . . ? 
C44 C43 C42 119.8(3) . . ? 
C44 C43 H43 120.1 . . ? 
C42 C43 H43 120.1 . . ? 
C43 C44 C45 120.7(3) . . ? 
C43 C44 H44 119.6 . . ? 
C45 C44 H44 119.6 . . ? 
C44 C45 C40 120.4(3) . . ? 
C44 C45 H45 119.8 . . ? 
C40 C45 H45 119.8 . . ? 
C47 C46 C51 118.5(2) . . ? 
C47 C46 P2 122.00(19) . . ? 
C51 C46 P2 119.5(2) . . ? 
C48 C47 C46 120.9(2) . . ? 
C48 C47 H47 119.6 . . ? 
C46 C47 H47 119.6 . . ? 
C49 C48 C47 119.7(3) . . ? 
C49 C48 H48 120.2 . . ? 
C47 C48 H48 120.2 . . ? 
C50 C49 C48 120.3(3) . . ? 
C50 C49 H49 119.8 . . ? 
C48 C49 H49 119.8 . . ? 
C49 C50 C51 120.2(3) . . ? 
C49 C50 H50 119.9 . . ? 
C51 C50 H50 119.9 . . ? 
C50 C51 C46 120.5(3) . . ? 
C50 C51 H51 119.8 . . ? 
C46 C51 H51 119.8 . . ? 
C57 C52 C53 118.8(2) . . ? 
C57 C52 P3 123.54(19) . . ? 
C53 C52 P3 117.62(19) . . ? 
C54 C53 C52 120.6(2) . . ? 
C54 C53 H53 119.7 . . ? 
C52 C53 H53 119.7 . . ? 
C55 C54 C53 120.0(3) . . ? 
C55 C54 H54 120.0 . . ? 
C53 C54 H54 120.0 . . ? 
C54 C55 C56 120.5(3) . . ? 
C54 C55 H55 119.8 . . ? 
C56 C55 H55 119.8 . . ? 
C57 C56 C55 119.7(3) . . ? 
C57 C56 H56 120.2 . . ? 
C55 C56 H56 120.2 . . ? 
C56 C57 C52 120.4(2) . . ? 
C56 C57 H57 119.8 . . ? 
C52 C57 H57 119.8 . . ? 
C59 C58 C63 119.6(2) . . ? 
C59 C58 P3 121.89(19) . . ? 
C63 C58 P3 118.48(19) . . ? 
C60 C59 C58 120.5(3) . . ? 
C60 C59 H59 119.8 . . ? 
C58 C59 H59 119.8 . . ? 
C59 C60 C61 119.6(3) . . ? 
C59 C60 H60 120.2 . . ? 
C61 C60 H60 120.2 . . ? 
C62 C61 C60 120.5(3) . . ? 
C62 C61 H61 119.7 . . ? 
C60 C61 H61 119.7 . . ? 
C61 C62 C63 120.0(3) . . ? 
C61 C62 H62 120.0 . . ? 
C63 C62 H62 120.0 . . ? 
C62 C63 C58 119.8(2) . . ? 
C62 C63 H63 120.1 . . ? 
C58 C63 H63 120.1 . . ? 
O8 C64 O7 122.1(4) . . ? 
O8 C64 C65 125.0(3) . . ? 
O7 C64 C65 112.8(3) . . ? 
C64 C65 H65A 109.5 . . ? 
C64 C65 H65B 109.5 . . ? 
H65A C65 H65B 109.5 . . ? 
C64 C65 H65C 109.5 . . ? 
H65A C65 H65C 109.5 . . ? 
H65B C65 H65C 109.5 . . ? 
O7 C66 C67 106.9(3) . . ? 
O7 C66 H66A 110.3 . . ? 
C67 C66 H66A 110.3 . . ? 
O7 C66 H66B 110.3 . . ? 
C67 C66 H66B 110.3 . . ? 
H66A C66 H66B 108.6 . . ? 
C66 C67 H67A 109.5 . . ? 
C66 C67 H67B 109.5 . . ? 
H67A C67 H67B 109.5 . . ? 
C66 C67 H67C 109.5 . . ? 
H67A C67 H67C 109.5 . . ? 
H67B C67 H67C 109.5 . . ? 
C15 N1 C6 122.2(2) . . ? 
C15 N1 C22 120.3(2) . . ? 
C6 N1 C22 117.4(2) . . ? 
C1 N2 C13 120.7(2) . . ? 
C1 N2 C24 118.8(2) . . ? 
C13 N2 C24 118.3(2) . . ? 
C8 N3 C18 121.5(2) . . ? 
C8 N3 C26 121.6(2) . . ? 
C18 N3 C26 116.80(19) . . ? 
C4 N4 P1 124.53(17) . . ? 
C4 N4 H4N 110.0(18) . . ? 
P1 N4 H4N 117.6(18) . . ? 
C11 N5 P2 125.41(19) . . ? 
C11 N5 H5N 117(2) . . ? 
P2 N5 H5N 113(2) . . ? 
C20 N6 P3 123.10(17) . . ? 
C20 N6 H6N 113.0(19) . . ? 
P3 N6 H6N 110.7(19) . . ? 
C64 O7 C66 116.4(3) . . ? 
O4 P1 N4 117.82(11) . . ? 
O4 P1 C34 112.45(11) . . ? 
N4 P1 C34 103.11(11) . . ? 
O4 P1 C28 109.99(11) . . ? 
N4 P1 C28 105.54(12) . . ? 
C34 P1 C28 107.15(11) . . ? 
O5 P2 N5 118.40(11) . . ? 
O5 P2 C46 111.81(11) . . ? 
N5 P2 C46 102.58(12) . . ? 
O5 P2 C40 110.90(11) . . ? 
N5 P2 C40 103.46(12) . . ? 
C46 P2 C40 108.93(11) . . ? 
O6 P3 N6 117.61(11) . . ? 
O6 P3 C58 112.64(11) . . ? 
N6 P3 C58 102.16(11) . . ? 
O6 P3 C52 109.25(11) . . ? 
N6 P3 C52 106.38(11) . . ? 
C58 P3 C52 108.20(12) . . ? 
 
_diffrn_measured_fraction_theta_max    0.890 
_diffrn_reflns_theta_full              25.50 
_diffrn_measured_fraction_theta_full   0.981 
_refine_diff_density_max    0.387 
_refine_diff_density_min   -0.390 
_refine_diff_density_rms    0.060 

#==END


data_compound1c 
 
_audit_creation_method            SHELXL-97 
_chemical_name_systematic 
; 
 ? 
; 
_chemical_name_common             ? 
_chemical_melting_point           ? 
_chemical_formula_moiety          ? 
_chemical_formula_sum 
 'C67 H63 N8 O6 P3' 
_chemical_formula_weight          1169.16 
 
loop_ 
 _atom_type_symbol 
 _atom_type_description 
 _atom_type_scat_dispersion_real 
 _atom_type_scat_dispersion_imag 
 _atom_type_scat_source 
 'C'  'C'   0.0033   0.0016 
 'International Tables Vol C Tables 4.2.6.8 and 6.1.1.4' 
 'H'  'H'   0.0000   0.0000 
 'International Tables Vol C Tables 4.2.6.8 and 6.1.1.4' 
 'N'  'N'   0.0061   0.0033 
 'International Tables Vol C Tables 4.2.6.8 and 6.1.1.4' 
 'O'  'O'   0.0106   0.0060 
 'International Tables Vol C Tables 4.2.6.8 and 6.1.1.4' 
 'P'  'P'   0.1023   0.0942 
 'International Tables Vol C Tables 4.2.6.8 and 6.1.1.4' 
 
_symmetry_cell_setting           'Triclinic'
_symmetry_space_group_name_H-M   'P-1   '
loop_ 
 _symmetry_equiv_pos_as_xyz 
 'x, y, z' 
 '-x, -y, -z' 
 
_cell_length_a                    13.731(3) 
_cell_length_b                    14.962(3) 
_cell_length_c                    15.117(3) 
_cell_angle_alpha                 94.572(3) 
_cell_angle_beta                  91.240(3) 
_cell_angle_gamma                 101.538(3) 
_cell_volume                      3031.0(12) 
_cell_formula_units_Z             2 
_cell_measurement_temperature     100 
_cell_measurement_reflns_used    5059
_cell_measurement_theta_min        2.54
_cell_measurement_theta_max       24.10
_exptl_crystal_description        'prismatic'
_exptl_crystal_colour             'colorless'
_exptl_crystal_size_max           0.10 
_exptl_crystal_size_mid           0.10 
_exptl_crystal_size_min           0.10 
_exptl_crystal_density_meas       ? 
_exptl_crystal_density_diffrn     1.281 
_exptl_crystal_density_method     'not measured' 
_exptl_crystal_F_000              1228 
_exptl_absorpt_coefficient_mu     0.158 
_exptl_absorpt_correction_type    empirical
_exptl_absorpt_correction_T_min   0.9844 
_exptl_absorpt_correction_T_max   0.9844 
_exptl_absorpt_process_details    
;
SADABS Sheldrick 1996
;
_exptl_special_details 
; 
 ? 
; 
 
_diffrn_ambient_temperature       100 
_diffrn_radiation_wavelength      0.71073 
_diffrn_radiation_type            MoK\a 
_diffrn_radiation_source          'sealed tube'
_diffrn_radiation_monochromator   'graphite'
_diffrn_measurement_device_type   'Bruker APEXII CCD area detector' 
_diffrn_measurement_method        'phi and omega scans' 
_diffrn_detector_area_resol_mean  8.333
_diffrn_standards_number          ? 
_diffrn_standards_interval_count  ? 
_diffrn_standards_interval_time   ? 
_diffrn_standards_decay_%         ? 
_diffrn_reflns_number             29548 
_diffrn_reflns_av_R_equivalents   0.0522 
_diffrn_reflns_av_sigmaI/netI     0.0747 
_diffrn_reflns_limit_h_min        -17 
_diffrn_reflns_limit_h_max        16 
_diffrn_reflns_limit_k_min        -18 
_diffrn_reflns_limit_k_max        18 
_diffrn_reflns_limit_l_min        -17 
_diffrn_reflns_limit_l_max        18 
_diffrn_reflns_theta_min          1.84 
_diffrn_reflns_theta_max          26.68 
_reflns_number_total              11442 
_reflns_number_gt                 7641 
_reflns_threshold_expression      >2sigma(I) 
 
_computing_data_collection        'APEX2 (Bruker AXS, 2006)'
_computing_cell_refinement        'APEX2 (Bruker AXS, 2006)'
_computing_data_reduction         'SAINT (Bruker AXS, 2004)'
_computing_structure_solution     'SHELXS-97 (Sheldrick, 1997)'
_computing_structure_refinement   'SHELXL-97 (Sheldrick, 1997)'
_computing_molecular_graphics     'XSHEL (Bruker AXS,2002)'
_computing_publication_material   'XCIF (Bruker AXS, 2001)' 
_refine_special_details 
; 
 Refinement of F^2^ against ALL reflections.  The weighted R-factor wR and 
 goodness of fit S are based on F^2^, conventional R-factors R are based 
 on F, with F set to zero for negative F^2^. The threshold expression of 
 F^2^ > 2sigma(F^2^) is used only for calculating R-factors(gt) etc. and is 
 not relevant to the choice of reflections for refinement.  R-factors based 
 on F^2^ are statistically about twice as large as those based on F, and R- 
 factors based on ALL data will be even larger. 
; 
 
_refine_ls_structure_factor_coef  Fsqd  
_refine_ls_matrix_type            full 
_refine_ls_weighting_scheme       calc  
_refine_ls_weighting_details 
 'calc w=1/[\s^2^(Fo^2^)+(0.0848P)^2^+0.0000P] where P=(Fo^2^+2Fc^2^)/3' 
_atom_sites_solution_primary      direct 
_atom_sites_solution_secondary    difmap 
_atom_sites_solution_hydrogens    geom 
_refine_ls_hydrogen_treatment     mixed
_refine_ls_extinction_method      none 
_refine_ls_extinction_coef        ? 
_refine_ls_number_reflns          11442 
_refine_ls_number_parameters      774 
_refine_ls_number_restraints      0 
_refine_ls_R_factor_all           0.0903 
_refine_ls_R_factor_gt            0.0539 
_refine_ls_wR_factor_ref          0.1572 
_refine_ls_wR_factor_gt           0.1387 
_refine_ls_goodness_of_fit_ref    1.046 
_refine_ls_restrained_S_all       1.046 
_refine_ls_shift/su_max           0.001 
_refine_ls_shift/su_mean          0.000 
 
loop_ 
 _atom_site_label 
 _atom_site_type_symbol 
 _atom_site_fract_x 
 _atom_site_fract_y 
 _atom_site_fract_z 
 _atom_site_U_iso_or_equiv 
 _atom_site_adp_type 
 _atom_site_occupancy 
 _atom_site_symmetry_multiplicity 
 _atom_site_calc_flag 
 _atom_site_refinement_flags 
 _atom_site_disorder_assembly 
 _atom_site_disorder_group 
P1 P 0.97759(5) 0.98329(5) 0.21082(4) 0.01956(18) Uani 1 1 d . . . 
P2 P 0.63717(5) 0.79776(5) 0.14483(5) 0.01970(18) Uani 1 1 d . . . 
P3 P 0.78976(5) 0.78548(5) 0.43892(5) 0.02125(18) Uani 1 1 d . . . 
O6 O 0.69916(14) 0.73471(13) 0.38747(12) 0.0259(5) Uani 1 1 d . . . 
O5 O 0.72748(13) 0.85306(13) 0.10849(12) 0.0233(4) Uani 1 1 d . . . 
O4 O 0.97205(14) 0.94612(12) 0.29936(12) 0.0227(4) Uani 1 1 d . . . 
O2 O 0.72914(15) 0.37482(13) 0.27859(13) 0.0312(5) Uani 1 1 d . . . 
O1 O 0.95379(16) 0.59694(15) -0.12169(13) 0.0362(5) Uani 1 1 d . . . 
O3 O 1.25662(16) 0.67163(17) 0.29229(14) 0.0425(6) Uani 1 1 d . . . 
N6 N 0.89856(18) 0.79485(17) 0.39110(15) 0.0217(5) Uani 1 1 d . . . 
N4 N 0.94150(19) 0.90995(16) 0.12164(15) 0.0217(5) Uani 1 1 d . . . 
N1 N 1.19016(16) 0.72735(16) 0.17485(15) 0.0240(5) Uani 1 1 d . . . 
N2 N 0.82805(17) 0.56117(16) -0.02790(14) 0.0233(5) Uani 1 1 d . . . 
N3 N 0.87713(17) 0.46821(15) 0.32043(15) 0.0253(6) Uani 1 1 d . . . 
N5 N 0.65071(17) 0.71030(16) 0.20109(16) 0.0219(5) Uani 1 1 d . . . 
C24 C 0.9440(2) 0.72148(18) 0.36203(17) 0.0209(6) Uani 1 1 d . . . 
C20 C 1.0813(2) 0.6674(2) 0.29144(17) 0.0232(6) Uani 1 1 d . . . 
C19 C 1.1837(2) 0.6887(2) 0.25328(19) 0.0270(7) Uani 1 1 d . . . 
C6 C 1.1025(2) 0.7388(2) 0.12642(17) 0.0224(6) Uani 1 1 d . . . 
C2 C 0.9690(2) 0.68324(19) 0.01967(17) 0.0219(6) Uani 1 1 d . . . 
C15 C 0.7000(2) 0.63966(18) 0.17023(18) 0.0212(6) Uani 1 1 d . . . 
C3 C 0.9336(2) 0.76332(18) 0.03701(17) 0.0200(6) Uani 1 1 d . . . 
H3 H 0.8764 0.7721 0.0051 0.024 Uiso 1 1 calc R . . 
C5 C 1.06784(19) 0.81905(18) 0.14379(17) 0.0202(6) Uani 1 1 d . . . 
H5 H 1.1034 0.8661 0.1851 0.024 Uiso 1 1 calc R . . 
C14 C 0.73544(19) 0.63203(19) 0.08497(18) 0.0212(6) Uani 1 1 d . . . 
H14 H 0.7213 0.6720 0.0428 0.025 Uiso 1 1 calc R . . 
C13 C 0.7907(2) 0.56724(19) 0.06106(18) 0.0227(6) Uani 1 1 d . . . 
C1 C 0.9171(2) 0.61047(19) -0.04970(18) 0.0239(6) Uani 1 1 d . . . 
C25 C 1.0381(2) 0.73855(19) 0.32718(17) 0.0221(6) Uani 1 1 d . . . 
H25 H 1.0738 0.7999 0.3277 0.026 Uiso 1 1 calc R . . 
C10 C 0.7905(2) 0.44614(19) 0.27190(18) 0.0238(6) Uani 1 1 d . . . 
C4 C 0.9818(2) 0.83098(18) 0.10129(17) 0.0195(6) Uani 1 1 d . . . 
C7 C 1.0544(2) 0.67075(19) 0.06417(17) 0.0237(6) Uani 1 1 d . . . 
H7 H 1.0791 0.6163 0.0520 0.028 Uiso 1 1 calc R . . 
C16 C 0.7146(2) 0.57571(19) 0.22898(18) 0.0232(6) Uani 1 1 d . . . 
H16 H 0.6851 0.5761 0.2852 0.028 Uiso 1 1 calc R . . 
C8 C 1.2865(2) 0.7587(2) 0.1344(2) 0.0287(7) Uani 1 1 d . . . 
H8A H 1.2846 0.7284 0.0736 0.034 Uiso 1 1 calc R . . 
H8B H 1.3396 0.7397 0.1694 0.034 Uiso 1 1 calc R . . 
C21 C 1.0301(2) 0.5773(2) 0.29079(17) 0.0250(7) Uani 1 1 d . . . 
H21 H 1.0590 0.5284 0.2668 0.030 Uiso 1 1 calc R . . 
C22 C 0.9367(2) 0.55988(18) 0.32561(17) 0.0221(6) Uani 1 1 d . . . 
C17 C 0.7669(2) 0.4952(2) -0.09500(18) 0.0288(7) Uani 1 1 d . . . 
H17A H 0.7410 0.4376 -0.0677 0.035 Uiso 1 1 calc R . . 
H17B H 0.8093 0.4810 -0.1442 0.035 Uiso 1 1 calc R . . 
C11 C 0.7725(2) 0.51108(18) 0.20550(18) 0.0219(6) Uani 1 1 d . . . 
C12 C 0.8122(2) 0.50723(19) 0.12119(17) 0.0233(6) Uani 1 1 d . . . 
H12 H 0.8530 0.4646 0.1052 0.028 Uiso 1 1 calc R . . 
C23 C 0.8939(2) 0.62989(18) 0.36372(17) 0.0230(6) Uani 1 1 d . . . 
H23 H 0.8314 0.6159 0.3907 0.028 Uiso 1 1 calc R . . 
C26 C 0.9007(3) 0.4056(2) 0.3852(2) 0.0374(8) Uani 1 1 d . . . 
H26A H 0.9738 0.4150 0.3941 0.045 Uiso 1 1 calc R . . 
H26B H 0.8759 0.3415 0.3608 0.045 Uiso 1 1 calc R . . 
C9 C 1.3122(2) 0.8623(2) 0.1301(2) 0.0361(8) Uani 1 1 d . . . 
H9A H 1.2643 0.8807 0.0897 0.054 Uiso 1 1 calc R . . 
H9B H 1.3794 0.8801 0.1082 0.054 Uiso 1 1 calc R . . 
H9C H 1.3093 0.8928 0.1895 0.054 Uiso 1 1 calc R . . 
C18 C 0.6797(2) 0.5319(2) -0.1324(2) 0.0365(8) Uani 1 1 d . . . 
H18A H 0.6353 0.5425 -0.0845 0.055 Uiso 1 1 calc R . . 
H18B H 0.6429 0.4870 -0.1782 0.055 Uiso 1 1 calc R . . 
H18C H 0.7049 0.5896 -0.1584 0.055 Uiso 1 1 calc R . . 
C27 C 0.8551(3) 0.4208(3) 0.4741(2) 0.0629(12) Uani 1 1 d . . . 
H27A H 0.8862 0.4813 0.5023 0.094 Uiso 1 1 calc R . . 
H27B H 0.8660 0.3735 0.5123 0.094 Uiso 1 1 calc R . . 
H27C H 0.7835 0.4174 0.4650 0.094 Uiso 1 1 calc R . . 
C28 C 1.1042(2) 1.03858(18) 0.19318(17) 0.0210(6) Uani 1 1 d . . . 
C40 C 0.5478(2) 0.75072(19) 0.05521(17) 0.0208(6) Uani 1 1 d . . . 
C58 C 0.7834(2) 0.90340(19) 0.46684(16) 0.0204(6) Uani 1 1 d . . . 
C46 C 0.5760(2) 0.86450(19) 0.22049(17) 0.0224(6) Uani 1 1 d . . . 
C45 C 0.5015(2) 0.6582(2) 0.04278(19) 0.0258(7) Uani 1 1 d . . . 
H45 H 0.5154 0.6169 0.0837 0.031 Uiso 1 1 calc R . . 
C62 C 0.6836(2) 1.0195(2) 0.47953(19) 0.0328(8) Uani 1 1 d . . . 
H62 H 0.6210 1.0367 0.4734 0.039 Uiso 1 1 calc R . . 
C33 C 1.1381(2) 1.0623(2) 0.11039(18) 0.0270(7) Uani 1 1 d . . . 
H33 H 1.0943 1.0477 0.0595 0.032 Uiso 1 1 calc R . . 
C60 C 0.8589(2) 1.0596(2) 0.51828(18) 0.0271(7) Uani 1 1 d . . . 
H60 H 0.9161 1.1043 0.5381 0.033 Uiso 1 1 calc R . . 
C59 C 0.8661(2) 0.96942(19) 0.49757(17) 0.0230(6) Uani 1 1 d . . . 
H59 H 0.9287 0.9523 0.5044 0.028 Uiso 1 1 calc R . . 
C29 C 1.1698(2) 1.0601(2) 0.26716(19) 0.0281(7) Uani 1 1 d . . . 
H29 H 1.1473 1.0438 0.3238 0.034 Uiso 1 1 calc R . . 
C39 C 0.8519(2) 1.09245(19) 0.27502(19) 0.0255(7) Uani 1 1 d . . . 
H39 H 0.8585 1.0657 0.3292 0.031 Uiso 1 1 calc R . . 
C34 C 0.8999(2) 1.06501(18) 0.20037(18) 0.0215(6) Uani 1 1 d . . . 
C47 C 0.6016(2) 0.9603(2) 0.22115(19) 0.0276(7) Uani 1 1 d . . . 
H47 H 0.6531 0.9880 0.1852 0.033 Uiso 1 1 calc R . . 
C51 C 0.5006(2) 0.8251(2) 0.27442(18) 0.0264(7) Uani 1 1 d . . . 
H51 H 0.4829 0.7604 0.2746 0.032 Uiso 1 1 calc R . . 
C52 C 0.8078(2) 0.7312(2) 0.53885(18) 0.0269(7) Uani 1 1 d . . . 
C41 C 0.5237(2) 0.8102(2) -0.00374(19) 0.0278(7) Uani 1 1 d . . . 
H41 H 0.5544 0.8733 0.0041 0.033 Uiso 1 1 calc R . . 
C49 C 0.4769(2) 0.9746(2) 0.3271(2) 0.0344(8) Uani 1 1 d . . . 
H49 H 0.4427 1.0121 0.3633 0.041 Uiso 1 1 calc R . . 
C44 C 0.4352(2) 0.6262(2) -0.02911(19) 0.0296(7) Uani 1 1 d . . . 
H44 H 0.4059 0.5629 -0.0385 0.036 Uiso 1 1 calc R . . 
C57 C 0.8910(2) 0.7630(2) 0.59535(19) 0.0313(7) Uani 1 1 d . . . 
H57 H 0.9388 0.8149 0.5817 0.038 Uiso 1 1 calc R . . 
C35 C 0.8901(2) 1.1048(2) 0.1216(2) 0.0330(7) Uani 1 1 d . . . 
H35 H 0.9230 1.0867 0.0706 0.040 Uiso 1 1 calc R . . 
C38 C 0.7950(2) 1.1581(2) 0.2709(2) 0.0340(8) Uani 1 1 d . . . 
H38 H 0.7623 1.1764 0.3219 0.041 Uiso 1 1 calc R . . 
C37 C 0.7856(2) 1.1974(2) 0.1920(2) 0.0387(8) Uani 1 1 d . . . 
H37 H 0.7466 1.2430 0.1891 0.046 Uiso 1 1 calc R . . 
C30 C 1.2669(2) 1.1048(2) 0.2591(2) 0.0354(8) Uani 1 1 d . . . 
H30 H 1.3110 1.1191 0.3099 0.042 Uiso 1 1 calc R . . 
C42 C 0.4553(2) 0.7788(2) -0.0742(2) 0.0335(8) Uani 1 1 d . . . 
H42 H 0.4383 0.8204 -0.1133 0.040 Uiso 1 1 calc R . . 
C61 C 0.7668(2) 1.0841(2) 0.50971(18) 0.0299(7) Uani 1 1 d . . . 
H61 H 0.7610 1.1456 0.5247 0.036 Uiso 1 1 calc R . . 
C50 C 0.4515(2) 0.8800(2) 0.32748(19) 0.0318(7) Uani 1 1 d . . . 
H50 H 0.4005 0.8531 0.3642 0.038 Uiso 1 1 calc R . . 
C63 C 0.6919(2) 0.9296(2) 0.45831(18) 0.0287(7) Uani 1 1 d . . . 
H63 H 0.6347 0.8853 0.4377 0.034 Uiso 1 1 calc R . . 
C32 C 1.2357(2) 1.1072(2) 0.1023(2) 0.0362(8) Uani 1 1 d . . . 
H32 H 1.2588 1.1234 0.0458 0.043 Uiso 1 1 calc R . . 
C43 C 0.4123(2) 0.6868(2) -0.0868(2) 0.0350(8) Uani 1 1 d . . . 
H43 H 0.3665 0.6651 -0.1354 0.042 Uiso 1 1 calc R . . 
C31 C 1.2998(2) 1.1285(2) 0.1767(2) 0.0398(8) Uani 1 1 d . . . 
H31 H 1.3665 1.1596 0.1710 0.048 Uiso 1 1 calc R . . 
C48 C 0.5512(2) 1.0142(2) 0.2745(2) 0.0337(8) Uani 1 1 d . . . 
H48 H 0.5681 1.0790 0.2748 0.040 Uiso 1 1 calc R . . 
C53 C 0.7388(3) 0.6536(2) 0.5585(2) 0.0396(8) Uani 1 1 d . . . 
H53 H 0.6817 0.6313 0.5205 0.048 Uiso 1 1 calc R . . 
C36 C 0.8331(3) 1.1703(2) 0.1172(2) 0.0426(9) Uani 1 1 d . . . 
H36 H 0.8262 1.1970 0.0630 0.051 Uiso 1 1 calc R . . 
C55 C 0.8364(3) 0.6423(3) 0.6893(2) 0.0447(9) Uani 1 1 d . . . 
H55 H 0.8463 0.6116 0.7404 0.054 Uiso 1 1 calc R . . 
C56 C 0.9049(3) 0.7203(2) 0.6710(2) 0.0404(8) Uani 1 1 d . . . 
H56 H 0.9608 0.7438 0.7102 0.049 Uiso 1 1 calc R . . 
C54 C 0.7535(3) 0.6097(3) 0.6327(2) 0.0499(10) Uani 1 1 d . . . 
H54 H 0.7067 0.5567 0.6454 0.060 Uiso 1 1 calc R . . 
C64 C 0.5137(4) 0.4198(4) 0.3405(4) 0.0926(17) Uani 1 1 d . . . 
C65 C 0.4801(4) 0.3362(4) 0.2897(3) 0.0945(18) Uani 1 1 d . . . 
H65A H 0.5129 0.2895 0.3119 0.142 Uiso 1 1 calc R . . 
H65B H 0.4958 0.3434 0.2275 0.142 Uiso 1 1 calc R . . 
H65C H 0.4079 0.3173 0.2944 0.142 Uiso 1 1 calc R . . 
N7 N 0.5420(5) 0.4888(4) 0.3854(5) 0.159(3) Uani 1 1 d . . . 
C67 C 0.4417(4) 0.6636(3) 0.4446(3) 0.0699(13) Uani 1 1 d . . . 
H67A H 0.5042 0.6729 0.4132 0.105 Uiso 1 1 calc R . . 
H67B H 0.3858 0.6594 0.4020 0.105 Uiso 1 1 calc R . . 
H67C H 0.4339 0.6069 0.4743 0.105 Uiso 1 1 calc R . . 
N8 N 0.4501(5) 0.8017(3) 0.5652(3) 0.122(2) Uani 1 1 d . . . 
C66 C 0.4436(4) 0.7407(4) 0.5107(4) 0.0808(14) Uani 1 1 d . . . 
H5N H 0.657(2) 0.718(2) 0.262(2) 0.031(8) Uiso 1 1 d . . . 
H6N H 0.915(2) 0.844(2) 0.3643(19) 0.029(9) Uiso 1 1 d . . . 
H4N H 0.884(2) 0.904(2) 0.115(2) 0.028(9) Uiso 1 1 d . . . 
 
loop_ 
 _atom_site_aniso_label 
 _atom_site_aniso_U_11 
 _atom_site_aniso_U_22 
 _atom_site_aniso_U_33 
 _atom_site_aniso_U_23 
 _atom_site_aniso_U_13 
 _atom_site_aniso_U_12 
P1 0.0223(4) 0.0174(4) 0.0183(4) 0.0003(3) 0.0017(3) 0.0029(3) 
P2 0.0184(4) 0.0217(4) 0.0190(4) -0.0006(3) -0.0009(3) 0.0050(3) 
P3 0.0244(4) 0.0213(4) 0.0172(4) 0.0004(3) 0.0017(3) 0.0029(3) 
O6 0.0265(11) 0.0263(11) 0.0218(10) -0.0028(8) -0.0022(8) 0.0003(9) 
O5 0.0199(10) 0.0269(11) 0.0217(10) 0.0021(8) 0.0000(8) 0.0019(8) 
O4 0.0270(11) 0.0199(10) 0.0208(10) 0.0036(8) 0.0028(8) 0.0032(8) 
O2 0.0355(12) 0.0209(11) 0.0354(12) 0.0015(9) -0.0018(10) 0.0017(10) 
O1 0.0391(13) 0.0414(13) 0.0231(11) -0.0114(9) 0.0101(10) 0.0007(11) 
O3 0.0274(12) 0.0620(16) 0.0415(13) 0.0128(12) -0.0054(10) 0.0152(12) 
N6 0.0261(13) 0.0173(13) 0.0212(12) 0.0010(10) 0.0038(10) 0.0031(11) 
N4 0.0175(13) 0.0213(13) 0.0250(13) -0.0020(10) -0.0019(11) 0.0025(11) 
N1 0.0179(12) 0.0303(14) 0.0244(13) -0.0013(10) -0.0009(10) 0.0077(11) 
N2 0.0251(13) 0.0252(13) 0.0182(12) -0.0047(10) -0.0001(10) 0.0044(11) 
N3 0.0303(14) 0.0198(13) 0.0251(13) -0.0005(10) -0.0067(11) 0.0047(11) 
N5 0.0240(13) 0.0259(14) 0.0164(12) -0.0031(10) 0.0000(10) 0.0085(11) 
C24 0.0284(16) 0.0178(14) 0.0162(13) -0.0016(11) -0.0042(12) 0.0061(12) 
C20 0.0263(16) 0.0272(16) 0.0158(13) -0.0009(12) -0.0066(12) 0.0067(13) 
C19 0.0253(16) 0.0271(16) 0.0287(16) -0.0062(13) -0.0063(13) 0.0096(13) 
C6 0.0179(14) 0.0284(16) 0.0211(14) -0.0011(12) -0.0002(12) 0.0064(12) 
C2 0.0203(15) 0.0235(15) 0.0200(14) -0.0014(12) 0.0013(11) 0.0008(12) 
C15 0.0200(15) 0.0179(14) 0.0242(15) -0.0034(12) -0.0048(12) 0.0028(12) 
C3 0.0170(14) 0.0232(15) 0.0200(14) 0.0014(11) 0.0006(11) 0.0045(12) 
C5 0.0181(14) 0.0181(14) 0.0226(14) -0.0027(11) 0.0025(11) 0.0009(12) 
C14 0.0190(14) 0.0206(15) 0.0231(15) -0.0007(12) -0.0005(12) 0.0028(12) 
C13 0.0191(15) 0.0230(15) 0.0223(14) -0.0062(12) -0.0015(12) -0.0006(12) 
C1 0.0255(16) 0.0235(16) 0.0235(15) -0.0017(12) -0.0015(12) 0.0086(13) 
C25 0.0248(15) 0.0203(15) 0.0196(14) -0.0033(11) -0.0037(12) 0.0035(12) 
C10 0.0307(17) 0.0170(15) 0.0228(15) -0.0039(12) 0.0014(13) 0.0051(13) 
C4 0.0195(14) 0.0190(15) 0.0200(14) 0.0019(11) 0.0037(11) 0.0035(12) 
C7 0.0239(15) 0.0234(16) 0.0245(15) -0.0027(12) 0.0023(12) 0.0079(13) 
C16 0.0260(16) 0.0219(15) 0.0194(14) -0.0011(12) -0.0031(12) 0.0007(13) 
C8 0.0189(15) 0.0330(18) 0.0339(17) -0.0046(13) 0.0013(13) 0.0076(13) 
C21 0.0309(17) 0.0252(16) 0.0199(14) -0.0014(12) -0.0056(12) 0.0102(13) 
C22 0.0298(16) 0.0172(15) 0.0181(14) -0.0015(11) -0.0059(12) 0.0037(13) 
C17 0.0307(17) 0.0317(17) 0.0214(15) -0.0084(13) 0.0005(13) 0.0042(14) 
C11 0.0209(15) 0.0187(15) 0.0248(15) -0.0010(12) -0.0058(12) 0.0028(12) 
C12 0.0219(15) 0.0211(15) 0.0242(15) -0.0060(12) -0.0021(12) 0.0014(12) 
C23 0.0274(16) 0.0226(16) 0.0178(14) -0.0003(11) -0.0041(12) 0.0037(13) 
C26 0.051(2) 0.0191(16) 0.0404(19) 0.0054(14) -0.0163(16) 0.0033(15) 
C9 0.0230(17) 0.039(2) 0.0454(19) 0.0020(15) 0.0023(14) 0.0039(15) 
C18 0.0341(18) 0.045(2) 0.0266(17) 0.0000(14) -0.0032(14) 0.0009(16) 
C27 0.089(3) 0.059(3) 0.037(2) 0.0165(19) -0.008(2) 0.004(2) 
C28 0.0260(15) 0.0148(14) 0.0212(14) -0.0014(11) 0.0014(12) 0.0024(12) 
C40 0.0184(14) 0.0257(16) 0.0193(14) 0.0009(12) 0.0015(11) 0.0075(12) 
C58 0.0242(15) 0.0245(15) 0.0131(13) -0.0001(11) 0.0017(11) 0.0065(12) 
C46 0.0201(15) 0.0267(16) 0.0212(14) -0.0023(12) -0.0024(12) 0.0088(13) 
C45 0.0184(15) 0.0266(16) 0.0318(16) 0.0017(13) 0.0009(12) 0.0034(13) 
C62 0.0298(17) 0.0398(19) 0.0310(17) -0.0093(14) -0.0033(14) 0.0179(15) 
C33 0.0268(16) 0.0294(17) 0.0226(15) 0.0007(12) -0.0007(12) 0.0012(13) 
C60 0.0302(17) 0.0273(17) 0.0214(15) -0.0053(12) 0.0012(13) 0.0028(14) 
C59 0.0232(15) 0.0267(16) 0.0196(14) -0.0010(12) -0.0006(12) 0.0075(13) 
C29 0.0313(17) 0.0295(17) 0.0204(15) -0.0007(12) 0.0014(13) 0.0000(14) 
C39 0.0292(16) 0.0195(15) 0.0274(15) -0.0020(12) 0.0000(13) 0.0054(13) 
C34 0.0237(15) 0.0144(14) 0.0249(15) -0.0013(11) -0.0009(12) 0.0018(12) 
C47 0.0276(16) 0.0283(17) 0.0263(16) -0.0028(13) -0.0021(13) 0.0067(14) 
C51 0.0235(16) 0.0288(17) 0.0265(15) -0.0045(13) -0.0018(12) 0.0072(13) 
C52 0.0332(17) 0.0247(16) 0.0234(15) 0.0013(12) 0.0056(13) 0.0068(14) 
C41 0.0239(16) 0.0289(17) 0.0292(16) 0.0034(13) -0.0035(13) 0.0019(13) 
C49 0.0297(17) 0.045(2) 0.0302(17) -0.0118(15) -0.0005(14) 0.0180(16) 
C44 0.0209(15) 0.0308(17) 0.0335(17) -0.0063(14) -0.0007(13) 0.0003(13) 
C57 0.0402(19) 0.0257(17) 0.0281(16) 0.0056(13) 0.0000(14) 0.0054(15) 
C35 0.043(2) 0.0272(17) 0.0307(17) 0.0014(13) 0.0014(14) 0.0130(15) 
C38 0.0319(18) 0.0301(18) 0.0392(19) -0.0108(15) -0.0015(14) 0.0100(15) 
C37 0.039(2) 0.0239(17) 0.054(2) -0.0076(16) -0.0112(17) 0.0131(15) 
C30 0.0282(17) 0.047(2) 0.0258(16) -0.0007(14) -0.0075(13) -0.0018(15) 
C42 0.0258(17) 0.044(2) 0.0297(17) 0.0097(15) -0.0047(13) 0.0022(15) 
C61 0.0407(19) 0.0272(17) 0.0237(15) -0.0057(13) 0.0000(14) 0.0147(15) 
C50 0.0271(17) 0.040(2) 0.0290(16) -0.0032(14) 0.0031(13) 0.0108(15) 
C63 0.0251(16) 0.0356(18) 0.0245(15) -0.0056(13) -0.0017(13) 0.0078(14) 
C32 0.0330(18) 0.047(2) 0.0266(16) 0.0089(15) 0.0051(14) -0.0004(16) 
C43 0.0249(17) 0.049(2) 0.0270(17) -0.0041(15) -0.0057(13) 0.0013(16) 
C31 0.0253(17) 0.048(2) 0.0392(19) 0.0041(16) 0.0023(15) -0.0094(15) 
C48 0.0363(19) 0.0294(18) 0.0359(18) -0.0066(14) -0.0055(15) 0.0120(15) 
C53 0.0368(19) 0.047(2) 0.0350(18) 0.0149(16) 0.0071(15) 0.0028(17) 
C36 0.060(2) 0.0324(19) 0.039(2) 0.0069(15) -0.0088(17) 0.0165(18) 
C55 0.058(2) 0.053(2) 0.0305(18) 0.0202(17) 0.0121(17) 0.023(2) 
C56 0.052(2) 0.046(2) 0.0268(17) 0.0058(15) -0.0019(15) 0.0188(18) 
C54 0.052(2) 0.051(2) 0.049(2) 0.0283(19) 0.0138(19) 0.0068(19) 
C64 0.102(4) 0.081(4) 0.091(4) 0.010(3) 0.034(3) 0.005(3) 
C65 0.081(4) 0.115(5) 0.081(4) -0.028(3) 0.021(3) 0.014(3) 
N7 0.178(6) 0.076(4) 0.206(7) -0.018(4) 0.087(5) -0.013(4) 
C67 0.085(3) 0.065(3) 0.063(3) 0.007(2) -0.006(2) 0.023(3) 
N8 0.204(6) 0.070(3) 0.096(4) -0.013(3) 0.032(4) 0.039(4) 
C66 0.102(4) 0.070(3) 0.078(4) 0.023(3) 0.007(3) 0.029(3) 
 
_geom_special_details 
; 
 All esds (except the esd in the dihedral angle between two l.s. planes) 
 are estimated using the full covariance matrix.  The cell esds are taken 
 into account individually in the estimation of esds in distances, angles 
 and torsion angles; correlations between esds in cell parameters are only 
 used when they are defined by crystal symmetry.  An approximate (isotropic) 
 treatment of cell esds is used for estimating esds involving l.s. planes. 
; 
 
loop_ 
 _geom_bond_atom_site_label_1 
 _geom_bond_atom_site_label_2 
 _geom_bond_distance 
 _geom_bond_site_symmetry_2 
 _geom_bond_publ_flag 
P1 O4 1.4875(19) . ? 
P1 N4 1.669(2) . ? 
P1 C34 1.790(3) . ? 
P1 C28 1.805(3) . ? 
P2 O5 1.4885(19) . ? 
P2 N5 1.655(3) . ? 
P2 C46 1.790(3) . ? 
P2 C40 1.808(3) . ? 
P3 O6 1.4886(19) . ? 
P3 N6 1.659(2) . ? 
P3 C58 1.801(3) . ? 
P3 C52 1.807(3) . ? 
O2 C10 1.233(3) . ? 
O1 C1 1.228(3) . ? 
O3 C19 1.232(3) . ? 
N6 C24 1.413(3) . ? 
N6 H6N 0.86(3) . ? 
N4 C4 1.417(4) . ? 
N4 H4N 0.78(3) . ? 
N1 C19 1.357(4) . ? 
N1 C6 1.442(3) . ? 
N1 C8 1.475(4) . ? 
N2 C1 1.358(4) . ? 
N2 C13 1.452(3) . ? 
N2 C17 1.476(3) . ? 
N3 C10 1.352(4) . ? 
N3 C22 1.445(3) . ? 
N3 C26 1.481(4) . ? 
N5 C15 1.419(3) . ? 
N5 H5N 0.92(3) . ? 
C24 C25 1.390(4) . ? 
C24 C23 1.407(4) . ? 
C20 C21 1.389(4) . ? 
C20 C25 1.397(4) . ? 
C20 C19 1.516(4) . ? 
C6 C7 1.383(4) . ? 
C6 C5 1.386(4) . ? 
C2 C3 1.389(4) . ? 
C2 C7 1.391(4) . ? 
C2 C1 1.506(4) . ? 
C15 C14 1.392(4) . ? 
C15 C16 1.396(4) . ? 
C3 C4 1.398(4) . ? 
C3 H3 0.9500 . ? 
C5 C4 1.382(4) . ? 
C5 H5 0.9500 . ? 
C14 C13 1.377(4) . ? 
C14 H14 0.9500 . ? 
C13 C12 1.394(4) . ? 
C25 H25 0.9500 . ? 
C10 C11 1.501(4) . ? 
C7 H7 0.9500 . ? 
C16 C11 1.399(4) . ? 
C16 H16 0.9500 . ? 
C8 C9 1.528(4) . ? 
C8 H8A 0.9900 . ? 
C8 H8B 0.9900 . ? 
C21 C22 1.381(4) . ? 
C21 H21 0.9500 . ? 
C22 C23 1.392(4) . ? 
C17 C18 1.529(4) . ? 
C17 H17A 0.9900 . ? 
C17 H17B 0.9900 . ? 
C11 C12 1.399(4) . ? 
C12 H12 0.9500 . ? 
C23 H23 0.9500 . ? 
C26 C27 1.514(5) . ? 
C26 H26A 0.9900 . ? 
C26 H26B 0.9900 . ? 
C9 H9A 0.9800 . ? 
C9 H9B 0.9800 . ? 
C9 H9C 0.9800 . ? 
C18 H18A 0.9800 . ? 
C18 H18B 0.9800 . ? 
C18 H18C 0.9800 . ? 
C27 H27A 0.9800 . ? 
C27 H27B 0.9800 . ? 
C27 H27C 0.9800 . ? 
C28 C33 1.392(4) . ? 
C28 C29 1.396(4) . ? 
C40 C41 1.388(4) . ? 
C40 C45 1.399(4) . ? 
C58 C59 1.392(4) . ? 
C58 C63 1.394(4) . ? 
C46 C51 1.398(4) . ? 
C46 C47 1.405(4) . ? 
C45 C44 1.392(4) . ? 
C45 H45 0.9500 . ? 
C62 C61 1.383(4) . ? 
C62 C63 1.385(4) . ? 
C62 H62 0.9500 . ? 
C33 C32 1.387(4) . ? 
C33 H33 0.9500 . ? 
C60 C59 1.385(4) . ? 
C60 C61 1.390(4) . ? 
C60 H60 0.9500 . ? 
C59 H59 0.9500 . ? 
C29 C30 1.379(4) . ? 
C29 H29 0.9500 . ? 
C39 C38 1.376(4) . ? 
C39 C34 1.394(4) . ? 
C39 H39 0.9500 . ? 
C34 C35 1.388(4) . ? 
C47 C48 1.388(4) . ? 
C47 H47 0.9500 . ? 
C51 C50 1.383(4) . ? 
C51 H51 0.9500 . ? 
C52 C57 1.392(4) . ? 
C52 C53 1.399(4) . ? 
C41 C42 1.392(4) . ? 
C41 H41 0.9500 . ? 
C49 C48 1.376(4) . ? 
C49 C50 1.388(4) . ? 
C49 H49 0.9500 . ? 
C44 C43 1.383(4) . ? 
C44 H44 0.9500 . ? 
C57 C56 1.382(4) . ? 
C57 H57 0.9500 . ? 
C35 C36 1.376(4) . ? 
C35 H35 0.9500 . ? 
C38 C37 1.385(5) . ? 
C38 H38 0.9500 . ? 
C37 C36 1.391(5) . ? 
C37 H37 0.9500 . ? 
C30 C31 1.383(4) . ? 
C30 H30 0.9500 . ? 
C42 C43 1.381(4) . ? 
C42 H42 0.9500 . ? 
C61 H61 0.9500 . ? 
C50 H50 0.9500 . ? 
C63 H63 0.9500 . ? 
C32 C31 1.389(4) . ? 
C32 H32 0.9500 . ? 
C43 H43 0.9500 . ? 
C31 H31 0.9500 . ? 
C48 H48 0.9500 . ? 
C53 C54 1.376(5) . ? 
C53 H53 0.9500 . ? 
C36 H36 0.9500 . ? 
C55 C54 1.391(5) . ? 
C55 C56 1.396(5) . ? 
C55 H55 0.9500 . ? 
C56 H56 0.9500 . ? 
C54 H54 0.9500 . ? 
C64 N7 1.181(7) . ? 
C64 C65 1.402(7) . ? 
C65 H65A 0.9800 . ? 
C65 H65B 0.9800 . ? 
C65 H65C 0.9800 . ? 
C67 C66 1.461(7) . ? 
C67 H67A 0.9800 . ? 
C67 H67B 0.9800 . ? 
C67 H67C 0.9800 . ? 
N8 C66 1.166(6) . ? 
 
loop_ 
 _geom_angle_atom_site_label_1 
 _geom_angle_atom_site_label_2 
 _geom_angle_atom_site_label_3 
 _geom_angle 
 _geom_angle_site_symmetry_1 
 _geom_angle_site_symmetry_3 
 _geom_angle_publ_flag 
O4 P1 N4 117.83(12) . . ? 
O4 P1 C34 112.46(12) . . ? 
N4 P1 C34 102.14(13) . . ? 
O4 P1 C28 109.44(12) . . ? 
N4 P1 C28 106.05(13) . . ? 
C34 P1 C28 108.30(13) . . ? 
O5 P2 N5 118.08(12) . . ? 
O5 P2 C46 112.60(12) . . ? 
N5 P2 C46 103.36(13) . . ? 
O5 P2 C40 109.60(11) . . ? 
N5 P2 C40 105.91(13) . . ? 
C46 P2 C40 106.46(12) . . ? 
O6 P3 N6 118.29(11) . . ? 
O6 P3 C58 111.64(12) . . ? 
N6 P3 C58 102.21(13) . . ? 
O6 P3 C52 110.55(13) . . ? 
N6 P3 C52 103.69(13) . . ? 
C58 P3 C52 109.84(12) . . ? 
C24 N6 P3 125.8(2) . . ? 
C24 N6 H6N 116(2) . . ? 
P3 N6 H6N 114(2) . . ? 
C4 N4 P1 123.4(2) . . ? 
C4 N4 H4N 116(2) . . ? 
P1 N4 H4N 108(2) . . ? 
C19 N1 C6 121.3(2) . . ? 
C19 N1 C8 121.9(2) . . ? 
C6 N1 C8 116.7(2) . . ? 
C1 N2 C13 122.7(2) . . ? 
C1 N2 C17 119.9(2) . . ? 
C13 N2 C17 117.3(2) . . ? 
C10 N3 C22 121.0(2) . . ? 
C10 N3 C26 119.8(2) . . ? 
C22 N3 C26 117.8(2) . . ? 
C15 N5 P2 124.8(2) . . ? 
C15 N5 H5N 108.7(18) . . ? 
P2 N5 H5N 119.8(18) . . ? 
C25 C24 C23 118.3(3) . . ? 
C25 C24 N6 120.3(2) . . ? 
C23 C24 N6 121.3(3) . . ? 
C21 C20 C25 119.9(3) . . ? 
C21 C20 C19 120.2(3) . . ? 
C25 C20 C19 119.9(3) . . ? 
O3 C19 N1 122.4(3) . . ? 
O3 C19 C20 121.0(3) . . ? 
N1 C19 C20 116.5(2) . . ? 
C7 C6 C5 121.0(3) . . ? 
C7 C6 N1 120.3(3) . . ? 
C5 C6 N1 118.7(2) . . ? 
C3 C2 C7 120.4(2) . . ? 
C3 C2 C1 120.2(2) . . ? 
C7 C2 C1 119.4(3) . . ? 
C14 C15 C16 118.7(3) . . ? 
C14 C15 N5 123.2(3) . . ? 
C16 C15 N5 118.1(2) . . ? 
C2 C3 C4 120.2(3) . . ? 
C2 C3 H3 119.9 . . ? 
C4 C3 H3 119.9 . . ? 
C4 C5 C6 120.3(2) . . ? 
C4 C5 H5 119.8 . . ? 
C6 C5 H5 119.8 . . ? 
C13 C14 C15 120.7(3) . . ? 
C13 C14 H14 119.6 . . ? 
C15 C14 H14 119.6 . . ? 
C14 C13 C12 121.1(3) . . ? 
C14 C13 N2 119.9(3) . . ? 
C12 C13 N2 119.1(2) . . ? 
O1 C1 N2 122.3(2) . . ? 
O1 C1 C2 121.5(3) . . ? 
N2 C1 C2 116.2(2) . . ? 
C24 C25 C20 121.4(3) . . ? 
C24 C25 H25 119.3 . . ? 
C20 C25 H25 119.3 . . ? 
O2 C10 N3 122.7(3) . . ? 
O2 C10 C11 120.1(3) . . ? 
N3 C10 C11 117.1(2) . . ? 
C5 C4 C3 119.0(2) . . ? 
C5 C4 N4 121.5(2) . . ? 
C3 C4 N4 119.5(2) . . ? 
C6 C7 C2 118.9(3) . . ? 
C6 C7 H7 120.5 . . ? 
C2 C7 H7 120.5 . . ? 
C15 C16 C11 120.4(3) . . ? 
C15 C16 H16 119.8 . . ? 
C11 C16 H16 119.8 . . ? 
N1 C8 C9 112.8(2) . . ? 
N1 C8 H8A 109.0 . . ? 
C9 C8 H8A 109.0 . . ? 
N1 C8 H8B 109.0 . . ? 
C9 C8 H8B 109.0 . . ? 
H8A C8 H8B 107.8 . . ? 
C22 C21 C20 118.9(3) . . ? 
C22 C21 H21 120.5 . . ? 
C20 C21 H21 120.5 . . ? 
C21 C22 C23 121.8(3) . . ? 
C21 C22 N3 121.2(2) . . ? 
C23 C22 N3 117.0(3) . . ? 
N2 C17 C18 112.3(2) . . ? 
N2 C17 H17A 109.1 . . ? 
C18 C17 H17A 109.1 . . ? 
N2 C17 H17B 109.1 . . ? 
C18 C17 H17B 109.1 . . ? 
H17A C17 H17B 107.9 . . ? 
C12 C11 C16 120.1(3) . . ? 
C12 C11 C10 120.9(3) . . ? 
C16 C11 C10 119.0(2) . . ? 
C13 C12 C11 118.6(3) . . ? 
C13 C12 H12 120.7 . . ? 
C11 C12 H12 120.7 . . ? 
C22 C23 C24 119.5(3) . . ? 
C22 C23 H23 120.3 . . ? 
C24 C23 H23 120.3 . . ? 
N3 C26 C27 112.4(3) . . ? 
N3 C26 H26A 109.1 . . ? 
C27 C26 H26A 109.1 . . ? 
N3 C26 H26B 109.1 . . ? 
C27 C26 H26B 109.1 . . ? 
H26A C26 H26B 107.9 . . ? 
C8 C9 H9A 109.5 . . ? 
C8 C9 H9B 109.5 . . ? 
H9A C9 H9B 109.5 . . ? 
C8 C9 H9C 109.5 . . ? 
H9A C9 H9C 109.5 . . ? 
H9B C9 H9C 109.5 . . ? 
C17 C18 H18A 109.5 . . ? 
C17 C18 H18B 109.5 . . ? 
H18A C18 H18B 109.5 . . ? 
C17 C18 H18C 109.5 . . ? 
H18A C18 H18C 109.5 . . ? 
H18B C18 H18C 109.5 . . ? 
C26 C27 H27A 109.5 . . ? 
C26 C27 H27B 109.5 . . ? 
H27A C27 H27B 109.5 . . ? 
C26 C27 H27C 109.5 . . ? 
H27A C27 H27C 109.5 . . ? 
H27B C27 H27C 109.5 . . ? 
C33 C28 C29 119.2(3) . . ? 
C33 C28 P1 123.2(2) . . ? 
C29 C28 P1 117.7(2) . . ? 
C41 C40 C45 118.7(3) . . ? 
C41 C40 P2 117.8(2) . . ? 
C45 C40 P2 123.5(2) . . ? 
C59 C58 C63 118.6(3) . . ? 
C59 C58 P3 122.5(2) . . ? 
C63 C58 P3 118.9(2) . . ? 
C51 C46 C47 119.3(3) . . ? 
C51 C46 P2 122.7(2) . . ? 
C47 C46 P2 118.0(2) . . ? 
C44 C45 C40 120.4(3) . . ? 
C44 C45 H45 119.8 . . ? 
C40 C45 H45 119.8 . . ? 
C61 C62 C63 119.7(3) . . ? 
C61 C62 H62 120.1 . . ? 
C63 C62 H62 120.1 . . ? 
C32 C33 C28 120.0(3) . . ? 
C32 C33 H33 120.0 . . ? 
C28 C33 H33 120.0 . . ? 
C59 C60 C61 119.2(3) . . ? 
C59 C60 H60 120.4 . . ? 
C61 C60 H60 120.4 . . ? 
C60 C59 C58 121.1(3) . . ? 
C60 C59 H59 119.4 . . ? 
C58 C59 H59 119.4 . . ? 
C30 C29 C28 120.9(3) . . ? 
C30 C29 H29 119.6 . . ? 
C28 C29 H29 119.6 . . ? 
C38 C39 C34 120.5(3) . . ? 
C38 C39 H39 119.8 . . ? 
C34 C39 H39 119.8 . . ? 
C35 C34 C39 119.4(3) . . ? 
C35 C34 P1 121.9(2) . . ? 
C39 C34 P1 118.6(2) . . ? 
C48 C47 C46 119.7(3) . . ? 
C48 C47 H47 120.2 . . ? 
C46 C47 H47 120.2 . . ? 
C50 C51 C46 120.2(3) . . ? 
C50 C51 H51 119.9 . . ? 
C46 C51 H51 119.9 . . ? 
C57 C52 C53 119.1(3) . . ? 
C57 C52 P3 121.2(2) . . ? 
C53 C52 P3 119.6(2) . . ? 
C40 C41 C42 120.9(3) . . ? 
C40 C41 H41 119.5 . . ? 
C42 C41 H41 119.5 . . ? 
C48 C49 C50 120.4(3) . . ? 
C48 C49 H49 119.8 . . ? 
C50 C49 H49 119.8 . . ? 
C43 C44 C45 119.8(3) . . ? 
C43 C44 H44 120.1 . . ? 
C45 C44 H44 120.1 . . ? 
C56 C57 C52 120.9(3) . . ? 
C56 C57 H57 119.6 . . ? 
C52 C57 H57 119.6 . . ? 
C36 C35 C34 120.3(3) . . ? 
C36 C35 H35 119.8 . . ? 
C34 C35 H35 119.8 . . ? 
C39 C38 C37 119.8(3) . . ? 
C39 C38 H38 120.1 . . ? 
C37 C38 H38 120.1 . . ? 
C38 C37 C36 120.1(3) . . ? 
C38 C37 H37 119.9 . . ? 
C36 C37 H37 119.9 . . ? 
C29 C30 C31 119.6(3) . . ? 
C29 C30 H30 120.2 . . ? 
C31 C30 H30 120.2 . . ? 
C43 C42 C41 119.6(3) . . ? 
C43 C42 H42 120.2 . . ? 
C41 C42 H42 120.2 . . ? 
C62 C61 C60 120.5(3) . . ? 
C62 C61 H61 119.7 . . ? 
C60 C61 H61 119.7 . . ? 
C51 C50 C49 120.0(3) . . ? 
C51 C50 H50 120.0 . . ? 
C49 C50 H50 120.0 . . ? 
C62 C63 C58 120.7(3) . . ? 
C62 C63 H63 119.6 . . ? 
C58 C63 H63 119.6 . . ? 
C33 C32 C31 120.1(3) . . ? 
C33 C32 H32 120.0 . . ? 
C31 C32 H32 120.0 . . ? 
C42 C43 C44 120.6(3) . . ? 
C42 C43 H43 119.7 . . ? 
C44 C43 H43 119.7 . . ? 
C30 C31 C32 120.3(3) . . ? 
C30 C31 H31 119.8 . . ? 
C32 C31 H31 119.8 . . ? 
C49 C48 C47 120.4(3) . . ? 
C49 C48 H48 119.8 . . ? 
C47 C48 H48 119.8 . . ? 
C54 C53 C52 120.2(3) . . ? 
C54 C53 H53 119.9 . . ? 
C52 C53 H53 119.9 . . ? 
C35 C36 C37 119.9(3) . . ? 
C35 C36 H36 120.0 . . ? 
C37 C36 H36 120.0 . . ? 
C54 C55 C56 119.9(3) . . ? 
C54 C55 H55 120.0 . . ? 
C56 C55 H55 120.0 . . ? 
C57 C56 C55 119.5(3) . . ? 
C57 C56 H56 120.3 . . ? 
C55 C56 H56 120.3 . . ? 
C53 C54 C55 120.4(3) . . ? 
C53 C54 H54 119.8 . . ? 
C55 C54 H54 119.8 . . ? 
N7 C64 C65 178.1(7) . . ? 
C64 C65 H65A 109.5 . . ? 
C64 C65 H65B 109.5 . . ? 
H65A C65 H65B 109.5 . . ? 
C64 C65 H65C 109.5 . . ? 
H65A C65 H65C 109.5 . . ? 
H65B C65 H65C 109.5 . . ? 
C66 C67 H67A 109.5 . . ? 
C66 C67 H67B 109.5 . . ? 
H67A C67 H67B 109.5 . . ? 
C66 C67 H67C 109.5 . . ? 
H67A C67 H67C 109.5 . . ? 
H67B C67 H67C 109.5 . . ? 
N8 C66 C67 176.3(6) . . ? 
 
_diffrn_measured_fraction_theta_max    0.896 
_diffrn_reflns_theta_full              25.50 
_diffrn_measured_fraction_theta_full   0.977 
_refine_diff_density_max    0.447 
_refine_diff_density_min   -0.516 
_refine_diff_density_rms    0.066 

#==END


data_compound1d

 
_audit_creation_method            SHELXL-97 
_chemical_name_systematic 
; 
 ? 
; 
_chemical_name_common             ? 
_chemical_melting_point           ? 
_chemical_formula_moiety          ? 
_chemical_formula_sum 
 'C66 H65 N6 O7 P3' 
_chemical_formula_weight          1147.15 
 
loop_ 
 _atom_type_symbol 
 _atom_type_description 
 _atom_type_scat_dispersion_real 
 _atom_type_scat_dispersion_imag 
 _atom_type_scat_source 
 'C'  'C'   0.0033   0.0016 
 'International Tables Vol C Tables 4.2.6.8 and 6.1.1.4' 
 'H'  'H'   0.0000   0.0000 
 'International Tables Vol C Tables 4.2.6.8 and 6.1.1.4' 
 'N'  'N'   0.0061   0.0033 
 'International Tables Vol C Tables 4.2.6.8 and 6.1.1.4' 
 'O'  'O'   0.0106   0.0060 
 'International Tables Vol C Tables 4.2.6.8 and 6.1.1.4' 
 'P'  'P'   0.1023   0.0942 
 'International Tables Vol C Tables 4.2.6.8 and 6.1.1.4' 
 
_symmetry_cell_setting           'Triclinic'
_symmetry_space_group_name_H-M   'P-1   '
loop_ 
 _symmetry_equiv_pos_as_xyz 
 'x, y, z' 
 '-x, -y, -z' 
 
_cell_length_a                    12.580(4) 
_cell_length_b                    13.197(4) 
_cell_length_c                    19.419(6) 
_cell_angle_alpha                 80.816(5) 
_cell_angle_beta                  80.935(4) 
_cell_angle_gamma                 69.837(4) 
_cell_volume                      2969.1(17) 
_cell_formula_units_Z             2 
_cell_measurement_temperature     100 
_cell_measurement_reflns_used    4040
_cell_measurement_theta_min        0.00
_cell_measurement_theta_max        0.00
_exptl_crystal_description        'prismatic'
_exptl_crystal_colour             'colorless'
_exptl_crystal_size_max           0.30 
_exptl_crystal_size_mid           0.20 
_exptl_crystal_size_min           0.15 
_exptl_crystal_density_meas       ? 
_exptl_crystal_density_diffrn     1.283 
_exptl_crystal_density_method     'not measured' 
_exptl_crystal_F_000              1208 
_exptl_absorpt_coefficient_mu     0.160 
_exptl_absorpt_correction_type    empirical
_exptl_absorpt_correction_T_min   0.9536 
_exptl_absorpt_correction_T_max   0.9764 
_exptl_absorpt_process_details    
;
SADABS Sheldrick 1996
;
_exptl_special_details 
; 
 ? 
; 
 
_diffrn_ambient_temperature       100 
_diffrn_radiation_wavelength      0.71073 
_diffrn_radiation_type            MoK\a 
_diffrn_radiation_source          'sealed tube'
_diffrn_radiation_monochromator   'graphite'
_diffrn_measurement_device_type   'Bruker APEXII CCD area detector' 
_diffrn_measurement_method        'phi and omega scans' 
_diffrn_detector_area_resol_mean  8.333
_diffrn_standards_number          ? 
_diffrn_standards_interval_count  ? 
_diffrn_standards_interval_time   ? 
_diffrn_standards_decay_%         ? 
_diffrn_reflns_number             15811 
_diffrn_reflns_av_R_equivalents   0.0443 
_diffrn_reflns_av_sigmaI/netI     0.0913 
_diffrn_reflns_limit_h_min        -14 
_diffrn_reflns_limit_h_max        15 
_diffrn_reflns_limit_k_min        -16 
_diffrn_reflns_limit_k_max        16 
_diffrn_reflns_limit_l_min        -9 
_diffrn_reflns_limit_l_max        25 
_diffrn_reflns_theta_min          1.07 
_diffrn_reflns_theta_max          27.96 
_reflns_number_total              12066 
_reflns_number_gt                 8226 
_reflns_threshold_expression      >2sigma(I) 
 
_computing_data_collection        'APEX2 (Bruker AXS, 2006)'
_computing_cell_refinement        'APEX2 (Bruker AXS, 2006)'
_computing_data_reduction         'SAINT (Bruker AXS, 2004)'
_computing_structure_solution     'SHELXS-97 (Sheldrick, 1997)'
_computing_structure_refinement   'SHELXL-97 (Sheldrick, 1997)'
_computing_molecular_graphics     'XSHEL (Bruker AXS,2002)'
_computing_publication_material   'XCIF (Bruker AXS, 2001)' 
_refine_special_details 
; 
 Refinement of F^2^ against ALL reflections.  The weighted R-factor wR and 
 goodness of fit S are based on F^2^, conventional R-factors R are based 
 on F, with F set to zero for negative F^2^. The threshold expression of 
 F^2^ > 2sigma(F^2^) is used only for calculating R-factors(gt) etc. and is 
 not relevant to the choice of reflections for refinement.  R-factors based 
 on F^2^ are statistically about twice as large as those based on F, and R- 
 factors based on ALL data will be even larger. 
; 
 
_refine_ls_structure_factor_coef  Fsqd  
_refine_ls_matrix_type            full 
_refine_ls_weighting_scheme       calc  
_refine_ls_weighting_details 
 'calc w=1/[\s^2^(Fo^2^)+(0.2000P)^2^+0.0000P] where P=(Fo^2^+2Fc^2^)/3' 
_atom_sites_solution_primary      direct 
_atom_sites_solution_secondary    difmap 
_atom_sites_solution_hydrogens    geom 
_refine_ls_hydrogen_treatment     mixed
_refine_ls_extinction_method      none 
_refine_ls_extinction_coef        ? 
_refine_ls_number_reflns          12066 
_refine_ls_number_parameters      757 
_refine_ls_number_restraints      0 
_refine_ls_R_factor_all           0.0931 
_refine_ls_R_factor_gt            0.0593 
_refine_ls_wR_factor_ref          0.2191 
_refine_ls_wR_factor_gt           0.1702 
_refine_ls_goodness_of_fit_ref    0.786 
_refine_ls_restrained_S_all       0.786 
_refine_ls_shift/su_max           0.000 
_refine_ls_shift/su_mean          0.000 
 
loop_ 
 _atom_site_label 
 _atom_site_type_symbol 
 _atom_site_fract_x 
 _atom_site_fract_y 
 _atom_site_fract_z 
 _atom_site_U_iso_or_equiv 
 _atom_site_adp_type 
 _atom_site_occupancy 
 _atom_site_symmetry_multiplicity 
 _atom_site_calc_flag 
 _atom_site_refinement_flags 
 _atom_site_disorder_assembly 
 _atom_site_disorder_group 
P1 P 0.44338(6) 0.19182(6) 0.22279(4) 0.01898(18) Uani 1 1 d . . . 
P3 P 0.80547(6) -0.02321(6) 0.32283(4) 0.01922(18) Uani 1 1 d . . . 
P2 P 0.74391(6) 0.38416(6) 0.07884(4) 0.0242(2) Uani 1 1 d . . . 
C1 C 0.5152(2) 0.2328(2) 0.54018(15) 0.0215(6) Uani 1 1 d . . . 
C5 C 0.3840(2) 0.3498(2) 0.34133(15) 0.0202(6) Uani 1 1 d . . . 
H5 H 0.3546 0.3761 0.2974 0.024 Uiso 1 1 calc R . . 
C7 C 0.4860(2) 0.2019(2) 0.42121(15) 0.0200(6) Uani 1 1 d . . . 
H7 H 0.5263 0.1269 0.4320 0.024 Uiso 1 1 calc R . . 
C3 C 0.4034(2) 0.3832(2) 0.45683(15) 0.0221(6) Uani 1 1 d . . . 
H3 H 0.3884 0.4315 0.4913 0.027 Uiso 1 1 calc R . . 
C4 C 0.3638(2) 0.4210(2) 0.39156(15) 0.0201(6) Uani 1 1 d . . . 
C6 C 0.4469(2) 0.2404(2) 0.35529(14) 0.0187(6) Uani 1 1 d . . . 
C2 C 0.4656(2) 0.2737(2) 0.47112(15) 0.0216(6) Uani 1 1 d . . . 
C8 C 0.1825(2) 0.5757(3) 0.40414(16) 0.0256(6) Uani 1 1 d . . . 
H8A H 0.1576 0.6560 0.3999 0.031 Uiso 1 1 calc R . . 
H8B H 0.1766 0.5487 0.4547 0.031 Uiso 1 1 calc R . . 
C9 C 0.1036(3) 0.5413(3) 0.36826(19) 0.0347(8) Uani 1 1 d . . . 
H9A H 0.1063 0.5708 0.3186 0.052 Uiso 1 1 calc R . . 
H9B H 0.0255 0.5691 0.3909 0.052 Uiso 1 1 calc R . . 
H9C H 0.1281 0.4618 0.3720 0.052 Uiso 1 1 calc R . . 
C15 C 0.6032(2) 0.4530(2) 0.19526(15) 0.0212(6) Uani 1 1 d . . . 
C10 C 0.3379(2) 0.5908(2) 0.31417(15) 0.0224(6) Uani 1 1 d . . . 
C13 C 0.6601(2) 0.5158(2) 0.28875(16) 0.0231(6) Uani 1 1 d . . . 
C16 C 0.4896(2) 0.4954(2) 0.22331(15) 0.0219(6) Uani 1 1 d . . . 
H16 H 0.4307 0.4908 0.2000 0.026 Uiso 1 1 calc R . . 
C11 C 0.4619(2) 0.5445(2) 0.28524(15) 0.0213(6) Uani 1 1 d . . . 
C14 C 0.6887(2) 0.4658(2) 0.22788(15) 0.0231(6) Uani 1 1 d . . . 
H14 H 0.7660 0.4403 0.2083 0.028 Uiso 1 1 calc R . . 
C12 C 0.5476(2) 0.5546(2) 0.31828(16) 0.0235(6) Uani 1 1 d . . . 
H12 H 0.5294 0.5877 0.3605 0.028 Uiso 1 1 calc R . . 
C17 C 0.7717(3) 0.6317(3) 0.30527(18) 0.0304(7) Uani 1 1 d . . . 
H17A H 0.8287 0.6324 0.3348 0.036 Uiso 1 1 calc R . . 
H17B H 0.7003 0.6912 0.3169 0.036 Uiso 1 1 calc R . . 
C19 C 0.8013(2) 0.4529(2) 0.37363(15) 0.0206(6) Uani 1 1 d . . . 
C24 C 0.8058(2) 0.1642(2) 0.36343(14) 0.0196(6) Uani 1 1 d . . . 
C21 C 0.7149(2) 0.3276(2) 0.45314(15) 0.0212(6) Uani 1 1 d . . . 
H21 H 0.6851 0.3823 0.4840 0.025 Uiso 1 1 calc R . . 
C22 C 0.6976(2) 0.2280(2) 0.47116(14) 0.0192(6) Uani 1 1 d . . . 
C23 C 0.7450(2) 0.1460(2) 0.42782(15) 0.0200(6) Uani 1 1 d . . . 
H23 H 0.7359 0.0769 0.4422 0.024 Uiso 1 1 calc R . . 
C20 C 0.7766(2) 0.3464(2) 0.38916(14) 0.0192(6) Uani 1 1 d . . . 
C25 C 0.8209(2) 0.2659(2) 0.34376(15) 0.0204(6) Uani 1 1 d . . . 
H25 H 0.8611 0.2800 0.2996 0.024 Uiso 1 1 calc R . . 
C26 C 0.6912(3) 0.1629(3) 0.59871(15) 0.0257(6) Uani 1 1 d . . . 
H26A H 0.6354 0.1734 0.6412 0.031 Uiso 1 1 calc R . . 
H26B H 0.7443 0.2025 0.6012 0.031 Uiso 1 1 calc R . . 
C27 C 0.7573(3) 0.0433(3) 0.59793(18) 0.0390(8) Uani 1 1 d . . . 
H27A H 0.7052 0.0039 0.5948 0.058 Uiso 1 1 calc R . . 
H27B H 0.7941 0.0154 0.6412 0.058 Uiso 1 1 calc R . . 
H27C H 0.8155 0.0329 0.5573 0.058 Uiso 1 1 calc R . . 
O2 O 0.27633(18) 0.67613(17) 0.28679(12) 0.0302(5) Uani 1 1 d . . . 
O1 O 0.45631(18) 0.2242(2) 0.59554(11) 0.0373(6) Uani 1 1 d . . . 
O3 O 0.8661(2) 0.46899(19) 0.40822(13) 0.0366(6) Uani 1 1 d . . . 
N3 N 0.63060(19) 0.20911(19) 0.53620(12) 0.0200(5) Uani 1 1 d . . . 
N2 N 0.7501(2) 0.5269(2) 0.32188(14) 0.0256(6) Uani 1 1 d . . . 
N1 N 0.3025(2) 0.53402(19) 0.37366(13) 0.0222(5) Uani 1 1 d . . . 
N5 N 0.6284(2) 0.3972(2) 0.13514(13) 0.0233(5) Uani 1 1 d . . . 
N4 N 0.4758(2) 0.1663(2) 0.30465(13) 0.0210(5) Uani 1 1 d . . . 
N6 N 0.8510(2) 0.08270(19) 0.31766(13) 0.0217(5) Uani 1 1 d . . . 
O6 O 0.68038(16) 0.00385(17) 0.32548(11) 0.0253(5) Uani 1 1 d . . . 
O4 O 0.49852(17) 0.25812(17) 0.16979(11) 0.0260(5) Uani 1 1 d . . . 
O5 O 0.85599(18) 0.33065(19) 0.10603(12) 0.0338(5) Uani 1 1 d . . . 
C28 C 0.2907(2) 0.2573(2) 0.23067(15) 0.0203(6) Uani 1 1 d . . . 
C33 C 0.2194(2) 0.2252(2) 0.28547(16) 0.0244(6) Uani 1 1 d . . . 
H33 H 0.2507 0.1654 0.3189 0.029 Uiso 1 1 calc R . . 
C34 C 0.4801(2) 0.0559(2) 0.19899(15) 0.0213(6) Uani 1 1 d . . . 
C39 C 0.4801(2) -0.0345(2) 0.24667(16) 0.0253(6) Uani 1 1 d . . . 
H39 H 0.4596 -0.0263 0.2952 0.030 Uiso 1 1 calc R . . 
C29 C 0.2444(3) 0.3448(2) 0.18173(16) 0.0251(6) Uani 1 1 d . . . 
H29 H 0.2926 0.3671 0.1441 0.030 Uiso 1 1 calc R . . 
C32 C 0.1025(3) 0.2800(3) 0.29179(17) 0.0291(7) Uani 1 1 d . . . 
H32 H 0.0543 0.2580 0.3295 0.035 Uiso 1 1 calc R . . 
C31 C 0.0572(3) 0.3667(3) 0.24277(18) 0.0320(7) Uani 1 1 d . . . 
H31 H -0.0227 0.4038 0.2468 0.038 Uiso 1 1 calc R . . 
C35 C 0.5114(3) 0.0427(3) 0.12790(17) 0.0343(8) Uani 1 1 d . . . 
H35 H 0.5122 0.1037 0.0947 0.041 Uiso 1 1 calc R . . 
C30 C 0.1267(3) 0.4001(3) 0.18790(18) 0.0333(7) Uani 1 1 d . . . 
H30 H 0.0949 0.4601 0.1547 0.040 Uiso 1 1 calc R . . 
C37 C 0.5401(3) -0.1489(3) 0.15371(18) 0.0348(8) Uani 1 1 d . . . 
H37 H 0.5601 -0.2185 0.1383 0.042 Uiso 1 1 calc R . . 
C36 C 0.5414(4) -0.0597(3) 0.10549(18) 0.0443(9) Uani 1 1 d . . . 
H36 H 0.5628 -0.0684 0.0571 0.053 Uiso 1 1 calc R . . 
C38 C 0.5096(3) -0.1364(3) 0.22465(17) 0.0296(7) Uani 1 1 d . . . 
H38 H 0.5090 -0.1975 0.2578 0.035 Uiso 1 1 calc R . . 
C46 C 0.7200(2) 0.3100(3) 0.01607(16) 0.0266(7) Uani 1 1 d . . . 
C40 C 0.7327(3) 0.5205(3) 0.04117(16) 0.0263(6) Uani 1 1 d . . . 
C51 C 0.7288(3) 0.2019(3) 0.03745(19) 0.0373(8) Uani 1 1 d . . . 
H51 H 0.7465 0.1707 0.0835 0.045 Uiso 1 1 calc R . . 
C47 C 0.6954(3) 0.3544(3) -0.05242(17) 0.0316(7) Uani 1 1 d . . . 
H47 H 0.6897 0.4279 -0.0679 0.038 Uiso 1 1 calc R . . 
C41 C 0.6280(3) 0.5967(3) 0.02634(17) 0.0323(7) Uani 1 1 d . . . 
H41 H 0.5611 0.5767 0.0356 0.039 Uiso 1 1 calc R . . 
C42 C 0.6214(3) 0.7017(3) -0.00186(18) 0.0381(8) Uani 1 1 d . . . 
H42 H 0.5499 0.7537 -0.0116 0.046 Uiso 1 1 calc R . . 
C49 C 0.6880(3) 0.1838(3) -0.0758(2) 0.0392(8) Uani 1 1 d . . . 
H49 H 0.6778 0.1404 -0.1071 0.047 Uiso 1 1 calc R . . 
C48 C 0.6792(3) 0.2905(3) -0.09777(18) 0.0361(8) Uani 1 1 d . . . 
H48 H 0.6620 0.3208 -0.1441 0.043 Uiso 1 1 calc R . . 
C45 C 0.8305(3) 0.5512(3) 0.02735(19) 0.0360(8) Uani 1 1 d . . . 
H45 H 0.9023 0.5000 0.0373 0.043 Uiso 1 1 calc R . . 
C43 C 0.7188(4) 0.7309(3) -0.01576(19) 0.0431(9) Uani 1 1 d . . . 
H43 H 0.7140 0.8028 -0.0357 0.052 Uiso 1 1 calc R . . 
C50 C 0.7118(3) 0.1396(3) -0.0082(2) 0.0434(9) Uani 1 1 d . . . 
H50 H 0.7164 0.0663 0.0070 0.052 Uiso 1 1 calc R . . 
C44 C 0.8227(4) 0.6568(3) -0.0010(2) 0.0451(9) Uani 1 1 d . . . 
H44 H 0.8891 0.6778 -0.0102 0.054 Uiso 1 1 calc R . . 
C52 C 0.8564(2) -0.1129(2) 0.39954(15) 0.0205(6) Uani 1 1 d . . . 
C57 C 0.7988(3) -0.1844(3) 0.43006(16) 0.0267(6) Uani 1 1 d . . . 
H57 H 0.7320 -0.1823 0.4121 0.032 Uiso 1 1 calc R . . 
C53 C 0.9534(2) -0.1148(2) 0.42714(15) 0.0242(6) Uani 1 1 d . . . 
H53 H 0.9927 -0.0654 0.4068 0.029 Uiso 1 1 calc R . . 
C55 C 0.9351(3) -0.2616(3) 0.51377(17) 0.0316(7) Uani 1 1 d . . . 
H55 H 0.9626 -0.3131 0.5524 0.038 Uiso 1 1 calc R . . 
C54 C 0.9921(3) -0.1892(3) 0.48438(17) 0.0293(7) Uani 1 1 d . . . 
H54 H 1.0577 -0.1904 0.5034 0.035 Uiso 1 1 calc R . . 
C56 C 0.8390(3) -0.2593(3) 0.48728(17) 0.0332(7) Uani 1 1 d . . . 
H56 H 0.8000 -0.3088 0.5079 0.040 Uiso 1 1 calc R . . 
C58 C 0.8829(2) -0.0885(2) 0.24671(15) 0.0222(6) Uani 1 1 d . . . 
C60 C 1.0457(3) -0.2160(3) 0.18886(17) 0.0309(7) Uani 1 1 d . . . 
H60 H 1.1186 -0.2702 0.1905 0.037 Uiso 1 1 calc R . . 
C59 C 0.9898(3) -0.1677(2) 0.24856(16) 0.0270(7) Uani 1 1 d . . . 
H59 H 1.0245 -0.1887 0.2910 0.032 Uiso 1 1 calc R . . 
C63 C 0.8321(3) -0.0592(3) 0.18467(16) 0.0299(7) Uani 1 1 d . . . 
H63 H 0.7588 -0.0058 0.1830 0.036 Uiso 1 1 calc R . . 
C61 C 0.9962(3) -0.1861(3) 0.12695(17) 0.0331(7) Uani 1 1 d . . . 
H61 H 1.0355 -0.2185 0.0859 0.040 Uiso 1 1 calc R . . 
C62 C 0.8894(3) -0.1087(3) 0.12492(17) 0.0358(8) Uani 1 1 d . . . 
H62 H 0.8546 -0.0890 0.0825 0.043 Uiso 1 1 calc R . . 
C65 C 0.0772(3) 0.1267(3) 0.15598(17) 0.0286(7) Uani 1 1 d . . . 
H65 H 0.1041 0.1907 0.1515 0.034 Uiso 1 1 calc R . . 
C64 C 0.0798(3) 0.0974(3) 0.08361(18) 0.0378(8) Uani 1 1 d . . . 
H64A H 0.0530 0.0351 0.0874 0.057 Uiso 1 1 calc R . . 
H64B H 0.1580 0.0787 0.0603 0.057 Uiso 1 1 calc R . . 
H64C H 0.0302 0.1595 0.0560 0.057 Uiso 1 1 calc R . . 
C66 C 0.1512(3) 0.0343(3) 0.2023(2) 0.0433(9) Uani 1 1 d . . . 
H66A H 0.1378 0.0534 0.2504 0.065 Uiso 1 1 calc R . . 
H66B H 0.2316 0.0213 0.1845 0.065 Uiso 1 1 calc R . . 
H66C H 0.1321 -0.0316 0.2020 0.065 Uiso 1 1 calc R . . 
O7 O -0.03717(18) 0.15474(19) 0.19108(12) 0.0334(5) Uani 1 1 d . . . 
H7A H -0.0808 0.2056 0.1665 0.050 Uiso 1 1 calc R . . 
C18 C 0.8147(3) 0.6523(3) 0.2285(2) 0.0428(9) Uani 1 1 d . . . 
H18A H 0.8883 0.5966 0.2177 0.064 Uiso 1 1 calc R . . 
H18B H 0.8239 0.7242 0.2194 0.064 Uiso 1 1 calc R . . 
H18C H 0.7597 0.6494 0.1990 0.064 Uiso 1 1 calc R . . 
H1A H 0.548(3) 0.108(3) 0.3127(18) 0.035(9) Uiso 1 1 d . . . 
H1B H 0.594(3) 0.354(3) 0.1366(18) 0.031(9) Uiso 1 1 d . . . 
H1C H 0.891(3) 0.100(3) 0.2760(17) 0.021(8) Uiso 1 1 d . . . 
 
loop_ 
 _atom_site_aniso_label 
 _atom_site_aniso_U_11 
 _atom_site_aniso_U_22 
 _atom_site_aniso_U_33 
 _atom_site_aniso_U_23 
 _atom_site_aniso_U_13 
 _atom_site_aniso_U_12 
P1 0.0187(4) 0.0187(4) 0.0199(4) -0.0055(3) -0.0005(3) -0.0058(3) 
P3 0.0195(4) 0.0175(4) 0.0194(4) -0.0032(3) -0.0013(3) -0.0044(3) 
P2 0.0202(4) 0.0233(4) 0.0257(4) -0.0006(3) 0.0012(3) -0.0053(3) 
C1 0.0233(14) 0.0227(15) 0.0195(14) -0.0055(11) 0.0007(12) -0.0087(12) 
C5 0.0172(13) 0.0246(15) 0.0202(14) -0.0057(11) -0.0003(11) -0.0078(12) 
C7 0.0170(13) 0.0208(14) 0.0207(14) -0.0041(11) 0.0003(11) -0.0046(11) 
C3 0.0206(14) 0.0236(15) 0.0222(15) -0.0090(12) 0.0040(12) -0.0071(12) 
C4 0.0166(13) 0.0185(14) 0.0239(14) -0.0053(11) 0.0029(11) -0.0053(11) 
C6 0.0162(13) 0.0213(14) 0.0203(14) -0.0064(11) -0.0001(11) -0.0073(11) 
C2 0.0167(13) 0.0264(16) 0.0215(14) -0.0062(12) 0.0041(11) -0.0081(12) 
C8 0.0212(14) 0.0246(16) 0.0285(16) -0.0083(13) 0.0024(12) -0.0043(12) 
C9 0.0258(16) 0.0372(19) 0.043(2) -0.0102(16) -0.0030(15) -0.0102(15) 
C15 0.0247(15) 0.0219(15) 0.0179(13) 0.0012(11) -0.0006(11) -0.0111(12) 
C10 0.0245(15) 0.0214(15) 0.0228(15) -0.0076(12) -0.0015(12) -0.0075(12) 
C13 0.0249(15) 0.0199(14) 0.0276(15) 0.0055(12) -0.0100(12) -0.0117(12) 
C16 0.0236(14) 0.0230(15) 0.0210(14) -0.0004(11) -0.0047(12) -0.0099(12) 
C11 0.0239(14) 0.0176(14) 0.0223(14) 0.0001(11) -0.0024(12) -0.0079(12) 
C14 0.0215(14) 0.0238(15) 0.0239(15) 0.0001(12) -0.0011(12) -0.0093(12) 
C12 0.0295(15) 0.0186(14) 0.0237(15) -0.0024(12) -0.0058(12) -0.0083(12) 
C17 0.0306(16) 0.0214(16) 0.0440(19) 0.0024(14) -0.0131(15) -0.0135(14) 
C19 0.0172(13) 0.0227(15) 0.0215(14) -0.0050(11) 0.0001(11) -0.0058(11) 
C24 0.0195(13) 0.0202(14) 0.0188(13) -0.0043(11) -0.0035(11) -0.0047(11) 
C21 0.0196(13) 0.0213(15) 0.0216(14) -0.0052(11) -0.0027(11) -0.0042(12) 
C22 0.0178(13) 0.0235(15) 0.0160(13) -0.0021(11) -0.0019(11) -0.0064(11) 
C23 0.0185(13) 0.0181(14) 0.0224(14) -0.0019(11) -0.0029(11) -0.0046(11) 
C20 0.0184(13) 0.0190(14) 0.0204(14) -0.0023(11) -0.0042(11) -0.0055(11) 
C25 0.0186(13) 0.0216(15) 0.0211(14) -0.0017(11) -0.0005(11) -0.0078(12) 
C26 0.0286(16) 0.0333(17) 0.0165(14) 0.0005(12) -0.0034(12) -0.0126(14) 
C27 0.046(2) 0.0340(19) 0.0314(18) 0.0092(15) -0.0154(16) -0.0067(16) 
O2 0.0303(12) 0.0233(12) 0.0328(12) -0.0031(9) -0.0074(10) -0.0018(10) 
O1 0.0270(11) 0.0681(18) 0.0187(11) -0.0056(11) 0.0034(9) -0.0201(12) 
O3 0.0426(14) 0.0330(13) 0.0437(14) 0.0074(11) -0.0235(11) -0.0215(11) 
N3 0.0215(12) 0.0240(13) 0.0140(11) -0.0011(9) 0.0011(9) -0.0086(10) 
N2 0.0286(13) 0.0200(13) 0.0335(14) 0.0015(11) -0.0106(11) -0.0136(11) 
N1 0.0216(12) 0.0204(13) 0.0236(13) -0.0068(10) 0.0002(10) -0.0048(10) 
N5 0.0248(13) 0.0259(14) 0.0222(13) -0.0061(10) 0.0034(10) -0.0132(11) 
N4 0.0192(12) 0.0178(12) 0.0239(13) -0.0074(10) -0.0042(10) -0.0003(10) 
N6 0.0269(13) 0.0195(12) 0.0177(12) -0.0039(10) 0.0048(10) -0.0086(11) 
O6 0.0199(10) 0.0235(11) 0.0324(12) -0.0060(9) -0.0057(9) -0.0045(9) 
O4 0.0253(11) 0.0266(11) 0.0266(11) -0.0052(9) 0.0024(9) -0.0107(9) 
O5 0.0222(11) 0.0328(13) 0.0412(14) 0.0014(10) -0.0028(10) -0.0051(10) 
C28 0.0209(14) 0.0184(14) 0.0228(14) -0.0072(11) -0.0026(11) -0.0057(11) 
C33 0.0246(15) 0.0248(16) 0.0242(15) -0.0002(12) -0.0025(12) -0.0096(13) 
C34 0.0186(13) 0.0193(14) 0.0246(15) -0.0047(12) -0.0024(12) -0.0036(11) 
C39 0.0263(15) 0.0246(16) 0.0239(15) -0.0078(12) 0.0038(12) -0.0075(13) 
C29 0.0268(15) 0.0236(15) 0.0237(15) -0.0040(12) -0.0029(12) -0.0062(13) 
C32 0.0227(15) 0.0359(18) 0.0303(17) -0.0069(14) 0.0001(13) -0.0117(14) 
C31 0.0227(15) 0.0315(18) 0.0391(19) -0.0097(15) -0.0045(14) -0.0025(13) 
C35 0.055(2) 0.0232(16) 0.0218(16) -0.0034(13) -0.0052(15) -0.0077(15) 
C30 0.0286(16) 0.0278(17) 0.0361(18) -0.0010(14) -0.0090(14) 0.0015(14) 
C37 0.046(2) 0.0218(16) 0.0333(18) -0.0111(14) -0.0076(16) -0.0022(15) 
C36 0.073(3) 0.0303(19) 0.0229(17) -0.0087(14) -0.0036(18) -0.0062(18) 
C38 0.0348(17) 0.0200(15) 0.0323(17) -0.0050(13) -0.0003(14) -0.0075(13) 
C46 0.0209(14) 0.0265(16) 0.0263(16) -0.0061(13) 0.0054(12) -0.0020(12) 
C40 0.0273(15) 0.0257(16) 0.0234(15) -0.0008(12) 0.0029(13) -0.0088(13) 
C51 0.048(2) 0.0249(17) 0.0324(18) -0.0065(14) 0.0069(16) -0.0065(16) 
C47 0.0258(16) 0.0301(18) 0.0338(18) -0.0045(14) 0.0012(14) -0.0043(14) 
C41 0.0297(17) 0.0300(17) 0.0308(17) -0.0026(14) 0.0033(14) -0.0048(14) 
C42 0.045(2) 0.0283(18) 0.0289(17) 0.0011(14) 0.0046(16) -0.0017(16) 
C49 0.0352(18) 0.041(2) 0.039(2) -0.0219(17) 0.0062(16) -0.0070(16) 
C48 0.0291(17) 0.043(2) 0.0307(18) -0.0094(15) 0.0001(14) -0.0045(15) 
C45 0.0303(17) 0.0366(19) 0.042(2) -0.0029(16) 0.0030(15) -0.0153(15) 
C43 0.064(3) 0.0268(18) 0.0350(19) -0.0040(15) 0.0069(18) -0.0158(18) 
C50 0.059(2) 0.0266(18) 0.040(2) -0.0121(16) 0.0086(18) -0.0116(17) 
C44 0.054(2) 0.042(2) 0.047(2) -0.0014(18) 0.0043(19) -0.030(2) 
C52 0.0187(13) 0.0210(14) 0.0197(14) -0.0066(11) 0.0026(11) -0.0041(11) 
C57 0.0271(15) 0.0268(16) 0.0263(16) -0.0027(13) -0.0015(13) -0.0098(13) 
C53 0.0215(14) 0.0255(16) 0.0245(15) -0.0034(12) -0.0021(12) -0.0059(12) 
C55 0.0313(17) 0.0288(17) 0.0239(16) 0.0028(13) -0.0021(13) 0.0009(14) 
C54 0.0219(15) 0.0345(18) 0.0269(16) -0.0062(14) -0.0042(13) -0.0017(13) 
C56 0.0365(18) 0.0288(17) 0.0313(17) 0.0068(14) -0.0009(14) -0.0126(15) 
C58 0.0240(14) 0.0200(14) 0.0237(14) -0.0045(12) -0.0008(12) -0.0083(12) 
C60 0.0261(16) 0.0281(17) 0.0332(18) -0.0072(14) 0.0046(14) -0.0039(14) 
C59 0.0276(15) 0.0266(16) 0.0241(15) -0.0047(13) -0.0019(13) -0.0049(13) 
C63 0.0363(17) 0.0232(16) 0.0259(16) -0.0039(13) -0.0030(14) -0.0038(14) 
C61 0.0426(19) 0.0314(18) 0.0261(16) -0.0098(14) 0.0066(14) -0.0145(16) 
C62 0.046(2) 0.039(2) 0.0231(16) -0.0051(14) -0.0029(15) -0.0144(17) 
C65 0.0273(16) 0.0249(16) 0.0324(17) -0.0087(13) 0.0050(13) -0.0084(13) 
C64 0.044(2) 0.0315(19) 0.0339(18) -0.0098(15) 0.0068(16) -0.0098(16) 
C66 0.041(2) 0.033(2) 0.055(2) -0.0084(17) -0.0158(18) -0.0062(16) 
O7 0.0303(12) 0.0334(13) 0.0269(12) 0.0018(10) 0.0083(10) -0.0057(10) 
C18 0.044(2) 0.0273(18) 0.054(2) -0.0021(17) 0.0152(18) -0.0170(16) 
 
_geom_special_details 
; 
 All esds (except the esd in the dihedral angle between two l.s. planes) 
 are estimated using the full covariance matrix.  The cell esds are taken 
 into account individually in the estimation of esds in distances, angles 
 and torsion angles; correlations between esds in cell parameters are only 
 used when they are defined by crystal symmetry.  An approximate (isotropic) 
 treatment of cell esds is used for estimating esds involving l.s. planes. 
; 
 
loop_ 
 _geom_bond_atom_site_label_1 
 _geom_bond_atom_site_label_2 
 _geom_bond_distance 
 _geom_bond_site_symmetry_2 
 _geom_bond_publ_flag 
P1 O4 1.487(2) . ? 
P1 N4 1.657(3) . ? 
P1 C28 1.807(3) . ? 
P1 C34 1.808(3) . ? 
P3 O6 1.483(2) . ? 
P3 N6 1.668(2) . ? 
P3 C52 1.802(3) . ? 
P3 C58 1.803(3) . ? 
P2 O5 1.481(2) . ? 
P2 N5 1.650(3) . ? 
P2 C40 1.797(3) . ? 
P2 C46 1.799(3) . ? 
C1 O1 1.219(3) . ? 
C1 N3 1.367(4) . ? 
C1 C2 1.510(4) . ? 
C5 C6 1.392(4) . ? 
C5 C4 1.396(4) . ? 
C5 H5 0.9500 . ? 
C7 C2 1.397(4) . ? 
C7 C6 1.399(4) . ? 
C7 H7 0.9500 . ? 
C3 C4 1.389(4) . ? 
C3 C2 1.393(4) . ? 
C3 H3 0.9500 . ? 
C4 N1 1.437(4) . ? 
C6 N4 1.417(3) . ? 
C8 N1 1.478(4) . ? 
C8 C9 1.518(4) . ? 
C8 H8A 0.9900 . ? 
C8 H8B 0.9900 . ? 
C9 H9A 0.9800 . ? 
C9 H9B 0.9800 . ? 
C9 H9C 0.9800 . ? 
C15 C16 1.398(4) . ? 
C15 C14 1.401(4) . ? 
C15 N5 1.416(4) . ? 
C10 O2 1.220(4) . ? 
C10 N1 1.374(4) . ? 
C10 C11 1.516(4) . ? 
C13 C14 1.383(4) . ? 
C13 C12 1.390(4) . ? 
C13 N2 1.446(3) . ? 
C16 C11 1.396(4) . ? 
C16 H16 0.9500 . ? 
C11 C12 1.391(4) . ? 
C14 H14 0.9500 . ? 
C12 H12 0.9500 . ? 
C17 N2 1.477(4) . ? 
C17 C18 1.518(5) . ? 
C17 H17A 0.9900 . ? 
C17 H17B 0.9900 . ? 
C19 O3 1.224(3) . ? 
C19 N2 1.355(4) . ? 
C19 C20 1.517(4) . ? 
C24 C23 1.392(4) . ? 
C24 C25 1.404(4) . ? 
C24 N6 1.412(3) . ? 
C21 C22 1.387(4) . ? 
C21 C20 1.392(4) . ? 
C21 H21 0.9500 . ? 
C22 C23 1.387(4) . ? 
C22 N3 1.441(3) . ? 
C23 H23 0.9500 . ? 
C20 C25 1.397(4) . ? 
C25 H25 0.9500 . ? 
C26 N3 1.470(4) . ? 
C26 C27 1.511(5) . ? 
C26 H26A 0.9900 . ? 
C26 H26B 0.9900 . ? 
C27 H27A 0.9800 . ? 
C27 H27B 0.9800 . ? 
C27 H27C 0.9800 . ? 
N5 H1B 0.82(3) . ? 
N4 H1A 0.99(4) . ? 
N6 H1C 0.93(3) . ? 
C28 C33 1.390(4) . ? 
C28 C29 1.392(4) . ? 
C33 C32 1.392(4) . ? 
C33 H33 0.9500 . ? 
C34 C39 1.388(4) . ? 
C34 C35 1.396(4) . ? 
C39 C38 1.386(4) . ? 
C39 H39 0.9500 . ? 
C29 C30 1.402(4) . ? 
C29 H29 0.9500 . ? 
C32 C31 1.384(5) . ? 
C32 H32 0.9500 . ? 
C31 C30 1.385(5) . ? 
C31 H31 0.9500 . ? 
C35 C36 1.393(4) . ? 
C35 H35 0.9500 . ? 
C30 H30 0.9500 . ? 
C37 C36 1.385(5) . ? 
C37 C38 1.391(5) . ? 
C37 H37 0.9500 . ? 
C36 H36 0.9500 . ? 
C38 H38 0.9500 . ? 
C46 C51 1.391(5) . ? 
C46 C47 1.401(5) . ? 
C40 C41 1.394(4) . ? 
C40 C45 1.399(4) . ? 
C51 C50 1.386(5) . ? 
C51 H51 0.9500 . ? 
C47 C48 1.392(5) . ? 
C47 H47 0.9500 . ? 
C41 C42 1.385(5) . ? 
C41 H41 0.9500 . ? 
C42 C43 1.382(5) . ? 
C42 H42 0.9500 . ? 
C49 C48 1.376(5) . ? 
C49 C50 1.382(5) . ? 
C49 H49 0.9500 . ? 
C48 H48 0.9500 . ? 
C45 C44 1.389(5) . ? 
C45 H45 0.9500 . ? 
C43 C44 1.377(6) . ? 
C43 H43 0.9500 . ? 
C50 H50 0.9500 . ? 
C44 H44 0.9500 . ? 
C52 C57 1.387(4) . ? 
C52 C53 1.399(4) . ? 
C57 C56 1.397(5) . ? 
C57 H57 0.9500 . ? 
C53 C54 1.389(4) . ? 
C53 H53 0.9500 . ? 
C55 C56 1.376(5) . ? 
C55 C54 1.387(5) . ? 
C55 H55 0.9500 . ? 
C54 H54 0.9500 . ? 
C56 H56 0.9500 . ? 
C58 C63 1.390(4) . ? 
C58 C59 1.391(4) . ? 
C60 C61 1.380(5) . ? 
C60 C59 1.384(4) . ? 
C60 H60 0.9500 . ? 
C59 H59 0.9500 . ? 
C63 C62 1.395(4) . ? 
C63 H63 0.9500 . ? 
C61 C62 1.382(5) . ? 
C61 H61 0.9500 . ? 
C62 H62 0.9500 . ? 
C65 O7 1.440(3) . ? 
C65 C64 1.508(4) . ? 
C65 C66 1.515(5) . ? 
C65 H65 1.0000 . ? 
C64 H64A 0.9800 . ? 
C64 H64B 0.9800 . ? 
C64 H64C 0.9800 . ? 
C66 H66A 0.9800 . ? 
C66 H66B 0.9800 . ? 
C66 H66C 0.9800 . ? 
O7 H7A 0.8400 . ? 
C18 H18A 0.9800 . ? 
C18 H18B 0.9800 . ? 
C18 H18C 0.9800 . ? 
 
loop_ 
 _geom_angle_atom_site_label_1 
 _geom_angle_atom_site_label_2 
 _geom_angle_atom_site_label_3 
 _geom_angle 
 _geom_angle_site_symmetry_1 
 _geom_angle_site_symmetry_3 
 _geom_angle_publ_flag 
O4 P1 N4 119.70(12) . . ? 
O4 P1 C28 109.55(13) . . ? 
N4 P1 C28 104.44(13) . . ? 
O4 P1 C34 110.87(13) . . ? 
N4 P1 C34 101.39(13) . . ? 
C28 P1 C34 110.39(12) . . ? 
O6 P3 N6 115.39(12) . . ? 
O6 P3 C52 110.21(13) . . ? 
N6 P3 C52 107.14(13) . . ? 
O6 P3 C58 113.05(12) . . ? 
N6 P3 C58 102.72(13) . . ? 
C52 P3 C58 107.79(13) . . ? 
O5 P2 N5 117.85(14) . . ? 
O5 P2 C40 109.47(14) . . ? 
N5 P2 C40 104.81(14) . . ? 
O5 P2 C46 112.52(14) . . ? 
N5 P2 C46 101.03(13) . . ? 
C40 P2 C46 110.66(15) . . ? 
O1 C1 N3 122.6(3) . . ? 
O1 C1 C2 122.4(3) . . ? 
N3 C1 C2 115.0(2) . . ? 
C6 C5 C4 120.4(3) . . ? 
C6 C5 H5 119.8 . . ? 
C4 C5 H5 119.8 . . ? 
C2 C7 C6 120.0(3) . . ? 
C2 C7 H7 120.0 . . ? 
C6 C7 H7 120.0 . . ? 
C4 C3 C2 119.2(2) . . ? 
C4 C3 H3 120.4 . . ? 
C2 C3 H3 120.4 . . ? 
C3 C4 C5 120.5(3) . . ? 
C3 C4 N1 121.1(2) . . ? 
C5 C4 N1 118.4(3) . . ? 
C5 C6 C7 119.2(2) . . ? 
C5 C6 N4 122.6(3) . . ? 
C7 C6 N4 118.1(3) . . ? 
C3 C2 C7 120.7(3) . . ? 
C3 C2 C1 119.7(2) . . ? 
C7 C2 C1 119.6(3) . . ? 
N1 C8 C9 112.3(2) . . ? 
N1 C8 H8A 109.1 . . ? 
C9 C8 H8A 109.1 . . ? 
N1 C8 H8B 109.1 . . ? 
C9 C8 H8B 109.1 . . ? 
H8A C8 H8B 107.9 . . ? 
C8 C9 H9A 109.5 . . ? 
C8 C9 H9B 109.5 . . ? 
H9A C9 H9B 109.5 . . ? 
C8 C9 H9C 109.5 . . ? 
H9A C9 H9C 109.5 . . ? 
H9B C9 H9C 109.5 . . ? 
C16 C15 C14 119.1(3) . . ? 
C16 C15 N5 118.9(2) . . ? 
C14 C15 N5 122.0(3) . . ? 
O2 C10 N1 123.2(3) . . ? 
O2 C10 C11 120.6(3) . . ? 
N1 C10 C11 116.1(3) . . ? 
C14 C13 C12 121.4(3) . . ? 
C14 C13 N2 118.6(3) . . ? 
C12 C13 N2 120.0(3) . . ? 
C11 C16 C15 120.5(3) . . ? 
C11 C16 H16 119.7 . . ? 
C15 C16 H16 119.7 . . ? 
C12 C11 C16 120.0(3) . . ? 
C12 C11 C10 120.5(2) . . ? 
C16 C11 C10 119.5(2) . . ? 
C13 C14 C15 119.7(3) . . ? 
C13 C14 H14 120.1 . . ? 
C15 C14 H14 120.1 . . ? 
C13 C12 C11 119.2(3) . . ? 
C13 C12 H12 120.4 . . ? 
C11 C12 H12 120.4 . . ? 
N2 C17 C18 112.3(3) . . ? 
N2 C17 H17A 109.1 . . ? 
C18 C17 H17A 109.1 . . ? 
N2 C17 H17B 109.1 . . ? 
C18 C17 H17B 109.1 . . ? 
H17A C17 H17B 107.9 . . ? 
O3 C19 N2 122.6(3) . . ? 
O3 C19 C20 119.1(3) . . ? 
N2 C19 C20 118.4(2) . . ? 
C23 C24 C25 119.0(2) . . ? 
C23 C24 N6 121.0(2) . . ? 
C25 C24 N6 119.9(3) . . ? 
C22 C21 C20 119.1(3) . . ? 
C22 C21 H21 120.5 . . ? 
C20 C21 H21 120.5 . . ? 
C21 C22 C23 120.9(3) . . ? 
C21 C22 N3 119.6(2) . . ? 
C23 C22 N3 119.5(2) . . ? 
C22 C23 C24 120.4(3) . . ? 
C22 C23 H23 119.8 . . ? 
C24 C23 H23 119.8 . . ? 
C21 C20 C25 120.5(3) . . ? 
C21 C20 C19 117.6(2) . . ? 
C25 C20 C19 121.7(3) . . ? 
C20 C25 C24 119.9(3) . . ? 
C20 C25 H25 120.0 . . ? 
C24 C25 H25 120.0 . . ? 
N3 C26 C27 112.2(2) . . ? 
N3 C26 H26A 109.2 . . ? 
C27 C26 H26A 109.2 . . ? 
N3 C26 H26B 109.2 . . ? 
C27 C26 H26B 109.2 . . ? 
H26A C26 H26B 107.9 . . ? 
C26 C27 H27A 109.5 . . ? 
C26 C27 H27B 109.5 . . ? 
H27A C27 H27B 109.5 . . ? 
C26 C27 H27C 109.5 . . ? 
H27A C27 H27C 109.5 . . ? 
H27B C27 H27C 109.5 . . ? 
C1 N3 C22 121.8(2) . . ? 
C1 N3 C26 120.9(2) . . ? 
C22 N3 C26 117.4(2) . . ? 
C19 N2 C13 122.5(2) . . ? 
C19 N2 C17 120.1(2) . . ? 
C13 N2 C17 116.7(2) . . ? 
C10 N1 C4 120.6(2) . . ? 
C10 N1 C8 118.4(2) . . ? 
C4 N1 C8 117.4(2) . . ? 
C15 N5 P2 124.3(2) . . ? 
C15 N5 H1B 115(2) . . ? 
P2 N5 H1B 118(2) . . ? 
C6 N4 P1 127.6(2) . . ? 
C6 N4 H1A 110.8(19) . . ? 
P1 N4 H1A 115(2) . . ? 
C24 N6 P3 123.4(2) . . ? 
C24 N6 H1C 116.2(19) . . ? 
P3 N6 H1C 117.9(18) . . ? 
C33 C28 C29 119.5(3) . . ? 
C33 C28 P1 121.9(2) . . ? 
C29 C28 P1 118.6(2) . . ? 
C28 C33 C32 120.6(3) . . ? 
C28 C33 H33 119.7 . . ? 
C32 C33 H33 119.7 . . ? 
C39 C34 C35 118.9(3) . . ? 
C39 C34 P1 124.2(2) . . ? 
C35 C34 P1 116.9(2) . . ? 
C38 C39 C34 121.1(3) . . ? 
C38 C39 H39 119.5 . . ? 
C34 C39 H39 119.5 . . ? 
C28 C29 C30 120.1(3) . . ? 
C28 C29 H29 120.0 . . ? 
C30 C29 H29 120.0 . . ? 
C31 C32 C33 119.5(3) . . ? 
C31 C32 H32 120.2 . . ? 
C33 C32 H32 120.2 . . ? 
C32 C31 C30 120.8(3) . . ? 
C32 C31 H31 119.6 . . ? 
C30 C31 H31 119.6 . . ? 
C36 C35 C34 120.3(3) . . ? 
C36 C35 H35 119.9 . . ? 
C34 C35 H35 119.9 . . ? 
C31 C30 C29 119.5(3) . . ? 
C31 C30 H30 120.2 . . ? 
C29 C30 H30 120.2 . . ? 
C36 C37 C38 120.0(3) . . ? 
C36 C37 H37 120.0 . . ? 
C38 C37 H37 120.0 . . ? 
C37 C36 C35 120.1(3) . . ? 
C37 C36 H36 120.0 . . ? 
C35 C36 H36 120.0 . . ? 
C39 C38 C37 119.7(3) . . ? 
C39 C38 H38 120.2 . . ? 
C37 C38 H38 120.2 . . ? 
C51 C46 C47 119.2(3) . . ? 
C51 C46 P2 117.1(3) . . ? 
C47 C46 P2 123.8(2) . . ? 
C41 C40 C45 119.3(3) . . ? 
C41 C40 P2 121.2(2) . . ? 
C45 C40 P2 119.4(3) . . ? 
C50 C51 C46 120.3(3) . . ? 
C50 C51 H51 119.9 . . ? 
C46 C51 H51 119.9 . . ? 
C48 C47 C46 119.9(3) . . ? 
C48 C47 H47 120.1 . . ? 
C46 C47 H47 120.1 . . ? 
C42 C41 C40 120.1(3) . . ? 
C42 C41 H41 119.9 . . ? 
C40 C41 H41 119.9 . . ? 
C43 C42 C41 120.0(3) . . ? 
C43 C42 H42 120.0 . . ? 
C41 C42 H42 120.0 . . ? 
C48 C49 C50 120.2(3) . . ? 
C48 C49 H49 119.9 . . ? 
C50 C49 H49 119.9 . . ? 
C49 C48 C47 120.3(3) . . ? 
C49 C48 H48 119.9 . . ? 
C47 C48 H48 119.9 . . ? 
C44 C45 C40 120.0(3) . . ? 
C44 C45 H45 120.0 . . ? 
C40 C45 H45 120.0 . . ? 
C44 C43 C42 120.5(3) . . ? 
C44 C43 H43 119.7 . . ? 
C42 C43 H43 119.7 . . ? 
C49 C50 C51 120.2(3) . . ? 
C49 C50 H50 119.9 . . ? 
C51 C50 H50 119.9 . . ? 
C43 C44 C45 120.0(3) . . ? 
C43 C44 H44 120.0 . . ? 
C45 C44 H44 120.0 . . ? 
C57 C52 C53 119.8(3) . . ? 
C57 C52 P3 118.0(2) . . ? 
C53 C52 P3 122.1(2) . . ? 
C52 C57 C56 119.9(3) . . ? 
C52 C57 H57 120.0 . . ? 
C56 C57 H57 120.0 . . ? 
C54 C53 C52 119.7(3) . . ? 
C54 C53 H53 120.1 . . ? 
C52 C53 H53 120.1 . . ? 
C56 C55 C54 120.4(3) . . ? 
C56 C55 H55 119.8 . . ? 
C54 C55 H55 119.8 . . ? 
C55 C54 C53 120.1(3) . . ? 
C55 C54 H54 120.0 . . ? 
C53 C54 H54 120.0 . . ? 
C55 C56 C57 120.0(3) . . ? 
C55 C56 H56 120.0 . . ? 
C57 C56 H56 120.0 . . ? 
C63 C58 C59 119.5(3) . . ? 
C63 C58 P3 118.2(2) . . ? 
C59 C58 P3 122.3(2) . . ? 
C61 C60 C59 120.4(3) . . ? 
C61 C60 H60 119.8 . . ? 
C59 C60 H60 119.8 . . ? 
C60 C59 C58 120.3(3) . . ? 
C60 C59 H59 119.9 . . ? 
C58 C59 H59 119.9 . . ? 
C58 C63 C62 119.7(3) . . ? 
C58 C63 H63 120.2 . . ? 
C62 C63 H63 120.2 . . ? 
C60 C61 C62 119.7(3) . . ? 
C60 C61 H61 120.1 . . ? 
C62 C61 H61 120.1 . . ? 
C61 C62 C63 120.5(3) . . ? 
C61 C62 H62 119.8 . . ? 
C63 C62 H62 119.8 . . ? 
O7 C65 C64 110.4(3) . . ? 
O7 C65 C66 107.0(3) . . ? 
C64 C65 C66 112.7(3) . . ? 
O7 C65 H65 108.9 . . ? 
C64 C65 H65 108.9 . . ? 
C66 C65 H65 108.9 . . ? 
C65 C64 H64A 109.5 . . ? 
C65 C64 H64B 109.5 . . ? 
H64A C64 H64B 109.5 . . ? 
C65 C64 H64C 109.5 . . ? 
H64A C64 H64C 109.5 . . ? 
H64B C64 H64C 109.5 . . ? 
C65 C66 H66A 109.5 . . ? 
C65 C66 H66B 109.5 . . ? 
H66A C66 H66B 109.5 . . ? 
C65 C66 H66C 109.5 . . ? 
H66A C66 H66C 109.5 . . ? 
H66B C66 H66C 109.5 . . ? 
C65 O7 H7A 109.5 . . ? 
C17 C18 H18A 109.5 . . ? 
C17 C18 H18B 109.5 . . ? 
H18A C18 H18B 109.5 . . ? 
C17 C18 H18C 109.5 . . ? 
H18A C18 H18C 109.5 . . ? 
H18B C18 H18C 109.5 . . ? 
 
_diffrn_measured_fraction_theta_max    0.843 
_diffrn_reflns_theta_full              25.50 
_diffrn_measured_fraction_theta_full   0.970 
_refine_diff_density_max    0.682 
_refine_diff_density_min   -0.547 
_refine_diff_density_rms    0.085 

#==END


data_compound1e 
 
_audit_creation_method            SHELXL-97 
_chemical_name_systematic 
; 
 ? 
; 
_chemical_name_common             ? 
_chemical_melting_point           ? 
_chemical_formula_moiety          ? 
_chemical_formula_sum 
 'C63 H57 N6 O9 P3' 
_chemical_formula_weight          1135.06 
 
loop_ 
 _atom_type_symbol 
 _atom_type_description 
 _atom_type_scat_dispersion_real 
 _atom_type_scat_dispersion_imag 
 _atom_type_scat_source 
 'C'  'C'   0.0033   0.0016 
 'International Tables Vol C Tables 4.2.6.8 and 6.1.1.4' 
 'H'  'H'   0.0000   0.0000 
 'International Tables Vol C Tables 4.2.6.8 and 6.1.1.4' 
 'N'  'N'   0.0061   0.0033 
 'International Tables Vol C Tables 4.2.6.8 and 6.1.1.4' 
 'O'  'O'   0.0106   0.0060 
 'International Tables Vol C Tables 4.2.6.8 and 6.1.1.4' 
 'P'  'P'   0.1023   0.0942 
 'International Tables Vol C Tables 4.2.6.8 and 6.1.1.4' 
 
_symmetry_cell_setting           'Trigonal'
_symmetry_space_group_name_H-M   'P3(1)   '
loop_ 
 _symmetry_equiv_pos_as_xyz 
 'x, y, z' 
 '-y, x-y, z+1/3' 
 '-x+y, -x, z+2/3' 
 
_cell_length_a                    13.914(3) 
_cell_length_b                    13.914(3) 
_cell_length_c                    28.339(7) 
_cell_angle_alpha                 90.00 
_cell_angle_beta                  90.00 
_cell_angle_gamma                 120.00 
_cell_volume                      4752(2) 
_cell_formula_units_Z             3 
_cell_measurement_temperature     100 
_cell_measurement_reflns_used    5448
_cell_measurement_theta_min        2.22
_cell_measurement_theta_max       18.97
_exptl_crystal_description        'prismatic'
_exptl_crystal_colour             'colorless'
_exptl_crystal_size_max           0.15 
_exptl_crystal_size_mid           0.15 
_exptl_crystal_size_min           0.15 
_exptl_crystal_density_meas       ? 
_exptl_crystal_density_diffrn     1.190 
_exptl_crystal_density_method     'not measured' 
_exptl_crystal_F_000              1782 
_exptl_absorpt_coefficient_mu     0.152 
_exptl_absorpt_correction_type    empirical
_exptl_absorpt_correction_T_min   0.9776 
_exptl_absorpt_correction_T_max   0.9776 
_exptl_absorpt_process_details    
;
SADABS Sheldrick 1996
;
_exptl_special_details 
; 
 ? 
; 
 
_diffrn_ambient_temperature       100 
_diffrn_radiation_wavelength      0.71073 
_diffrn_radiation_type            MoK\a 
_diffrn_radiation_source          'sealed tube'
_diffrn_radiation_monochromator   'graphite'
_diffrn_measurement_device_type   'Bruker APEXII CCD area detector' 
_diffrn_measurement_method        'phi and omega scans' 
_diffrn_detector_area_resol_mean  8.333
_diffrn_standards_number          ? 
_diffrn_standards_interval_count  ? 
_diffrn_standards_interval_time   ? 
_diffrn_standards_decay_%         ? 
_diffrn_reflns_number             47646 
_diffrn_reflns_av_R_equivalents   0.0654 
_diffrn_reflns_av_sigmaI/netI     0.0721 
_diffrn_reflns_limit_h_min        -16 
_diffrn_reflns_limit_h_max        17 
_diffrn_reflns_limit_k_min        -17 
_diffrn_reflns_limit_k_max        17 
_diffrn_reflns_limit_l_min        -34 
_diffrn_reflns_limit_l_max        35 
_diffrn_reflns_theta_min          1.69 
_diffrn_reflns_theta_max          26.82 
_reflns_number_total              12368 
_reflns_number_gt                 8539 
_reflns_threshold_expression      >2sigma(I) 
 
_computing_data_collection        'APEX2 (Bruker AXS, 2006)'
_computing_cell_refinement        'APEX2 (Bruker AXS, 2006)'
_computing_data_reduction         'SAINT (Bruker AXS, 2004)'
_computing_structure_solution     'SHELXS-97 (Sheldrick, 1997)'
_computing_structure_refinement   'SHELXL-97 (Sheldrick, 1997)'
_computing_molecular_graphics     'XSHEL (Bruker AXS,2002)'
_computing_publication_material   'XCIF (Bruker AXS, 2001)' 
_refine_special_details 
; 
 Refinement of F^2^ against ALL reflections.  The weighted R-factor wR and 
 goodness of fit S are based on F^2^, conventional R-factors R are based 
 on F, with F set to zero for negative F^2^. The threshold expression of 
 F^2^ > 2sigma(F^2^) is used only for calculating R-factors(gt) etc. and is 
 not relevant to the choice of reflections for refinement.  R-factors based 
 on F^2^ are statistically about twice as large as those based on F, and R- 
 factors based on ALL data will be even larger. 
; 
 
_refine_ls_structure_factor_coef  Fsqd  
_refine_ls_matrix_type            full 
_refine_ls_weighting_scheme       calc  
_refine_ls_weighting_details 
 'calc w=1/[\s^2^(Fo^2^)+(0.2000P)^2^+0.0000P] where P=(Fo^2^+2Fc^2^)/3' 
_atom_sites_solution_primary      direct 
_atom_sites_solution_secondary    difmap 
_atom_sites_solution_hydrogens    geom 
_refine_ls_hydrogen_treatment     mixed
_refine_ls_extinction_method      SHELXL 
_refine_ls_extinction_coef        0.026(3) 
_refine_ls_extinction_expression 
 'Fc^*^=kFc[1+0.001xFc^2^\l^3^/sin(2\q)]^-1/4^' 
_refine_ls_abs_structure_details 
 'Flack H D (1983), Acta Cryst. A39, 876-881' 
_refine_ls_abs_structure_Flack    0.17(16) 
_refine_ls_number_reflns          12368 
_refine_ls_number_parameters      726 
_refine_ls_number_restraints      85 
_refine_ls_R_factor_all           0.1493 
_refine_ls_R_factor_gt            0.1137 
_refine_ls_wR_factor_ref          0.3204 
_refine_ls_wR_factor_gt           0.2886 
_refine_ls_goodness_of_fit_ref    1.196 
_refine_ls_restrained_S_all       1.200 
_refine_ls_shift/su_max           0.001 
_refine_ls_shift/su_mean          0.000 
 
loop_ 
 _atom_site_label 
 _atom_site_type_symbol 
 _atom_site_fract_x 
 _atom_site_fract_y 
 _atom_site_fract_z 
 _atom_site_U_iso_or_equiv 
 _atom_site_adp_type 
 _atom_site_occupancy 
 _atom_site_symmetry_multiplicity 
 _atom_site_calc_flag 
 _atom_site_refinement_flags 
 _atom_site_disorder_assembly 
 _atom_site_disorder_group 
C58 C 0.3763(9) 0.6372(6) 0.3448(2) 0.108(5) Uani 1 1 d GU . . 
C59 C 0.2798(7) 0.5931(7) 0.3716(3) 0.109(5) Uani 1 1 d GU . . 
H59 H 0.2337 0.6254 0.3702 0.131 Uiso 1 1 calc R . . 
C60 C 0.2507(7) 0.5017(7) 0.4004(3) 0.163(9) Uani 1 1 d GU . . 
H60 H 0.1848 0.4716 0.4187 0.196 Uiso 1 1 calc R . . 
C61 C 0.3182(10) 0.4545(6) 0.4025(3) 0.146(7) Uani 1 1 d GU . . 
H61 H 0.2983 0.3921 0.4222 0.175 Uiso 1 1 calc R . . 
C62 C 0.4147(12) 0.4986(9) 0.3757(3) 0.174(7) Uani 1 1 d GU . . 
H62 H 0.4608 0.4664 0.3771 0.209 Uiso 1 1 calc R . . 
C63 C 0.4438(10) 0.5900(8) 0.3469(3) 0.166(7) Uani 1 1 d GU . . 
H63 H 0.5097 0.6201 0.3285 0.200 Uiso 1 1 calc R . . 
P1 P 0.86306(15) 0.91905(15) 0.32240(7) 0.0387(4) Uani 1 1 d . . . 
P2 P 0.61588(14) 0.91523(14) 0.45805(6) 0.0349(4) Uani 1 1 d . . . 
P3 P 0.4123(4) 0.7497(2) 0.30578(8) 0.0888(11) Uani 1 1 d . . . 
O4 O 0.8618(4) 0.9626(4) 0.37016(19) 0.0480(12) Uani 1 1 d . . . 
O5 O 0.5075(4) 0.8697(4) 0.43448(17) 0.0410(11) Uani 1 1 d . . . 
O2 O 1.0080(5) 1.4669(5) 0.3672(2) 0.0699(18) Uani 1 1 d . . . 
O3 O 0.4152(5) 1.2454(5) 0.3815(2) 0.0612(16) Uani 1 1 d . . . 
O1 O 0.6680(4) 1.1697(6) 0.1590(2) 0.0612(16) Uani 1 1 d . . . 
O6 O 0.5059(13) 0.7677(9) 0.2760(3) 0.156(6) Uani 1 1 d . . . 
N3 N 0.5451(4) 1.1323(4) 0.21789(18) 0.0310(11) Uani 1 1 d . . . 
N1 N 0.9647(5) 1.3415(4) 0.3089(2) 0.0368(12) Uani 1 1 d . . . 
N2 N 0.5741(5) 1.2632(4) 0.4117(2) 0.0365(12) Uani 1 1 d . . . 
N6 N 0.4311(6) 0.8527(5) 0.3408(2) 0.0438(14) Uani 1 1 d . . . 
H6N H 0.4244 0.8398 0.3713 0.053 Uiso 1 1 calc R . . 
N5 N 0.7274(5) 1.0165(5) 0.4310(2) 0.0387(13) Uani 1 1 d . . . 
H5N H 0.7831 1.0055 0.4246 0.046 Uiso 1 1 calc R . . 
N4 N 0.7953(7) 0.9443(6) 0.2813(3) 0.069(2) Uani 1 1 d . . . 
H4N H 0.7491 0.8877 0.2637 0.082 Uiso 1 1 calc R . . 
C6 C 0.8820(5) 1.2406(5) 0.2856(2) 0.0309(13) Uani 1 1 d . . . 
C7 C 0.8032(5) 1.2445(5) 0.2576(2) 0.0327(13) Uani 1 1 d . . . 
H7 H 0.8029 1.3122 0.2536 0.039 Uiso 1 1 calc R . . 
C1 C 0.6437(5) 1.1509(6) 0.2010(2) 0.0374(15) Uani 1 1 d . . . 
C2 C 0.7241(5) 1.1483(5) 0.2354(2) 0.0323(14) Uani 1 1 d . . . 
C5 C 0.8858(5) 1.1443(5) 0.2924(2) 0.0363(15) Uani 1 1 d . . . 
H5 H 0.9430 1.1444 0.3107 0.044 Uiso 1 1 calc R . . 
C4 C 0.8039(5) 1.0472(5) 0.2715(2) 0.0365(15) Uani 1 1 d . . . 
C3 C 0.7252(5) 1.0474(6) 0.2414(3) 0.0382(15) Uani 1 1 d . . . 
H3 H 0.6734 0.9818 0.2253 0.046 Uiso 1 1 calc R . . 
C9 C 1.1403(6) 1.3758(7) 0.2723(3) 0.053(2) Uani 1 1 d . . . 
H9A H 1.1636 1.3618 0.3030 0.080 Uiso 1 1 calc R . . 
H9B H 1.2054 1.4313 0.2550 0.080 Uiso 1 1 calc R . . 
H9C H 1.1034 1.3067 0.2542 0.080 Uiso 1 1 calc R . . 
C8 C 1.0615(6) 1.4180(6) 0.2799(3) 0.0444(17) Uani 1 1 d . . . 
H8A H 1.1012 1.4913 0.2956 0.053 Uiso 1 1 calc R . . 
H8B H 1.0351 1.4283 0.2488 0.053 Uiso 1 1 calc R . . 
C15 C 0.6641(5) 1.2434(5) 0.4080(2) 0.0304(13) Uani 1 1 d . . . 
C12 C 0.8339(6) 1.1941(6) 0.3942(2) 0.0368(14) Uani 1 1 d . . . 
H12 H 0.8921 1.1781 0.3895 0.044 Uiso 1 1 calc R . . 
C17 C 0.5785(7) 1.3370(6) 0.4497(3) 0.0462(17) Uani 1 1 d . . . 
H17A H 0.5269 1.3643 0.4420 0.055 Uiso 1 1 calc R . . 
H17B H 0.6543 1.4021 0.4511 0.055 Uiso 1 1 calc R . . 
C16 C 0.7607(6) 1.3176(5) 0.3853(2) 0.0385(15) Uani 1 1 d . . . 
H16 H 0.7695 1.3864 0.3747 0.046 Uiso 1 1 calc R . . 
C14 C 0.6553(6) 1.1449(5) 0.4251(2) 0.0339(14) Uani 1 1 d . . . 
H14 H 0.5907 1.0948 0.4422 0.041 Uiso 1 1 calc R . . 
C11 C 0.8449(6) 1.2946(5) 0.3774(2) 0.0354(14) Uani 1 1 d . . . 
C13 C 0.7369(6) 1.1180(6) 0.4179(2) 0.0366(14) Uani 1 1 d . . . 
C10 C 0.9448(6) 1.3762(6) 0.3510(3) 0.0465(18) Uani 1 1 d . . . 
C18 C 0.5497(9) 1.2846(8) 0.4967(3) 0.064(2) Uani 1 1 d . . . 
H18A H 0.4774 1.2163 0.4951 0.097 Uiso 1 1 calc R . . 
H18B H 0.5460 1.3358 0.5194 0.097 Uiso 1 1 calc R . . 
H18C H 0.6064 1.2669 0.5068 0.097 Uiso 1 1 calc R . . 
C22 C 0.4565(6) 0.9570(6) 0.3260(2) 0.0374(15) Uani 1 1 d . . . 
C25 C 0.5162(5) 1.1746(5) 0.2982(2) 0.0331(14) Uani 1 1 d . . . 
H25 H 0.5367 1.2478 0.2885 0.040 Uiso 1 1 calc R . . 
C24 C 0.5140(5) 1.0989(5) 0.2659(2) 0.0318(13) Uani 1 1 d . . . 
C20 C 0.4878(5) 1.1418(5) 0.3452(2) 0.0324(14) Uani 1 1 d . . . 
C21 C 0.4535(5) 1.0297(5) 0.3584(2) 0.0343(14) Uani 1 1 d . . . 
H21 H 0.4286 1.0051 0.3896 0.041 Uiso 1 1 calc R . . 
C19 C 0.4887(6) 1.2214(6) 0.3807(3) 0.0413(16) Uani 1 1 d . . . 
C26 C 0.4623(6) 1.1304(6) 0.1853(2) 0.0384(15) Uani 1 1 d . . . 
H26A H 0.5012 1.1783 0.1579 0.046 Uiso 1 1 calc R . . 
H26B H 0.4215 1.1622 0.2015 0.046 Uiso 1 1 calc R . . 
C23 C 0.4837(5) 0.9914(5) 0.2795(2) 0.0319(13) Uani 1 1 d . . . 
H23 H 0.4815 0.9406 0.2565 0.038 Uiso 1 1 calc R . . 
C27 C 0.3812(7) 1.0177(8) 0.1680(3) 0.056(2) Uani 1 1 d . . . 
H27A H 0.4191 0.9903 0.1476 0.084 Uiso 1 1 calc R . . 
H27B H 0.3226 1.0210 0.1501 0.084 Uiso 1 1 calc R . . 
H27C H 0.3482 0.9675 0.1949 0.084 Uiso 1 1 calc R . . 
C28 C 1.0011(7) 0.9694(7) 0.3021(3) 0.056(2) Uani 1 1 d U . . 
C29 C 1.0256(11) 0.9779(8) 0.2546(4) 0.081(3) Uani 1 1 d U . . 
H29 H 0.9725 0.9694 0.2315 0.098 Uiso 1 1 calc R . . 
C30 C 1.1355(15) 1.0003(10) 0.2415(7) 0.126(5) Uani 1 1 d U . . 
H30 H 1.1552 1.0044 0.2091 0.151 Uiso 1 1 calc R . . 
C31 C 1.2154(14) 1.0163(14) 0.2780(10) 0.159(8) Uani 1 1 d U . . 
H31 H 1.2885 1.0331 0.2699 0.190 Uiso 1 1 calc R . . 
C37 C 0.7251(9) 0.5435(8) 0.3217(4) 0.075(3) Uani 1 1 d . . . 
H37 H 0.6965 0.4655 0.3226 0.090 Uiso 1 1 calc R . . 
C34 C 0.8016(6) 0.7711(6) 0.3199(3) 0.0465(18) Uani 1 1 d . . . 
C36 C 0.772(2) 0.6047(11) 0.2804(5) 0.151(9) Uani 1 1 d . . . 
H36 H 0.7802 0.5696 0.2531 0.182 Uiso 1 1 calc R . . 
C39 C 0.7618(14) 0.7115(9) 0.3587(5) 0.116(6) Uani 1 1 d . . . 
H39 H 0.7598 0.7461 0.3873 0.139 Uiso 1 1 calc R . . 
C38 C 0.7220(19) 0.5953(9) 0.3575(5) 0.149(8) Uani 1 1 d . . . 
H38 H 0.6911 0.5542 0.3857 0.178 Uiso 1 1 calc R . . 
C35 C 0.8075(18) 0.7183(10) 0.2799(4) 0.137(7) Uani 1 1 d . . . 
H35 H 0.8359 0.7593 0.2516 0.164 Uiso 1 1 calc R . . 
C40 C 0.6094(6) 0.9704(5) 0.5146(2) 0.0382(15) Uani 1 1 d . . . 
C41 C 0.7033(6) 1.0209(6) 0.5452(3) 0.0471(18) Uani 1 1 d . . . 
H41 H 0.7726 1.0305 0.5350 0.057 Uiso 1 1 calc R . . 
C42 C 0.6940(9) 1.0548(6) 0.5882(3) 0.065(3) Uani 1 1 d . . . 
H42 H 0.7569 1.0866 0.6085 0.078 Uiso 1 1 calc R . . 
C45 C 0.5130(7) 0.9590(9) 0.5302(3) 0.064(2) Uani 1 1 d . . . 
H45 H 0.4493 0.9253 0.5105 0.076 Uiso 1 1 calc R . . 
C44 C 0.5053(9) 0.9957(14) 0.5745(4) 0.121(6) Uani 1 1 d . . . 
H44 H 0.4368 0.9873 0.5852 0.145 Uiso 1 1 calc R . . 
C43 C 0.5986(9) 1.0450(9) 0.6035(3) 0.076(3) Uani 1 1 d . . . 
H43 H 0.5945 1.0715 0.6339 0.091 Uiso 1 1 calc R . . 
C47 C 0.7650(9) 0.8432(9) 0.4805(3) 0.064(2) Uani 1 1 d . . . 
H47 H 0.8213 0.9187 0.4838 0.077 Uiso 1 1 calc R . . 
C46 C 0.6554(8) 0.8117(7) 0.4674(3) 0.055(2) Uani 1 1 d . . . 
C51 C 0.5768(10) 0.7034(7) 0.4622(4) 0.074(3) Uani 1 1 d . . . 
H51 H 0.5047 0.6840 0.4514 0.089 Uiso 1 1 calc R . . 
C49 C 0.6987(13) 0.6405(10) 0.4830(3) 0.083(4) Uani 1 1 d . . . 
H49 H 0.7132 0.5812 0.4868 0.099 Uiso 1 1 calc R . . 
C48 C 0.7857(10) 0.7532(11) 0.4887(3) 0.074(3) Uani 1 1 d . . . 
H48 H 0.8576 0.7685 0.4979 0.089 Uiso 1 1 calc R . . 
C50 C 0.6020(11) 0.6212(9) 0.4726(5) 0.085(4) Uani 1 1 d . . . 
H50 H 0.5435 0.5462 0.4720 0.102 Uiso 1 1 calc R . . 
C52 C 0.304(2) 0.7252(9) 0.2713(4) 0.117(6) Uani 1 1 d U . . 
C57 C 0.2214(16) 0.7396(8) 0.2856(6) 0.120(6) Uani 1 1 d U . . 
H57 H 0.2250 0.7626 0.3174 0.143 Uiso 1 1 calc R . . 
C53 C 0.290(2) 0.6892(9) 0.2253(4) 0.169(9) Uani 1 1 d U . . 
H53 H 0.3443 0.6751 0.2117 0.202 Uiso 1 1 calc R . . 
C55 C 0.117(3) 0.6933(16) 0.2179(8) 0.179(11) Uani 1 1 d U . . 
H55 H 0.0550 0.6833 0.2002 0.215 Uiso 1 1 calc R . . 
C56 C 0.1306(19) 0.7255(11) 0.2599(7) 0.177(10) Uani 1 1 d U . . 
H56 H 0.0777 0.7403 0.2743 0.212 Uiso 1 1 calc R . . 
C54 C 0.198(3) 0.6724(15) 0.1974(6) 0.199(13) Uani 1 1 d U . . 
H54 H 0.1905 0.6476 0.1657 0.238 Uiso 1 1 calc R . . 
C33 C 1.0784(10) 0.9857(17) 0.3356(6) 0.130(6) Uani 1 1 d U . . 
H33 H 1.0617 0.9827 0.3683 0.156 Uiso 1 1 calc R . . 
C32 C 1.1867(11) 1.0076(18) 0.3199(10) 0.164(8) Uani 1 1 d U . . 
H32 H 1.2392 1.0159 0.3433 0.196 Uiso 1 1 calc R . . 
O8 O 0.1891(9) 0.7788(6) 0.4245(3) 0.119(4) Uani 1 1 d . . . 
O7A O 0.6503(9) 0.7761(8) 0.2175(4) 0.066(3) Uani 0.55 1 d P . . 
O9 O 0.2472(12) 0.1782(16) 0.4491(6) 0.183(6) Uani 1 1 d . . . 
O7B O 0.7438(8) 0.8600(8) 0.1559(3) 0.034(2) Uiso 0.45 1 d P . . 
 
loop_ 
 _atom_site_aniso_label 
 _atom_site_aniso_U_11 
 _atom_site_aniso_U_22 
 _atom_site_aniso_U_33 
 _atom_site_aniso_U_23 
 _atom_site_aniso_U_13 
 _atom_site_aniso_U_12 
C58 0.257(15) 0.047(5) 0.035(4) 0.006(4) 0.007(7) 0.088(8) 
C59 0.110(9) 0.080(8) 0.113(9) 0.044(7) -0.048(8) 0.029(7) 
C60 0.161(13) 0.084(9) 0.128(11) 0.072(8) -0.078(10) -0.027(8) 
C61 0.29(2) 0.047(6) 0.072(8) 0.002(5) -0.038(11) 0.059(9) 
C62 0.39(2) 0.146(11) 0.087(9) 0.052(8) 0.075(12) 0.210(14) 
C63 0.37(2) 0.160(11) 0.082(8) 0.061(8) 0.105(11) 0.215(13) 
P1 0.0363(9) 0.0390(10) 0.0441(10) 0.0073(8) 0.0003(8) 0.0212(8) 
P2 0.0395(9) 0.0305(9) 0.0408(9) 0.0090(7) 0.0076(7) 0.0222(8) 
P3 0.205(4) 0.0529(14) 0.0328(10) 0.0083(10) 0.0189(16) 0.0822(19) 
O4 0.047(3) 0.045(3) 0.061(3) 0.007(2) 0.014(2) 0.030(2) 
O5 0.045(3) 0.041(3) 0.042(3) 0.001(2) 0.001(2) 0.025(2) 
O2 0.070(4) 0.046(3) 0.053(3) -0.007(3) 0.014(3) -0.002(3) 
O3 0.073(4) 0.077(4) 0.068(4) -0.028(3) -0.021(3) 0.064(3) 
O1 0.043(3) 0.100(5) 0.046(3) 0.027(3) 0.010(2) 0.041(3) 
O6 0.347(17) 0.159(9) 0.074(5) 0.059(6) 0.110(8) 0.211(11) 
N3 0.028(3) 0.034(3) 0.034(3) 0.011(2) 0.002(2) 0.017(2) 
N1 0.037(3) 0.028(3) 0.039(3) 0.002(2) -0.001(2) 0.012(2) 
N2 0.044(3) 0.030(3) 0.043(3) 0.002(2) -0.003(3) 0.024(2) 
N6 0.068(4) 0.039(3) 0.030(3) 0.001(2) 0.009(3) 0.031(3) 
N5 0.039(3) 0.039(3) 0.050(3) 0.019(3) 0.017(3) 0.028(3) 
N4 0.080(5) 0.035(3) 0.087(6) 0.003(3) -0.038(4) 0.026(4) 
C6 0.023(3) 0.033(3) 0.030(3) 0.004(3) 0.000(2) 0.009(3) 
C7 0.032(3) 0.036(3) 0.030(3) 0.010(3) 0.004(3) 0.017(3) 
C1 0.030(3) 0.040(4) 0.034(4) 0.011(3) -0.004(3) 0.012(3) 
C2 0.029(3) 0.031(3) 0.038(3) 0.009(3) -0.001(3) 0.016(3) 
C5 0.029(3) 0.037(3) 0.039(4) 0.009(3) 0.004(3) 0.013(3) 
C4 0.034(3) 0.030(3) 0.043(4) 0.009(3) -0.008(3) 0.014(3) 
C3 0.032(3) 0.034(3) 0.044(4) 0.006(3) -0.004(3) 0.013(3) 
C9 0.038(4) 0.056(5) 0.053(5) -0.011(4) 0.009(3) 0.012(4) 
C8 0.030(3) 0.041(4) 0.042(4) 0.001(3) 0.004(3) 0.003(3) 
C15 0.029(3) 0.034(3) 0.026(3) 0.000(2) -0.002(2) 0.015(3) 
C12 0.040(4) 0.034(3) 0.036(3) 0.002(3) 0.002(3) 0.018(3) 
C17 0.060(5) 0.033(4) 0.044(4) -0.009(3) 0.004(3) 0.022(3) 
C16 0.050(4) 0.024(3) 0.038(4) 0.004(3) -0.013(3) 0.016(3) 
C14 0.038(3) 0.034(3) 0.036(3) 0.003(3) 0.000(3) 0.023(3) 
C11 0.038(3) 0.033(3) 0.030(3) 0.004(3) -0.002(3) 0.013(3) 
C13 0.041(4) 0.041(4) 0.032(3) 0.007(3) 0.002(3) 0.025(3) 
C10 0.050(4) 0.032(4) 0.045(4) 0.009(3) 0.012(3) 0.011(3) 
C18 0.078(6) 0.055(5) 0.052(5) -0.016(4) 0.000(4) 0.026(5) 
C22 0.041(4) 0.039(4) 0.039(4) 0.006(3) 0.001(3) 0.025(3) 
C25 0.029(3) 0.025(3) 0.046(4) 0.000(3) -0.005(3) 0.013(3) 
C24 0.021(3) 0.039(3) 0.037(3) 0.002(3) -0.004(2) 0.017(3) 
C20 0.035(3) 0.037(3) 0.036(3) -0.007(3) -0.012(3) 0.027(3) 
C21 0.039(4) 0.036(3) 0.035(3) 0.001(3) 0.002(3) 0.024(3) 
C19 0.048(4) 0.037(4) 0.046(4) -0.004(3) -0.006(3) 0.025(3) 
C26 0.042(4) 0.049(4) 0.036(3) 0.008(3) -0.007(3) 0.032(3) 
C23 0.035(3) 0.041(3) 0.026(3) 0.000(3) -0.002(3) 0.024(3) 
C27 0.052(5) 0.074(6) 0.043(4) -0.007(4) -0.008(4) 0.032(4) 
C28 0.048(4) 0.042(4) 0.061(5) -0.006(4) 0.019(3) 0.009(4) 
C29 0.116(7) 0.056(5) 0.077(5) 0.013(5) 0.047(5) 0.047(6) 
C30 0.144(10) 0.055(6) 0.171(12) 0.031(8) 0.125(9) 0.044(8) 
C31 0.068(8) 0.093(10) 0.284(19) -0.053(14) 0.073(8) 0.018(8) 
C37 0.091(7) 0.053(5) 0.086(7) 0.012(5) -0.026(6) 0.040(5) 
C34 0.046(4) 0.042(4) 0.055(4) 0.009(3) -0.006(3) 0.025(3) 
C36 0.30(3) 0.060(7) 0.074(8) -0.029(6) -0.031(11) 0.080(12) 
C39 0.204(16) 0.062(6) 0.108(9) 0.038(6) 0.096(10) 0.086(9) 
C38 0.30(2) 0.042(6) 0.073(8) 0.019(6) 0.068(11) 0.061(10) 
C35 0.27(2) 0.054(6) 0.050(6) 0.005(5) -0.009(9) 0.055(10) 
C40 0.040(4) 0.032(3) 0.042(4) 0.009(3) 0.006(3) 0.017(3) 
C41 0.046(4) 0.040(4) 0.060(5) -0.002(3) -0.007(3) 0.026(3) 
C42 0.085(7) 0.032(4) 0.053(5) -0.001(3) -0.010(5) 0.010(4) 
C45 0.041(4) 0.091(7) 0.044(4) -0.009(4) 0.010(4) 0.022(4) 
C44 0.054(6) 0.165(13) 0.073(7) -0.041(8) 0.035(6) 0.001(7) 
C43 0.068(6) 0.070(6) 0.048(5) -0.005(4) 0.013(5) 0.003(5) 
C47 0.082(6) 0.075(6) 0.063(5) 0.016(4) 0.003(5) 0.059(5) 
C46 0.083(6) 0.069(6) 0.041(4) 0.027(4) 0.028(4) 0.058(5) 
C51 0.103(8) 0.043(5) 0.096(7) 0.026(5) 0.048(6) 0.050(5) 
C49 0.160(12) 0.088(8) 0.054(5) 0.026(5) 0.037(6) 0.103(9) 
C48 0.102(8) 0.113(9) 0.057(5) 0.022(5) 0.008(5) 0.090(8) 
C50 0.107(9) 0.065(6) 0.115(9) 0.041(6) 0.057(7) 0.066(7) 
C52 0.250(18) 0.044(6) 0.056(6) -0.009(4) -0.041(9) 0.072(9) 
C57 0.162(13) 0.028(5) 0.108(10) 0.011(6) -0.083(10) 0.002(7) 
C53 0.31(2) 0.033(5) 0.050(6) 0.001(4) -0.035(10) -0.004(8) 
C55 0.26(2) 0.072(10) 0.093(13) 0.003(9) -0.083(14) -0.004(13) 
C56 0.214(16) 0.066(8) 0.165(14) 0.008(8) -0.151(13) 0.006(9) 
C54 0.31(3) 0.064(9) 0.064(10) -0.009(7) -0.086(14) -0.020(14) 
C33 0.061(7) 0.219(18) 0.110(8) -0.055(11) -0.019(6) 0.070(10) 
C32 0.037(6) 0.184(18) 0.233(16) -0.059(16) 0.004(8) 0.028(8) 
O8 0.181(10) 0.065(5) 0.113(6) 0.047(4) 0.092(7) 0.064(6) 
O7A 0.059(6) 0.033(5) 0.093(8) -0.015(5) -0.010(6) 0.012(5) 
O9 0.117(9) 0.221(16) 0.222(16) 0.044(13) 0.022(10) 0.092(10) 
 
_geom_special_details 
; 
 All esds (except the esd in the dihedral angle between two l.s. planes) 
 are estimated using the full covariance matrix.  The cell esds are taken 
 into account individually in the estimation of esds in distances, angles 
 and torsion angles; correlations between esds in cell parameters are only 
 used when they are defined by crystal symmetry.  An approximate (isotropic) 
 treatment of cell esds is used for estimating esds involving l.s. planes. 
; 
 
loop_ 
 _geom_bond_atom_site_label_1 
 _geom_bond_atom_site_label_2 
 _geom_bond_distance 
 _geom_bond_site_symmetry_2 
 _geom_bond_publ_flag 
C58 C59 1.3900 . ? 
C58 C63 1.3900 . ? 
C58 P3 1.772(5) . ? 
C59 C60 1.3900 . ? 
C59 H59 0.9500 . ? 
C60 C61 1.3900 . ? 
C60 H60 0.9500 . ? 
C61 C62 1.3900 . ? 
C61 H61 0.9500 . ? 
C62 C63 1.3900 . ? 
C62 H62 0.9500 . ? 
C63 H63 0.9500 . ? 
P1 O4 1.487(6) . ? 
P1 N4 1.643(7) . ? 
P1 C28 1.779(8) . ? 
P1 C34 1.793(8) . ? 
P2 O5 1.472(5) . ? 
P2 N5 1.672(6) . ? 
P2 C40 1.798(7) . ? 
P2 C46 1.800(7) . ? 
P3 O6 1.464(11) . ? 
P3 N6 1.652(6) . ? 
P3 C52 1.69(2) . ? 
O2 C10 1.212(9) . ? 
O3 C19 1.225(9) . ? 
O1 C1 1.228(8) . ? 
N3 C1 1.349(9) . ? 
N3 C24 1.434(8) . ? 
N3 C26 1.467(8) . ? 
N1 C10 1.364(10) . ? 
N1 C6 1.454(8) . ? 
N1 C8 1.481(9) . ? 
N2 C19 1.354(9) . ? 
N2 C15 1.414(9) . ? 
N2 C17 1.469(9) . ? 
N6 C22 1.376(9) . ? 
N6 H6N 0.8800 . ? 
N5 C13 1.400(9) . ? 
N5 H5N 0.8800 . ? 
N4 C4 1.404(9) . ? 
N4 H4N 0.8800 . ? 
C6 C7 1.377(9) . ? 
C6 C5 1.380(9) . ? 
C7 C2 1.389(9) . ? 
C7 H7 0.9500 . ? 
C1 C2 1.498(9) . ? 
C2 C3 1.422(9) . ? 
C5 C4 1.391(10) . ? 
C5 H5 0.9500 . ? 
C4 C3 1.389(9) . ? 
C3 H3 0.9500 . ? 
C9 C8 1.495(12) . ? 
C9 H9A 0.9800 . ? 
C9 H9B 0.9800 . ? 
C9 H9C 0.9800 . ? 
C8 H8A 0.9900 . ? 
C8 H8B 0.9900 . ? 
C15 C16 1.378(9) . ? 
C15 C14 1.400(9) . ? 
C12 C13 1.401(10) . ? 
C12 C11 1.411(9) . ? 
C12 H12 0.9500 . ? 
C17 C18 1.473(12) . ? 
C17 H17A 0.9900 . ? 
C17 H17B 0.9900 . ? 
C16 C11 1.379(10) . ? 
C16 H16 0.9500 . ? 
C14 C13 1.378(9) . ? 
C14 H14 0.9500 . ? 
C11 C10 1.484(10) . ? 
C18 H18A 0.9800 . ? 
C18 H18B 0.9800 . ? 
C18 H18C 0.9800 . ? 
C22 C21 1.379(9) . ? 
C22 C23 1.390(9) . ? 
C25 C24 1.384(9) . ? 
C25 C20 1.401(9) . ? 
C25 H25 0.9500 . ? 
C24 C23 1.389(9) . ? 
C20 C21 1.434(9) . ? 
C20 C19 1.491(9) . ? 
C21 H21 0.9500 . ? 
C26 C27 1.485(12) . ? 
C26 H26A 0.9900 . ? 
C26 H26B 0.9900 . ? 
C23 H23 0.9500 . ? 
C27 H27A 0.9800 . ? 
C27 H27B 0.9800 . ? 
C27 H27C 0.9800 . ? 
C28 C33 1.367(17) . ? 
C28 C29 1.377(13) . ? 
C29 C30 1.449(19) . ? 
C29 H29 0.9500 . ? 
C30 C31 1.45(3) . ? 
C30 H30 0.9500 . ? 
C31 C32 1.24(3) . ? 
C31 H31 0.9500 . ? 
C37 C38 1.259(16) . ? 
C37 C36 1.402(19) . ? 
C37 H37 0.9500 . ? 
C34 C39 1.320(13) . ? 
C34 C35 1.376(15) . ? 
C36 C35 1.401(17) . ? 
C36 H36 0.9500 . ? 
C39 C38 1.423(15) . ? 
C39 H39 0.9500 . ? 
C38 H38 0.9500 . ? 
C35 H35 0.9500 . ? 
C40 C45 1.345(11) . ? 
C40 C41 1.427(10) . ? 
C41 C42 1.336(12) . ? 
C41 H41 0.9500 . ? 
C42 C43 1.337(15) . ? 
C42 H42 0.9500 . ? 
C45 C44 1.379(14) . ? 
C45 H45 0.9500 . ? 
C44 C43 1.394(17) . ? 
C44 H44 0.9500 . ? 
C43 H43 0.9500 . ? 
C47 C46 1.410(14) . ? 
C47 C48 1.437(13) . ? 
C47 H47 0.9500 . ? 
C46 C51 1.357(14) . ? 
C51 C50 1.385(13) . ? 
C51 H51 0.9500 . ? 
C49 C50 1.268(18) . ? 
C49 C48 1.432(18) . ? 
C49 H49 0.9500 . ? 
C48 H48 0.9500 . ? 
C50 H50 0.9500 . ? 
C52 C57 1.32(3) . ? 
C52 C53 1.375(17) . ? 
C57 C56 1.38(2) . ? 
C57 H57 0.9500 . ? 
C53 C54 1.43(4) . ? 
C53 H53 0.9500 . ? 
C55 C56 1.25(3) . ? 
C55 C54 1.41(4) . ? 
C55 H55 0.9500 . ? 
C56 H56 0.9500 . ? 
C54 H54 0.9500 . ? 
C33 C32 1.450(19) . ? 
C33 H33 0.9500 . ? 
C32 H32 0.9500 . ? 
 
loop_ 
 _geom_angle_atom_site_label_1 
 _geom_angle_atom_site_label_2 
 _geom_angle_atom_site_label_3 
 _geom_angle 
 _geom_angle_site_symmetry_1 
 _geom_angle_site_symmetry_3 
 _geom_angle_publ_flag 
C59 C58 C63 120.0 . . ? 
C59 C58 P3 121.0(5) . . ? 
C63 C58 P3 119.0(5) . . ? 
C60 C59 C58 120.0 . . ? 
C60 C59 H59 120.0 . . ? 
C58 C59 H59 120.0 . . ? 
C59 C60 C61 120.0 . . ? 
C59 C60 H60 120.0 . . ? 
C61 C60 H60 120.0 . . ? 
C62 C61 C60 120.0 . . ? 
C62 C61 H61 120.0 . . ? 
C60 C61 H61 120.0 . . ? 
C61 C62 C63 120.0 . . ? 
C61 C62 H62 120.0 . . ? 
C63 C62 H62 120.0 . . ? 
C62 C63 C58 120.0 . . ? 
C62 C63 H63 120.0 . . ? 
C58 C63 H63 120.0 . . ? 
O4 P1 N4 115.7(4) . . ? 
O4 P1 C28 111.4(4) . . ? 
N4 P1 C28 108.0(5) . . ? 
O4 P1 C34 114.1(3) . . ? 
N4 P1 C34 102.8(4) . . ? 
C28 P1 C34 103.9(4) . . ? 
O5 P2 N5 118.3(3) . . ? 
O5 P2 C40 109.2(3) . . ? 
N5 P2 C40 105.8(3) . . ? 
O5 P2 C46 112.3(4) . . ? 
N5 P2 C46 102.5(3) . . ? 
C40 P2 C46 108.1(3) . . ? 
O6 P3 N6 117.1(6) . . ? 
O6 P3 C52 109.4(8) . . ? 
N6 P3 C52 105.1(5) . . ? 
O6 P3 C58 110.2(4) . . ? 
N6 P3 C58 104.1(3) . . ? 
C52 P3 C58 110.7(6) . . ? 
C1 N3 C24 120.9(5) . . ? 
C1 N3 C26 119.5(5) . . ? 
C24 N3 C26 119.0(5) . . ? 
C10 N1 C6 122.4(5) . . ? 
C10 N1 C8 120.3(6) . . ? 
C6 N1 C8 115.9(5) . . ? 
C19 N2 C15 122.8(6) . . ? 
C19 N2 C17 119.8(6) . . ? 
C15 N2 C17 117.3(6) . . ? 
C22 N6 P3 125.4(5) . . ? 
C22 N6 H6N 117.3 . . ? 
P3 N6 H6N 117.3 . . ? 
C13 N5 P2 123.5(4) . . ? 
C13 N5 H5N 118.3 . . ? 
P2 N5 H5N 118.3 . . ? 
C4 N4 P1 126.3(6) . . ? 
C4 N4 H4N 116.8 . . ? 
P1 N4 H4N 116.8 . . ? 
C7 C6 C5 122.4(6) . . ? 
C7 C6 N1 119.0(6) . . ? 
C5 C6 N1 118.6(5) . . ? 
C6 C7 C2 119.1(6) . . ? 
C6 C7 H7 120.4 . . ? 
C2 C7 H7 120.4 . . ? 
O1 C1 N3 122.1(6) . . ? 
O1 C1 C2 120.4(6) . . ? 
N3 C1 C2 117.6(6) . . ? 
C7 C2 C3 120.2(6) . . ? 
C7 C2 C1 120.9(6) . . ? 
C3 C2 C1 118.7(6) . . ? 
C6 C5 C4 118.3(6) . . ? 
C6 C5 H5 120.9 . . ? 
C4 C5 H5 120.9 . . ? 
C3 C4 C5 121.5(6) . . ? 
C3 C4 N4 117.3(6) . . ? 
C5 C4 N4 121.2(6) . . ? 
C4 C3 C2 118.3(6) . . ? 
C4 C3 H3 120.9 . . ? 
C2 C3 H3 120.9 . . ? 
C8 C9 H9A 109.5 . . ? 
C8 C9 H9B 109.5 . . ? 
H9A C9 H9B 109.5 . . ? 
C8 C9 H9C 109.5 . . ? 
H9A C9 H9C 109.5 . . ? 
H9B C9 H9C 109.5 . . ? 
N1 C8 C9 112.3(6) . . ? 
N1 C8 H8A 109.2 . . ? 
C9 C8 H8A 109.2 . . ? 
N1 C8 H8B 109.2 . . ? 
C9 C8 H8B 109.2 . . ? 
H8A C8 H8B 107.9 . . ? 
C16 C15 C14 118.1(6) . . ? 
C16 C15 N2 121.0(6) . . ? 
C14 C15 N2 120.8(6) . . ? 
C13 C12 C11 119.9(6) . . ? 
C13 C12 H12 120.1 . . ? 
C11 C12 H12 120.1 . . ? 
N2 C17 C18 114.3(6) . . ? 
N2 C17 H17A 108.7 . . ? 
C18 C17 H17A 108.7 . . ? 
N2 C17 H17B 108.7 . . ? 
C18 C17 H17B 108.7 . . ? 
H17A C17 H17B 107.6 . . ? 
C15 C16 C11 121.7(6) . . ? 
C15 C16 H16 119.2 . . ? 
C11 C16 H16 119.2 . . ? 
C13 C14 C15 122.3(6) . . ? 
C13 C14 H14 118.8 . . ? 
C15 C14 H14 118.8 . . ? 
C16 C11 C12 119.4(6) . . ? 
C16 C11 C10 118.9(6) . . ? 
C12 C11 C10 121.7(6) . . ? 
C14 C13 N5 124.0(6) . . ? 
C14 C13 C12 118.6(6) . . ? 
N5 C13 C12 117.3(6) . . ? 
O2 C10 N1 122.0(6) . . ? 
O2 C10 C11 121.3(7) . . ? 
N1 C10 C11 116.6(6) . . ? 
C17 C18 H18A 109.5 . . ? 
C17 C18 H18B 109.5 . . ? 
H18A C18 H18B 109.5 . . ? 
C17 C18 H18C 109.5 . . ? 
H18A C18 H18C 109.5 . . ? 
H18B C18 H18C 109.5 . . ? 
N6 C22 C21 119.1(6) . . ? 
N6 C22 C23 122.2(6) . . ? 
C21 C22 C23 118.7(6) . . ? 
C24 C25 C20 119.0(6) . . ? 
C24 C25 H25 120.5 . . ? 
C20 C25 H25 120.5 . . ? 
C25 C24 C23 121.1(6) . . ? 
C25 C24 N3 119.5(6) . . ? 
C23 C24 N3 119.4(6) . . ? 
C25 C20 C21 119.2(6) . . ? 
C25 C20 C19 120.2(6) . . ? 
C21 C20 C19 120.6(6) . . ? 
C22 C21 C20 120.6(6) . . ? 
C22 C21 H21 119.7 . . ? 
C20 C21 H21 119.7 . . ? 
O3 C19 N2 123.0(6) . . ? 
O3 C19 C20 121.2(6) . . ? 
N2 C19 C20 115.8(6) . . ? 
N3 C26 C27 113.8(6) . . ? 
N3 C26 H26A 108.8 . . ? 
C27 C26 H26A 108.8 . . ? 
N3 C26 H26B 108.8 . . ? 
C27 C26 H26B 108.8 . . ? 
H26A C26 H26B 107.7 . . ? 
C24 C23 C22 121.1(6) . . ? 
C24 C23 H23 119.4 . . ? 
C22 C23 H23 119.4 . . ? 
C26 C27 H27A 109.5 . . ? 
C26 C27 H27B 109.5 . . ? 
H27A C27 H27B 109.5 . . ? 
C26 C27 H27C 109.5 . . ? 
H27A C27 H27C 109.5 . . ? 
H27B C27 H27C 109.5 . . ? 
C33 C28 C29 121.6(10) . . ? 
C33 C28 P1 116.4(8) . . ? 
C29 C28 P1 121.5(8) . . ? 
C28 C29 C30 117.3(14) . . ? 
C28 C29 H29 121.3 . . ? 
C30 C29 H29 121.3 . . ? 
C29 C30 C31 119.6(14) . . ? 
C29 C30 H30 120.2 . . ? 
C31 C30 H30 120.2 . . ? 
C32 C31 C30 118.8(15) . . ? 
C32 C31 H31 120.6 . . ? 
C30 C31 H31 120.6 . . ? 
C38 C37 C36 117.7(10) . . ? 
C38 C37 H37 121.2 . . ? 
C36 C37 H37 121.2 . . ? 
C39 C34 C35 117.9(8) . . ? 
C39 C34 P1 119.9(8) . . ? 
C35 C34 P1 121.6(7) . . ? 
C35 C36 C37 119.2(12) . . ? 
C35 C36 H36 120.4 . . ? 
C37 C36 H36 120.4 . . ? 
C34 C39 C38 119.8(11) . . ? 
C34 C39 H39 120.1 . . ? 
C38 C39 H39 120.1 . . ? 
C37 C38 C39 124.3(11) . . ? 
C37 C38 H38 117.8 . . ? 
C39 C38 H38 117.8 . . ? 
C34 C35 C36 120.9(11) . . ? 
C34 C35 H35 119.5 . . ? 
C36 C35 H35 119.5 . . ? 
C45 C40 C41 118.1(7) . . ? 
C45 C40 P2 120.2(6) . . ? 
C41 C40 P2 121.6(5) . . ? 
C42 C41 C40 120.2(8) . . ? 
C42 C41 H41 119.9 . . ? 
C40 C41 H41 119.9 . . ? 
C41 C42 C43 121.7(9) . . ? 
C41 C42 H42 119.1 . . ? 
C43 C42 H42 119.1 . . ? 
C40 C45 C44 120.9(9) . . ? 
C40 C45 H45 119.6 . . ? 
C44 C45 H45 119.6 . . ? 
C45 C44 C43 119.6(10) . . ? 
C45 C44 H44 120.2 . . ? 
C43 C44 H44 120.2 . . ? 
C42 C43 C44 119.5(9) . . ? 
C42 C43 H43 120.3 . . ? 
C44 C43 H43 120.3 . . ? 
C46 C47 C48 115.4(10) . . ? 
C46 C47 H47 122.3 . . ? 
C48 C47 H47 122.3 . . ? 
C51 C46 C47 121.3(8) . . ? 
C51 C46 P2 118.2(8) . . ? 
C47 C46 P2 120.4(7) . . ? 
C46 C51 C50 119.8(12) . . ? 
C46 C51 H51 120.1 . . ? 
C50 C51 H51 120.1 . . ? 
C50 C49 C48 119.0(9) . . ? 
C50 C49 H49 120.5 . . ? 
C48 C49 H49 120.5 . . ? 
C49 C48 C47 120.5(10) . . ? 
C49 C48 H48 119.7 . . ? 
C47 C48 H48 119.7 . . ? 
C49 C50 C51 123.6(12) . . ? 
C49 C50 H50 118.2 . . ? 
C51 C50 H50 118.2 . . ? 
C57 C52 C53 112(2) . . ? 
C57 C52 P3 123.4(10) . . ? 
C53 C52 P3 125(2) . . ? 
C52 C57 C56 128(2) . . ? 
C52 C57 H57 116.0 . . ? 
C56 C57 H57 116.0 . . ? 
C52 C53 C54 122(3) . . ? 
C52 C53 H53 118.9 . . ? 
C54 C53 H53 118.9 . . ? 
C56 C55 C54 118(3) . . ? 
C56 C55 H55 120.9 . . ? 
C54 C55 H55 120.9 . . ? 
C55 C56 C57 121(3) . . ? 
C55 C56 H56 119.6 . . ? 
C57 C56 H56 119.6 . . ? 
C55 C54 C53 118.7(18) . . ? 
C55 C54 H54 120.7 . . ? 
C53 C54 H54 120.7 . . ? 
C28 C33 C32 118.0(16) . . ? 
C28 C33 H33 121.0 . . ? 
C32 C33 H33 121.0 . . ? 
C31 C32 C33 125(2) . . ? 
C31 C32 H32 117.7 . . ? 
C33 C32 H32 117.8 . . ? 
 
_diffrn_measured_fraction_theta_max    0.941 
_diffrn_reflns_theta_full              25.50 
_diffrn_measured_fraction_theta_full   0.996 
_refine_diff_density_max    1.858 
_refine_diff_density_min   -0.628 
_refine_diff_density_rms    0.163 

#==END


data_compound1f 
 
_audit_creation_method            SHELXL-97 
_chemical_name_systematic 
; 
 ? 
; 
_chemical_name_common             ? 
_chemical_melting_point           ? 
_chemical_formula_moiety          ? 
_chemical_formula_sum 
 'C65 H63 N6 O7 P3 S' 
_chemical_formula_weight          1165.18 
 
loop_ 
 _atom_type_symbol 
 _atom_type_description 
 _atom_type_scat_dispersion_real 
 _atom_type_scat_dispersion_imag 
 _atom_type_scat_source 
 'C'  'C'   0.0033   0.0016 
 'International Tables Vol C Tables 4.2.6.8 and 6.1.1.4' 
 'H'  'H'   0.0000   0.0000 
 'International Tables Vol C Tables 4.2.6.8 and 6.1.1.4' 
 'N'  'N'   0.0061   0.0033 
 'International Tables Vol C Tables 4.2.6.8 and 6.1.1.4' 
 'O'  'O'   0.0106   0.0060 
 'International Tables Vol C Tables 4.2.6.8 and 6.1.1.4' 
 'P'  'P'   0.1023   0.0942 
 'International Tables Vol C Tables 4.2.6.8 and 6.1.1.4' 
 'S'  'S'   0.1246   0.1234 
 'International Tables Vol C Tables 4.2.6.8 and 6.1.1.4' 
 
_symmetry_cell_setting           'Triclinic'
_symmetry_space_group_name_H-M   'P-1   '
loop_ 
 _symmetry_equiv_pos_as_xyz 
 'x, y, z' 
 '-x, -y, -z' 
 
_cell_length_a                    13.123(2) 
_cell_length_b                    13.188(2) 
_cell_length_c                    19.257(3) 
_cell_angle_alpha                 73.751(2) 
_cell_angle_beta                  79.260(2) 
_cell_angle_gamma                 66.588(2) 
_cell_volume                      2925.5(8) 
_cell_formula_units_Z             2 
_cell_measurement_temperature     100 
_cell_measurement_reflns_used    9771
_cell_measurement_theta_min        2.25
_cell_measurement_theta_max       26.50
_exptl_crystal_description        'needle'
_exptl_crystal_colour             'colorless'
_exptl_crystal_size_max           0.15 
_exptl_crystal_size_mid           0.05 
_exptl_crystal_size_min           0.03 
_exptl_crystal_density_meas       ? 
_exptl_crystal_density_diffrn     1.323 
_exptl_crystal_density_method     'not measured' 
_exptl_crystal_F_000              1224 
_exptl_absorpt_coefficient_mu     0.198 
_exptl_absorpt_correction_type    empirical
_exptl_absorpt_correction_T_min   0.9709 
_exptl_absorpt_correction_T_max   0.9941 
_exptl_absorpt_process_details    
;
SADABS Sheldrick 1996
;
_exptl_special_details 
; 
 ? 
; 
 
_diffrn_ambient_temperature       100 
_diffrn_radiation_wavelength      0.71073 
_diffrn_radiation_type            MoK\a 
_diffrn_radiation_source          'sealed tube'
_diffrn_radiation_monochromator   'graphite'
_diffrn_measurement_device_type   'Bruker APEXII CCD area detector' 
_diffrn_measurement_method        'phi and omega scans' 
_diffrn_detector_area_resol_mean  8.333
_diffrn_standards_number          ? 
_diffrn_standards_interval_count  ? 
_diffrn_standards_interval_time   ? 
_diffrn_standards_decay_%         ? 
_diffrn_reflns_number             29172 
_diffrn_reflns_av_R_equivalents   0.0266 
_diffrn_reflns_av_sigmaI/netI     0.0344 
_diffrn_reflns_limit_h_min        -16 
_diffrn_reflns_limit_h_max        16 
_diffrn_reflns_limit_k_min        -16 
_diffrn_reflns_limit_k_max        16 
_diffrn_reflns_limit_l_min        -24 
_diffrn_reflns_limit_l_max        24 
_diffrn_reflns_theta_min          1.11 
_diffrn_reflns_theta_max          26.77 
_reflns_number_total              11100 
_reflns_number_gt                 8831 
_reflns_threshold_expression      >2sigma(I) 
 
_computing_data_collection        'APEX2 (Bruker AXS, 2006)'
_computing_cell_refinement        'APEX2 (Bruker AXS, 2006)'
_computing_data_reduction         'SAINT (Bruker AXS, 2004)'
_computing_structure_solution     'SHELXS-97 (Sheldrick, 1997)'
_computing_structure_refinement   'SHELXL-97 (Sheldrick, 1997)'
_computing_molecular_graphics     'XSHEL (Bruker AXS,2002)'
_computing_publication_material   'XCIF (Bruker AXS, 2001)' 
_refine_special_details 
; 
 Refinement of F^2^ against ALL reflections.  The weighted R-factor wR and 
 goodness of fit S are based on F^2^, conventional R-factors R are based 
 on F, with F set to zero for negative F^2^. The threshold expression of 
 F^2^ > 2sigma(F^2^) is used only for calculating R-factors(gt) etc. and is 
 not relevant to the choice of reflections for refinement.  R-factors based 
 on F^2^ are statistically about twice as large as those based on F, and R- 
 factors based on ALL data will be even larger. 
; 
 
_refine_ls_structure_factor_coef  Fsqd  
_refine_ls_matrix_type            full 
_refine_ls_weighting_scheme       calc  
_refine_ls_weighting_details 
 'calc w=1/[\s^2^(Fo^2^)+(0.0460P)^2^+1.6320P] where P=(Fo^2^+2Fc^2^)/3' 
_atom_sites_solution_primary      direct 
_atom_sites_solution_secondary    difmap 
_atom_sites_solution_hydrogens    geom 
_refine_ls_hydrogen_treatment     mixed
_refine_ls_extinction_method      none 
_refine_ls_extinction_coef        ? 
_refine_ls_number_reflns          11100 
_refine_ls_number_parameters      756 
_refine_ls_number_restraints      0 
_refine_ls_R_factor_all           0.0531 
_refine_ls_R_factor_gt            0.0378 
_refine_ls_wR_factor_ref          0.1017 
_refine_ls_wR_factor_gt           0.0914 
_refine_ls_goodness_of_fit_ref    1.040 
_refine_ls_restrained_S_all       1.040 
_refine_ls_shift/su_max           0.001 
_refine_ls_shift/su_mean          0.000 
 
loop_ 
 _atom_site_label 
 _atom_site_type_symbol 
 _atom_site_fract_x 
 _atom_site_fract_y 
 _atom_site_fract_z 
 _atom_site_U_iso_or_equiv 
 _atom_site_adp_type 
 _atom_site_occupancy 
 _atom_site_symmetry_multiplicity 
 _atom_site_calc_flag 
 _atom_site_refinement_flags 
 _atom_site_disorder_assembly 
 _atom_site_disorder_group 
P1 P 0.25752(4) 0.11124(4) 0.37856(3) 0.01807(11) Uani 1 1 d . . . 
P2 P 0.20388(4) 0.49062(4) 0.18870(3) 0.01653(11) Uani 1 1 d . . . 
P3 P 0.57355(4) 0.25398(4) 0.28887(3) 0.01893(12) Uani 1 1 d . . . 
S1 S 0.77826(5) 0.43553(5) 0.36813(3) 0.03070(13) Uani 1 1 d . . . 
O5 O 0.32429(11) 0.46693(11) 0.18760(7) 0.0217(3) Uani 1 1 d . . . 
O1 O 0.75162(11) -0.21449(11) 0.18910(8) 0.0254(3) Uani 1 1 d . . . 
O6 O 0.53550(11) 0.16250(12) 0.33523(7) 0.0258(3) Uani 1 1 d . . . 
O4 O 0.17318(11) 0.20110(11) 0.33051(7) 0.0226(3) Uani 1 1 d . . . 
O2 O 0.13069(11) 0.03010(12) 0.10073(8) 0.0270(3) Uani 1 1 d . . . 
O3 O 0.51521(12) 0.36468(13) -0.09344(7) 0.0309(4) Uani 1 1 d . . . 
O7 O 0.76595(15) 0.46724(14) 0.43852(8) 0.0414(4) Uani 1 1 d . . . 
N2 N 0.37127(13) 0.30917(13) -0.03818(8) 0.0184(3) Uani 1 1 d . . . 
N6 N 0.53846(15) 0.30837(15) 0.20443(9) 0.0215(4) Uani 1 1 d . . . 
N3 N 0.71625(13) -0.03915(13) 0.11472(8) 0.0188(3) Uani 1 1 d . . . 
N5 N 0.16878(13) 0.37920(13) 0.19479(9) 0.0187(3) Uani 1 1 d . . . 
N1 N 0.29247(13) -0.06458(13) 0.15452(8) 0.0184(3) Uani 1 1 d . . . 
N4 N 0.38717(14) 0.05742(14) 0.34271(9) 0.0195(4) Uani 1 1 d . . . 
C1 C 0.68615(15) -0.11742(16) 0.16779(10) 0.0181(4) Uani 1 1 d . . . 
C11 C 0.20996(15) 0.31159(15) 0.14244(10) 0.0168(4) Uani 1 1 d . . . 
C6 C 0.37663(15) -0.05916(15) 0.19064(10) 0.0172(4) Uani 1 1 d . . . 
C5 C 0.34303(15) -0.01452(15) 0.25199(10) 0.0177(4) Uani 1 1 d . . . 
H5 H 0.2676 0.0051 0.2716 0.021 Uiso 1 1 calc R . . 
C8 C 0.21292(15) 0.03148(16) 0.12134(10) 0.0183(4) Uani 1 1 d . . . 
C9 C 0.23318(15) 0.14098(15) 0.10688(10) 0.0174(4) Uani 1 1 d . . . 
C4 C 0.41982(16) 0.00170(15) 0.28495(10) 0.0172(4) Uani 1 1 d . . . 
C17 C 0.51874(15) 0.30921(16) 0.08236(10) 0.0186(4) Uani 1 1 d . . . 
H17 H 0.4772 0.3885 0.0743 0.022 Uiso 1 1 calc R . . 
C14 C 0.29396(15) 0.17168(16) 0.04248(10) 0.0178(4) Uani 1 1 d . . . 
H14 H 0.3229 0.1243 0.0088 0.021 Uiso 1 1 calc R . . 
C7 C 0.48737(15) -0.09327(15) 0.16273(10) 0.0181(4) Uani 1 1 d . . . 
H7 H 0.5098 -0.1242 0.1209 0.022 Uiso 1 1 calc R . . 
C18 C 0.56535(15) 0.25083(16) 0.14803(10) 0.0187(4) Uani 1 1 d . . . 
C19 C 0.63379(15) 0.13665(16) 0.15660(10) 0.0186(4) Uani 1 1 d . . . 
H19 H 0.6709 0.0972 0.1997 0.022 Uiso 1 1 calc R . . 
C3 C 0.53163(15) -0.03573(15) 0.25837(10) 0.0182(4) Uani 1 1 d . . . 
H3 H 0.5856 -0.0300 0.2823 0.022 Uiso 1 1 calc R . . 
C2 C 0.56502(15) -0.08130(15) 0.19729(10) 0.0179(4) Uani 1 1 d . . . 
C20 C 0.64788(15) 0.08050(16) 0.10229(10) 0.0179(4) Uani 1 1 d . . . 
C21 C 0.59765(15) 0.13699(16) 0.03801(10) 0.0188(4) Uani 1 1 d . . . 
H21 H 0.6073 0.0980 0.0012 0.023 Uiso 1 1 calc R . . 
C15 C 0.47309(16) 0.31484(16) -0.03965(10) 0.0192(4) Uani 1 1 d . . . 
C13 C 0.31128(15) 0.27289(16) 0.02863(10) 0.0177(4) Uani 1 1 d . . . 
C10 C 0.19028(15) 0.21083(15) 0.15595(10) 0.0173(4) Uani 1 1 d . . . 
H10 H 0.1473 0.1899 0.1990 0.021 Uiso 1 1 calc R . . 
C12 C 0.26981(15) 0.34230(16) 0.07767(10) 0.0179(4) Uani 1 1 d . . . 
H12 H 0.2823 0.4115 0.0670 0.021 Uiso 1 1 calc R . . 
C16 C 0.53252(15) 0.25243(16) 0.02841(10) 0.0185(4) Uani 1 1 d . . . 
C26 C 0.83346(16) -0.07050(18) 0.08348(11) 0.0249(4) Uani 1 1 d . . . 
H26A H 0.8362 -0.0234 0.0336 0.030 Uiso 1 1 calc R . . 
H26B H 0.8626 -0.1509 0.0802 0.030 Uiso 1 1 calc R . . 
C22 C 0.27573(17) -0.17350(16) 0.17040(12) 0.0249(4) Uani 1 1 d . . . 
H22A H 0.3492 -0.2365 0.1734 0.030 Uiso 1 1 calc R . . 
H22B H 0.2396 -0.1749 0.1301 0.030 Uiso 1 1 calc R . . 
C24 C 0.30550(16) 0.36861(17) -0.10158(10) 0.0220(4) Uani 1 1 d . . . 
H24A H 0.2673 0.3211 -0.1083 0.026 Uiso 1 1 calc R . . 
H24B H 0.3564 0.3793 -0.1456 0.026 Uiso 1 1 calc R . . 
C23 C 0.2047(2) -0.19175(19) 0.24055(14) 0.0376(6) Uani 1 1 d . . . 
H23A H 0.2386 -0.1874 0.2804 0.056 Uiso 1 1 calc R . . 
H23B H 0.1996 -0.2667 0.2504 0.056 Uiso 1 1 calc R . . 
H23C H 0.1299 -0.1330 0.2364 0.056 Uiso 1 1 calc R . . 
C25 C 0.2193(2) 0.48342(18) -0.09325(12) 0.0340(5) Uani 1 1 d . . . 
H25A H 0.1680 0.4732 -0.0502 0.051 Uiso 1 1 calc R . . 
H25B H 0.1774 0.5197 -0.1364 0.051 Uiso 1 1 calc R . . 
H25C H 0.2568 0.5315 -0.0878 0.051 Uiso 1 1 calc R . . 
C27 C 0.90781(18) -0.0547(2) 0.12802(13) 0.0333(5) Uani 1 1 d . . . 
H27A H 0.8795 0.0247 0.1315 0.050 Uiso 1 1 calc R . . 
H27B H 0.9839 -0.0750 0.1045 0.050 Uiso 1 1 calc R . . 
H27C H 0.9080 -0.1037 0.1768 0.050 Uiso 1 1 calc R . . 
C34 C 0.27792(16) 0.16068(17) 0.45135(10) 0.0207(4) Uani 1 1 d . . . 
C28 C 0.21845(16) -0.01095(17) 0.41755(10) 0.0214(4) Uani 1 1 d . . . 
C46 C 0.12651(16) 0.55090(16) 0.26466(10) 0.0189(4) Uani 1 1 d . . . 
C40 C 0.14850(15) 0.58988(15) 0.10697(10) 0.0184(4) Uani 1 1 d . . . 
C51 C 0.01733(17) 0.62944(17) 0.26145(11) 0.0244(4) Uani 1 1 d . . . 
H51 H -0.0220 0.6464 0.2204 0.029 Uiso 1 1 calc R . . 
C41 C 0.20877(16) 0.65711(16) 0.06697(11) 0.0217(4) Uani 1 1 d . . . 
H41 H 0.2767 0.6485 0.0828 0.026 Uiso 1 1 calc R . . 
C49 C 0.02369(19) 0.65831(19) 0.37818(12) 0.0312(5) Uani 1 1 d . . . 
H49 H -0.0116 0.6950 0.4170 0.037 Uiso 1 1 calc R . . 
C38 C 0.23152(19) 0.31272(19) 0.51147(12) 0.0313(5) Uani 1 1 d . . . 
H38 H 0.1885 0.3886 0.5152 0.038 Uiso 1 1 calc R . . 
C39 C 0.21546(17) 0.27186(17) 0.45687(11) 0.0263(5) Uani 1 1 d . . . 
H39 H 0.1617 0.3199 0.4233 0.032 Uiso 1 1 calc R . . 
C43 C 0.07029(18) 0.74926(17) -0.01930(11) 0.0297(5) Uani 1 1 d . . . 
H43 H 0.0426 0.8051 -0.0617 0.036 Uiso 1 1 calc R . . 
C45 C 0.05022(16) 0.60113(17) 0.08233(11) 0.0227(4) Uani 1 1 d . . . 
H45 H 0.0098 0.5545 0.1087 0.027 Uiso 1 1 calc R . . 
C50 C -0.03382(18) 0.68281(18) 0.31839(12) 0.0303(5) Uani 1 1 d . . . 
H50 H -0.1082 0.7361 0.3164 0.036 Uiso 1 1 calc R . . 
C42 C 0.16910(18) 0.73653(17) 0.00401(11) 0.0285(5) Uani 1 1 d . . . 
H42 H 0.2100 0.7823 -0.0232 0.034 Uiso 1 1 calc R . . 
C35 C 0.35553(19) 0.09097(19) 0.50136(11) 0.0316(5) Uani 1 1 d . . . 
H35 H 0.3980 0.0146 0.4984 0.038 Uiso 1 1 calc R . . 
C30 C 0.2600(2) -0.20642(19) 0.48209(12) 0.0355(5) Uani 1 1 d . . . 
H30 H 0.3110 -0.2765 0.5063 0.043 Uiso 1 1 calc R . . 
C32 C 0.0770(2) -0.0928(2) 0.44422(12) 0.0379(6) Uani 1 1 d . . . 
H32 H 0.0026 -0.0853 0.4419 0.045 Uiso 1 1 calc R . . 
C44 C 0.01138(17) 0.68077(18) 0.01903(11) 0.0274(5) Uani 1 1 d . . . 
H44 H -0.0553 0.6882 0.0021 0.033 Uiso 1 1 calc R . . 
C36 C 0.3710(2) 0.1329(2) 0.55542(12) 0.0365(6) Uani 1 1 d . . . 
H36 H 0.4242 0.0850 0.5894 0.044 Uiso 1 1 calc R . . 
C48 C 0.13188(19) 0.58104(19) 0.38170(12) 0.0303(5) Uani 1 1 d . . . 
H48 H 0.1708 0.5645 0.4229 0.036 Uiso 1 1 calc R . . 
C47 C 0.18388(17) 0.52735(17) 0.32482(11) 0.0236(4) Uani 1 1 d . . . 
H47 H 0.2585 0.4746 0.3270 0.028 Uiso 1 1 calc R . . 
C33 C 0.10972(18) -0.00021(19) 0.41438(11) 0.0290(5) Uani 1 1 d . . . 
H33 H 0.0576 0.0704 0.3918 0.035 Uiso 1 1 calc R . . 
C31 C 0.1523(2) -0.1951(2) 0.47706(12) 0.0377(6) Uani 1 1 d . . . 
H31 H 0.1299 -0.2585 0.4964 0.045 Uiso 1 1 calc R . . 
C37 C 0.30970(19) 0.2434(2) 0.56025(12) 0.0326(5) Uani 1 1 d . . . 
H37 H 0.3213 0.2719 0.5971 0.039 Uiso 1 1 calc R . . 
C29 C 0.29353(19) -0.11475(18) 0.45155(12) 0.0295(5) Uani 1 1 d . . . 
H29 H 0.3682 -0.1229 0.4539 0.035 Uiso 1 1 calc R . . 
C52 C 0.72372(16) 0.19871(17) 0.27941(10) 0.0206(4) Uani 1 1 d . . . 
C57 C 0.78145(18) 0.08878(19) 0.31591(12) 0.0303(5) Uani 1 1 d . . . 
H57 H 0.7424 0.0463 0.3499 0.036 Uiso 1 1 calc R . . 
C53 C 0.78276(17) 0.26062(18) 0.23143(12) 0.0271(5) Uani 1 1 d . . . 
H53 H 0.7438 0.3359 0.2062 0.033 Uiso 1 1 calc R . . 
C54 C 0.89735(18) 0.2138(2) 0.22003(12) 0.0330(5) Uani 1 1 d . . . 
H54 H 0.9371 0.2573 0.1880 0.040 Uiso 1 1 calc R . . 
C55 C 0.95387(18) 0.1036(2) 0.25530(13) 0.0355(5) Uani 1 1 d . . . 
H55 H 1.0326 0.0709 0.2469 0.043 Uiso 1 1 calc R . . 
C56 C 0.89682(19) 0.0408(2) 0.30256(13) 0.0372(6) Uani 1 1 d . . . 
H56 H 0.9361 -0.0354 0.3262 0.045 Uiso 1 1 calc R . . 
C58 C 0.51970(16) 0.37917(17) 0.32476(11) 0.0221(4) Uani 1 1 d . . . 
C63 C 0.51197(17) 0.48640(17) 0.28170(12) 0.0271(5) Uani 1 1 d . . . 
H63 H 0.5362 0.4953 0.2315 0.032 Uiso 1 1 calc R . . 
C59 C 0.48250(18) 0.3675(2) 0.39831(12) 0.0309(5) Uani 1 1 d . . . 
H59 H 0.4866 0.2951 0.4277 0.037 Uiso 1 1 calc R . . 
C60 C 0.4394(2) 0.4620(2) 0.42851(14) 0.0426(6) Uani 1 1 d . . . 
H60 H 0.4141 0.4543 0.4786 0.051 Uiso 1 1 calc R . . 
C61 C 0.4334(2) 0.5669(2) 0.38556(15) 0.0450(7) Uani 1 1 d . . . 
H61 H 0.4047 0.6311 0.4065 0.054 Uiso 1 1 calc R . . 
C62 C 0.46872(19) 0.5796(2) 0.31276(14) 0.0375(6) Uani 1 1 d . . . 
H62 H 0.4634 0.6525 0.2837 0.045 Uiso 1 1 calc R . . 
C64 C 0.7484(2) 0.5646(2) 0.30021(13) 0.0407(6) Uani 1 1 d . . . 
H64A H 0.6698 0.6127 0.3074 0.061 Uiso 1 1 calc R . . 
H64B H 0.7633 0.5476 0.2521 0.061 Uiso 1 1 calc R . . 
H64C H 0.7955 0.6045 0.3038 0.061 Uiso 1 1 calc R . . 
C65 C 0.9241(2) 0.3795(2) 0.34336(15) 0.0482(7) Uani 1 1 d . . . 
H65A H 0.9585 0.4300 0.3491 0.072 Uiso 1 1 calc R . . 
H65B H 0.9367 0.3734 0.2927 0.072 Uiso 1 1 calc R . . 
H65C H 0.9573 0.3041 0.3747 0.072 Uiso 1 1 calc R . . 
H6N H 0.4813(18) 0.3598(19) 0.2015(11) 0.018(6) Uiso 1 1 d . . . 
H5N H 0.1633(17) 0.3395(19) 0.2391(12) 0.024(6) Uiso 1 1 d . . . 
H4N H 0.427(2) 0.090(2) 0.3459(13) 0.038(7) Uiso 1 1 d . . . 
 
loop_ 
 _atom_site_aniso_label 
 _atom_site_aniso_U_11 
 _atom_site_aniso_U_22 
 _atom_site_aniso_U_33 
 _atom_site_aniso_U_23 
 _atom_site_aniso_U_13 
 _atom_site_aniso_U_12 
P1 0.0193(3) 0.0181(3) 0.0166(2) -0.0039(2) -0.00004(19) -0.0072(2) 
P2 0.0174(2) 0.0139(2) 0.0183(2) -0.00349(19) -0.00102(19) -0.0061(2) 
P3 0.0180(3) 0.0217(3) 0.0188(3) -0.0057(2) -0.0015(2) -0.0083(2) 
S1 0.0357(3) 0.0285(3) 0.0307(3) -0.0083(2) 0.0017(2) -0.0156(2) 
O5 0.0196(7) 0.0198(7) 0.0247(7) -0.0048(6) -0.0022(6) -0.0062(6) 
O1 0.0204(7) 0.0168(7) 0.0344(8) -0.0044(6) -0.0027(6) -0.0031(6) 
O6 0.0271(8) 0.0294(8) 0.0253(8) -0.0036(6) -0.0018(6) -0.0168(6) 
O4 0.0226(7) 0.0228(7) 0.0219(7) -0.0039(6) -0.0024(6) -0.0085(6) 
O2 0.0236(8) 0.0245(8) 0.0376(9) -0.0044(6) -0.0108(6) -0.0118(6) 
O3 0.0272(8) 0.0430(9) 0.0208(8) 0.0032(7) -0.0008(6) -0.0186(7) 
O7 0.0566(11) 0.0362(9) 0.0268(9) -0.0097(7) 0.0031(8) -0.0135(8) 
N2 0.0205(8) 0.0203(8) 0.0145(8) -0.0022(6) -0.0013(6) -0.0089(7) 
N6 0.0193(9) 0.0198(9) 0.0223(9) -0.0090(7) -0.0032(7) -0.0007(8) 
N3 0.0159(8) 0.0178(8) 0.0206(8) -0.0058(7) 0.0011(6) -0.0043(7) 
N5 0.0243(9) 0.0153(8) 0.0170(9) -0.0028(7) 0.0010(7) -0.0097(7) 
N1 0.0195(8) 0.0160(8) 0.0234(9) -0.0054(7) -0.0037(7) -0.0089(7) 
N4 0.0198(9) 0.0237(9) 0.0193(9) -0.0075(7) -0.0008(7) -0.0110(7) 
C1 0.0188(10) 0.0179(10) 0.0205(10) -0.0084(8) -0.0034(8) -0.0062(8) 
C11 0.0162(9) 0.0161(9) 0.0173(9) -0.0030(7) -0.0031(7) -0.0049(8) 
C6 0.0206(10) 0.0138(9) 0.0191(10) -0.0011(7) -0.0050(8) -0.0085(8) 
C5 0.0162(9) 0.0159(9) 0.0200(10) -0.0006(8) -0.0020(7) -0.0071(8) 
C8 0.0187(10) 0.0200(10) 0.0179(9) -0.0060(8) -0.0003(8) -0.0084(8) 
C9 0.0161(9) 0.0163(9) 0.0205(10) -0.0008(8) -0.0068(8) -0.0066(8) 
C4 0.0218(10) 0.0166(9) 0.0135(9) -0.0016(7) -0.0008(7) -0.0090(8) 
C17 0.0155(9) 0.0167(10) 0.0218(10) -0.0036(8) -0.0007(8) -0.0049(8) 
C14 0.0170(9) 0.0179(10) 0.0189(10) -0.0059(8) -0.0031(7) -0.0050(8) 
C7 0.0213(10) 0.0142(9) 0.0187(10) -0.0037(7) -0.0020(8) -0.0063(8) 
C18 0.0149(9) 0.0227(10) 0.0192(10) -0.0071(8) 0.0016(7) -0.0074(8) 
C19 0.0156(9) 0.0208(10) 0.0178(10) -0.0027(8) -0.0016(7) -0.0063(8) 
C3 0.0192(10) 0.0186(10) 0.0188(9) -0.0026(8) -0.0050(8) -0.0086(8) 
C2 0.0187(10) 0.0132(9) 0.0205(10) -0.0008(8) -0.0028(8) -0.0061(8) 
C20 0.0138(9) 0.0180(10) 0.0215(10) -0.0043(8) 0.0018(7) -0.0069(8) 
C21 0.0182(10) 0.0233(10) 0.0175(10) -0.0068(8) 0.0018(8) -0.0102(8) 
C15 0.0198(10) 0.0192(10) 0.0173(10) -0.0045(8) 0.0006(8) -0.0067(8) 
C13 0.0154(9) 0.0208(10) 0.0162(9) -0.0017(8) -0.0030(7) -0.0069(8) 
C10 0.0168(9) 0.0173(9) 0.0169(9) -0.0004(7) -0.0023(7) -0.0071(8) 
C12 0.0191(10) 0.0155(9) 0.0192(10) -0.0012(8) -0.0041(8) -0.0073(8) 
C16 0.0164(9) 0.0225(10) 0.0168(9) -0.0026(8) 0.0019(7) -0.0101(8) 
C26 0.0160(10) 0.0246(11) 0.0298(11) -0.0079(9) 0.0044(8) -0.0047(9) 
C22 0.0271(11) 0.0149(10) 0.0370(12) -0.0073(9) -0.0085(9) -0.0086(9) 
C24 0.0250(11) 0.0261(11) 0.0159(10) -0.0026(8) -0.0037(8) -0.0110(9) 
C23 0.0382(13) 0.0228(12) 0.0531(15) -0.0027(11) 0.0007(11) -0.0186(10) 
C25 0.0431(14) 0.0241(11) 0.0288(12) 0.0005(9) -0.0135(10) -0.0057(10) 
C27 0.0212(11) 0.0337(13) 0.0444(14) -0.0069(11) -0.0027(10) -0.0109(10) 
C34 0.0223(10) 0.0227(10) 0.0173(10) -0.0052(8) 0.0022(8) -0.0096(8) 
C28 0.0262(11) 0.0217(10) 0.0169(10) -0.0065(8) 0.0037(8) -0.0104(9) 
C46 0.0227(10) 0.0155(9) 0.0210(10) -0.0037(8) 0.0020(8) -0.0117(8) 
C40 0.0191(9) 0.0144(9) 0.0202(10) -0.0055(8) -0.0002(8) -0.0041(8) 
C51 0.0237(11) 0.0236(11) 0.0278(11) -0.0083(9) 0.0011(9) -0.0103(9) 
C41 0.0233(10) 0.0173(10) 0.0244(10) -0.0050(8) -0.0001(8) -0.0080(8) 
C49 0.0362(13) 0.0322(12) 0.0316(12) -0.0176(10) 0.0104(10) -0.0180(11) 
C38 0.0354(13) 0.0278(12) 0.0326(12) -0.0153(10) 0.0032(10) -0.0104(10) 
C39 0.0284(11) 0.0233(11) 0.0252(11) -0.0053(9) -0.0013(9) -0.0079(9) 
C43 0.0349(12) 0.0185(11) 0.0234(11) -0.0011(9) -0.0036(9) 0.0008(9) 
C45 0.0197(10) 0.0209(10) 0.0260(11) -0.0065(8) -0.0008(8) -0.0057(8) 
C50 0.0251(11) 0.0270(12) 0.0382(13) -0.0127(10) 0.0065(9) -0.0095(9) 
C42 0.0340(12) 0.0184(10) 0.0285(12) -0.0010(9) 0.0004(9) -0.0089(9) 
C35 0.0369(13) 0.0282(12) 0.0248(11) -0.0110(9) -0.0060(9) -0.0020(10) 
C30 0.0497(15) 0.0225(11) 0.0298(12) -0.0036(9) 0.0027(11) -0.0129(11) 
C32 0.0467(14) 0.0454(15) 0.0330(13) -0.0049(11) -0.0016(11) -0.0322(12) 
C44 0.0206(10) 0.0278(11) 0.0283(11) -0.0087(9) -0.0055(9) -0.0001(9) 
C36 0.0382(13) 0.0430(14) 0.0243(12) -0.0118(10) -0.0084(10) -0.0054(11) 
C48 0.0397(13) 0.0321(12) 0.0252(11) -0.0090(9) -0.0006(10) -0.0187(11) 
C47 0.0267(11) 0.0200(10) 0.0236(11) -0.0032(8) -0.0009(8) -0.0100(9) 
C33 0.0309(12) 0.0311(12) 0.0278(11) -0.0053(9) -0.0007(9) -0.0160(10) 
C31 0.0628(17) 0.0337(13) 0.0261(12) -0.0047(10) 0.0037(11) -0.0320(13) 
C37 0.0374(13) 0.0425(14) 0.0239(11) -0.0171(10) 0.0030(10) -0.0167(11) 
C29 0.0308(12) 0.0248(11) 0.0297(12) -0.0048(9) 0.0017(9) -0.0097(10) 
C52 0.0196(10) 0.0232(10) 0.0209(10) -0.0069(8) -0.0040(8) -0.0075(8) 
C57 0.0274(11) 0.0311(12) 0.0311(12) 0.0006(10) -0.0084(9) -0.0119(10) 
C53 0.0243(11) 0.0257(11) 0.0304(12) -0.0053(9) -0.0001(9) -0.0097(9) 
C54 0.0259(11) 0.0388(13) 0.0360(13) -0.0095(10) 0.0019(10) -0.0151(10) 
C55 0.0206(11) 0.0386(14) 0.0456(14) -0.0148(11) -0.0034(10) -0.0052(10) 
C56 0.0274(12) 0.0303(12) 0.0465(14) -0.0004(11) -0.0146(11) -0.0036(10) 
C58 0.0159(9) 0.0279(11) 0.0257(11) -0.0118(9) -0.0025(8) -0.0072(8) 
C63 0.0253(11) 0.0264(11) 0.0315(12) -0.0106(9) -0.0042(9) -0.0080(9) 
C59 0.0281(11) 0.0438(14) 0.0247(11) -0.0135(10) -0.0008(9) -0.0140(10) 
C60 0.0349(13) 0.0651(18) 0.0326(13) -0.0296(13) 0.0018(10) -0.0129(13) 
C61 0.0356(14) 0.0459(16) 0.0589(17) -0.0378(14) -0.0086(12) -0.0011(12) 
C62 0.0349(13) 0.0279(12) 0.0519(16) -0.0177(11) -0.0126(11) -0.0040(10) 
C64 0.0485(15) 0.0399(14) 0.0336(13) 0.0009(11) -0.0108(11) -0.0189(12) 
C65 0.0377(14) 0.0431(15) 0.0526(17) -0.0114(13) 0.0061(12) -0.0072(12) 
 
_geom_special_details 
; 
 All esds (except the esd in the dihedral angle between two l.s. planes) 
 are estimated using the full covariance matrix.  The cell esds are taken 
 into account individually in the estimation of esds in distances, angles 
 and torsion angles; correlations between esds in cell parameters are only 
 used when they are defined by crystal symmetry.  An approximate (isotropic) 
 treatment of cell esds is used for estimating esds involving l.s. planes. 
; 
 
loop_ 
 _geom_bond_atom_site_label_1 
 _geom_bond_atom_site_label_2 
 _geom_bond_distance 
 _geom_bond_site_symmetry_2 
 _geom_bond_publ_flag 
P1 O4 1.4871(14) . ? 
P1 N4 1.6590(17) . ? 
P1 C34 1.803(2) . ? 
P1 C28 1.805(2) . ? 
P2 O5 1.4813(14) . ? 
P2 N5 1.6752(16) . ? 
P2 C40 1.7990(19) . ? 
P2 C46 1.805(2) . ? 
P3 O6 1.4871(14) . ? 
P3 N6 1.6537(17) . ? 
P3 C58 1.798(2) . ? 
P3 C52 1.802(2) . ? 
S1 O7 1.4901(17) . ? 
S1 C65 1.780(3) . ? 
S1 C64 1.782(2) . ? 
O1 C1 1.228(2) . ? 
O2 C8 1.225(2) . ? 
O3 C15 1.227(2) . ? 
N2 C15 1.362(2) . ? 
N2 C13 1.443(2) . ? 
N2 C24 1.473(2) . ? 
N6 C18 1.409(2) . ? 
N6 H6N 0.78(2) . ? 
N3 C1 1.360(2) . ? 
N3 C20 1.448(2) . ? 
N3 C26 1.479(2) . ? 
N5 C11 1.421(2) . ? 
N5 H5N 0.87(2) . ? 
N1 C8 1.359(2) . ? 
N1 C6 1.444(2) . ? 
N1 C22 1.478(2) . ? 
N4 C4 1.411(2) . ? 
N4 H4N 0.82(3) . ? 
C1 C2 1.513(3) . ? 
C11 C12 1.393(3) . ? 
C11 C10 1.398(3) . ? 
C6 C5 1.388(3) . ? 
C6 C7 1.388(3) . ? 
C5 C4 1.396(3) . ? 
C5 H5 0.9500 . ? 
C8 C9 1.512(3) . ? 
C9 C10 1.391(3) . ? 
C9 C14 1.395(3) . ? 
C4 C3 1.394(3) . ? 
C17 C16 1.389(3) . ? 
C17 C18 1.391(3) . ? 
C17 H17 0.9500 . ? 
C14 C13 1.387(3) . ? 
C14 H14 0.9500 . ? 
C7 C2 1.395(3) . ? 
C7 H7 0.9500 . ? 
C18 C19 1.394(3) . ? 
C19 C20 1.389(3) . ? 
C19 H19 0.9500 . ? 
C3 C2 1.390(3) . ? 
C3 H3 0.9500 . ? 
C20 C21 1.386(3) . ? 
C21 C16 1.396(3) . ? 
C21 H21 0.9500 . ? 
C15 C16 1.507(3) . ? 
C13 C12 1.386(3) . ? 
C10 H10 0.9500 . ? 
C12 H12 0.9500 . ? 
C26 C27 1.518(3) . ? 
C26 H26A 0.9900 . ? 
C26 H26B 0.9900 . ? 
C22 C23 1.509(3) . ? 
C22 H22A 0.9900 . ? 
C22 H22B 0.9900 . ? 
C24 C25 1.518(3) . ? 
C24 H24A 0.9900 . ? 
C24 H24B 0.9900 . ? 
C23 H23A 0.9800 . ? 
C23 H23B 0.9800 . ? 
C23 H23C 0.9800 . ? 
C25 H25A 0.9800 . ? 
C25 H25B 0.9800 . ? 
C25 H25C 0.9800 . ? 
C27 H27A 0.9800 . ? 
C27 H27B 0.9800 . ? 
C27 H27C 0.9800 . ? 
C34 C39 1.390(3) . ? 
C34 C35 1.391(3) . ? 
C28 C33 1.388(3) . ? 
C28 C29 1.393(3) . ? 
C46 C47 1.394(3) . ? 
C46 C51 1.395(3) . ? 
C40 C45 1.395(3) . ? 
C40 C41 1.398(3) . ? 
C51 C50 1.389(3) . ? 
C51 H51 0.9500 . ? 
C41 C42 1.389(3) . ? 
C41 H41 0.9500 . ? 
C49 C48 1.381(3) . ? 
C49 C50 1.386(3) . ? 
C49 H49 0.9500 . ? 
C38 C37 1.380(3) . ? 
C38 C39 1.389(3) . ? 
C38 H38 0.9500 . ? 
C39 H39 0.9500 . ? 
C43 C42 1.383(3) . ? 
C43 C44 1.388(3) . ? 
C43 H43 0.9500 . ? 
C45 C44 1.392(3) . ? 
C45 H45 0.9500 . ? 
C50 H50 0.9500 . ? 
C42 H42 0.9500 . ? 
C35 C36 1.385(3) . ? 
C35 H35 0.9500 . ? 
C30 C31 1.381(3) . ? 
C30 C29 1.389(3) . ? 
C30 H30 0.9500 . ? 
C32 C31 1.376(3) . ? 
C32 C33 1.391(3) . ? 
C32 H32 0.9500 . ? 
C44 H44 0.9500 . ? 
C36 C37 1.378(3) . ? 
C36 H36 0.9500 . ? 
C48 C47 1.392(3) . ? 
C48 H48 0.9500 . ? 
C47 H47 0.9500 . ? 
C33 H33 0.9500 . ? 
C31 H31 0.9500 . ? 
C37 H37 0.9500 . ? 
C29 H29 0.9500 . ? 
C52 C57 1.387(3) . ? 
C52 C53 1.391(3) . ? 
C57 C56 1.394(3) . ? 
C57 H57 0.9500 . ? 
C53 C54 1.381(3) . ? 
C53 H53 0.9500 . ? 
C54 C55 1.379(3) . ? 
C54 H54 0.9500 . ? 
C55 C56 1.375(3) . ? 
C55 H55 0.9500 . ? 
C56 H56 0.9500 . ? 
C58 C59 1.396(3) . ? 
C58 C63 1.399(3) . ? 
C63 C62 1.386(3) . ? 
C63 H63 0.9500 . ? 
C59 C60 1.391(3) . ? 
C59 H59 0.9500 . ? 
C60 C61 1.379(4) . ? 
C60 H60 0.9500 . ? 
C61 C62 1.377(4) . ? 
C61 H61 0.9500 . ? 
C62 H62 0.9500 . ? 
C64 H64A 0.9800 . ? 
C64 H64B 0.9800 . ? 
C64 H64C 0.9800 . ? 
C65 H65A 0.9800 . ? 
C65 H65B 0.9800 . ? 
C65 H65C 0.9800 . ? 
 
loop_ 
 _geom_angle_atom_site_label_1 
 _geom_angle_atom_site_label_2 
 _geom_angle_atom_site_label_3 
 _geom_angle 
 _geom_angle_site_symmetry_1 
 _geom_angle_site_symmetry_3 
 _geom_angle_publ_flag 
O4 P1 N4 118.26(8) . . ? 
O4 P1 C34 112.37(9) . . ? 
N4 P1 C34 101.65(9) . . ? 
O4 P1 C28 111.18(9) . . ? 
N4 P1 C28 104.02(9) . . ? 
C34 P1 C28 108.47(9) . . ? 
O5 P2 N5 116.37(8) . . ? 
O5 P2 C40 110.72(8) . . ? 
N5 P2 C40 104.98(9) . . ? 
O5 P2 C46 110.96(8) . . ? 
N5 P2 C46 105.43(8) . . ? 
C40 P2 C46 107.86(9) . . ? 
O6 P3 N6 119.36(8) . . ? 
O6 P3 C58 112.27(9) . . ? 
N6 P3 C58 101.16(9) . . ? 
O6 P3 C52 108.34(9) . . ? 
N6 P3 C52 104.10(9) . . ? 
C58 P3 C52 111.20(9) . . ? 
O7 S1 C65 106.15(12) . . ? 
O7 S1 C64 106.17(11) . . ? 
C65 S1 C64 96.59(13) . . ? 
C15 N2 C13 122.17(15) . . ? 
C15 N2 C24 119.92(15) . . ? 
C13 N2 C24 115.94(15) . . ? 
C18 N6 P3 127.31(14) . . ? 
C18 N6 H6N 113.5(16) . . ? 
P3 N6 H6N 112.6(16) . . ? 
C1 N3 C20 121.60(15) . . ? 
C1 N3 C26 118.80(15) . . ? 
C20 N3 C26 117.32(15) . . ? 
C11 N5 P2 122.35(13) . . ? 
C11 N5 H5N 113.0(14) . . ? 
P2 N5 H5N 114.1(14) . . ? 
C8 N1 C6 121.09(15) . . ? 
C8 N1 C22 118.81(15) . . ? 
C6 N1 C22 118.19(15) . . ? 
C4 N4 P1 125.41(14) . . ? 
C4 N4 H4N 115.2(17) . . ? 
P1 N4 H4N 113.6(17) . . ? 
O1 C1 N3 122.55(17) . . ? 
O1 C1 C2 120.76(17) . . ? 
N3 C1 C2 116.61(16) . . ? 
C12 C11 C10 118.54(17) . . ? 
C12 C11 N5 122.13(16) . . ? 
C10 C11 N5 119.34(16) . . ? 
C5 C6 C7 121.10(17) . . ? 
C5 C6 N1 118.19(16) . . ? 
C7 C6 N1 120.66(17) . . ? 
C6 C5 C4 120.20(17) . . ? 
C6 C5 H5 119.9 . . ? 
C4 C5 H5 119.9 . . ? 
O2 C8 N1 122.29(17) . . ? 
O2 C8 C9 120.71(17) . . ? 
N1 C8 C9 116.91(15) . . ? 
C10 C9 C14 120.64(17) . . ? 
C10 C9 C8 120.82(16) . . ? 
C14 C9 C8 118.53(17) . . ? 
C3 C4 C5 118.68(17) . . ? 
C3 C4 N4 119.28(16) . . ? 
C5 C4 N4 122.02(17) . . ? 
C16 C17 C18 120.50(18) . . ? 
C16 C17 H17 119.8 . . ? 
C18 C17 H17 119.7 . . ? 
C13 C14 C9 118.61(17) . . ? 
C13 C14 H14 120.7 . . ? 
C9 C14 H14 120.7 . . ? 
C6 C7 C2 118.76(17) . . ? 
C6 C7 H7 120.6 . . ? 
C2 C7 H7 120.6 . . ? 
C17 C18 C19 118.96(17) . . ? 
C17 C18 N6 118.69(17) . . ? 
C19 C18 N6 122.32(17) . . ? 
C20 C19 C18 120.09(17) . . ? 
C20 C19 H19 120.0 . . ? 
C18 C19 H19 120.0 . . ? 
C2 C3 C4 120.74(17) . . ? 
C2 C3 H3 119.6 . . ? 
C4 C3 H3 119.6 . . ? 
C3 C2 C7 120.37(17) . . ? 
C3 C2 C1 119.84(16) . . ? 
C7 C2 C1 119.79(17) . . ? 
C21 C20 C19 121.11(18) . . ? 
C21 C20 N3 120.71(17) . . ? 
C19 C20 N3 118.18(17) . . ? 
C20 C21 C16 118.68(17) . . ? 
C20 C21 H21 120.7 . . ? 
C16 C21 H21 120.7 . . ? 
O3 C15 N2 122.37(17) . . ? 
O3 C15 C16 122.03(17) . . ? 
N2 C15 C16 115.57(16) . . ? 
C12 C13 C14 121.05(17) . . ? 
C12 C13 N2 118.57(16) . . ? 
C14 C13 N2 120.37(17) . . ? 
C9 C10 C11 120.50(17) . . ? 
C9 C10 H10 119.7 . . ? 
C11 C10 H10 119.7 . . ? 
C13 C12 C11 120.62(17) . . ? 
C13 C12 H12 119.7 . . ? 
C11 C12 H12 119.7 . . ? 
C17 C16 C21 120.46(17) . . ? 
C17 C16 C15 119.71(17) . . ? 
C21 C16 C15 119.78(17) . . ? 
N3 C26 C27 112.74(17) . . ? 
N3 C26 H26A 109.0 . . ? 
C27 C26 H26A 109.0 . . ? 
N3 C26 H26B 109.0 . . ? 
C27 C26 H26B 109.0 . . ? 
H26A C26 H26B 107.8 . . ? 
N1 C22 C23 112.23(17) . . ? 
N1 C22 H22A 109.2 . . ? 
C23 C22 H22A 109.2 . . ? 
N1 C22 H22B 109.2 . . ? 
C23 C22 H22B 109.2 . . ? 
H22A C22 H22B 107.9 . . ? 
N2 C24 C25 112.21(16) . . ? 
N2 C24 H24A 109.2 . . ? 
C25 C24 H24A 109.2 . . ? 
N2 C24 H24B 109.2 . . ? 
C25 C24 H24B 109.2 . . ? 
H24A C24 H24B 107.9 . . ? 
C22 C23 H23A 109.5 . . ? 
C22 C23 H23B 109.5 . . ? 
H23A C23 H23B 109.5 . . ? 
C22 C23 H23C 109.5 . . ? 
H23A C23 H23C 109.5 . . ? 
H23B C23 H23C 109.5 . . ? 
C24 C25 H25A 109.5 . . ? 
C24 C25 H25B 109.5 . . ? 
H25A C25 H25B 109.5 . . ? 
C24 C25 H25C 109.5 . . ? 
H25A C25 H25C 109.5 . . ? 
H25B C25 H25C 109.5 . . ? 
C26 C27 H27A 109.5 . . ? 
C26 C27 H27B 109.5 . . ? 
H27A C27 H27B 109.5 . . ? 
C26 C27 H27C 109.5 . . ? 
H27A C27 H27C 109.5 . . ? 
H27B C27 H27C 109.5 . . ? 
C39 C34 C35 119.31(19) . . ? 
C39 C34 P1 118.99(15) . . ? 
C35 C34 P1 121.70(15) . . ? 
C33 C28 C29 119.23(19) . . ? 
C33 C28 P1 118.76(16) . . ? 
C29 C28 P1 122.00(16) . . ? 
C47 C46 C51 119.64(18) . . ? 
C47 C46 P2 117.53(15) . . ? 
C51 C46 P2 122.38(15) . . ? 
C45 C40 C41 119.67(18) . . ? 
C45 C40 P2 123.03(15) . . ? 
C41 C40 P2 117.30(15) . . ? 
C50 C51 C46 119.91(19) . . ? 
C50 C51 H51 120.0 . . ? 
C46 C51 H51 120.0 . . ? 
C42 C41 C40 119.84(19) . . ? 
C42 C41 H41 120.1 . . ? 
C40 C41 H41 120.1 . . ? 
C48 C49 C50 120.5(2) . . ? 
C48 C49 H49 119.8 . . ? 
C50 C49 H49 119.8 . . ? 
C37 C38 C39 120.2(2) . . ? 
C37 C38 H38 119.9 . . ? 
C39 C38 H38 119.9 . . ? 
C38 C39 C34 120.1(2) . . ? 
C38 C39 H39 120.0 . . ? 
C34 C39 H39 120.0 . . ? 
C42 C43 C44 120.26(19) . . ? 
C42 C43 H43 119.9 . . ? 
C44 C43 H43 119.9 . . ? 
C44 C45 C40 120.00(19) . . ? 
C44 C45 H45 120.0 . . ? 
C40 C45 H45 120.0 . . ? 
C49 C50 C51 120.0(2) . . ? 
C49 C50 H50 120.0 . . ? 
C51 C50 H50 120.0 . . ? 
C43 C42 C41 120.3(2) . . ? 
C43 C42 H42 119.9 . . ? 
C41 C42 H42 119.9 . . ? 
C36 C35 C34 120.1(2) . . ? 
C36 C35 H35 120.0 . . ? 
C34 C35 H35 120.0 . . ? 
C31 C30 C29 119.6(2) . . ? 
C31 C30 H30 120.2 . . ? 
C29 C30 H30 120.2 . . ? 
C31 C32 C33 120.1(2) . . ? 
C31 C32 H32 119.9 . . ? 
C33 C32 H32 119.9 . . ? 
C43 C44 C45 119.90(19) . . ? 
C43 C44 H44 120.1 . . ? 
C45 C44 H44 120.1 . . ? 
C37 C36 C35 120.4(2) . . ? 
C37 C36 H36 119.8 . . ? 
C35 C36 H36 119.8 . . ? 
C49 C48 C47 119.9(2) . . ? 
C49 C48 H48 120.1 . . ? 
C47 C48 H48 120.1 . . ? 
C48 C47 C46 120.06(19) . . ? 
C48 C47 H47 120.0 . . ? 
C46 C47 H47 120.0 . . ? 
C28 C33 C32 120.1(2) . . ? 
C28 C33 H33 120.0 . . ? 
C32 C33 H33 120.0 . . ? 
C32 C31 C30 120.5(2) . . ? 
C32 C31 H31 119.8 . . ? 
C30 C31 H31 119.8 . . ? 
C36 C37 C38 119.9(2) . . ? 
C36 C37 H37 120.1 . . ? 
C38 C37 H37 120.1 . . ? 
C30 C29 C28 120.4(2) . . ? 
C30 C29 H29 119.8 . . ? 
C28 C29 H29 119.8 . . ? 
C57 C52 C53 119.16(19) . . ? 
C57 C52 P3 119.46(16) . . ? 
C53 C52 P3 121.15(15) . . ? 
C52 C57 C56 119.8(2) . . ? 
C52 C57 H57 120.1 . . ? 
C56 C57 H57 120.1 . . ? 
C54 C53 C52 120.7(2) . . ? 
C54 C53 H53 119.7 . . ? 
C52 C53 H53 119.7 . . ? 
C55 C54 C53 119.8(2) . . ? 
C55 C54 H54 120.1 . . ? 
C53 C54 H54 120.1 . . ? 
C56 C55 C54 120.3(2) . . ? 
C56 C55 H55 119.8 . . ? 
C54 C55 H55 119.8 . . ? 
C55 C56 C57 120.1(2) . . ? 
C55 C56 H56 119.9 . . ? 
C57 C56 H56 119.9 . . ? 
C59 C58 C63 119.63(19) . . ? 
C59 C58 P3 117.74(16) . . ? 
C63 C58 P3 122.62(15) . . ? 
C62 C63 C58 119.6(2) . . ? 
C62 C63 H63 120.2 . . ? 
C58 C63 H63 120.2 . . ? 
C60 C59 C58 119.9(2) . . ? 
C60 C59 H59 120.0 . . ? 
C58 C59 H59 120.0 . . ? 
C61 C60 C59 119.8(2) . . ? 
C61 C60 H60 120.1 . . ? 
C59 C60 H60 120.1 . . ? 
C62 C61 C60 120.8(2) . . ? 
C62 C61 H61 119.6 . . ? 
C60 C61 H61 119.6 . . ? 
C61 C62 C63 120.2(2) . . ? 
C61 C62 H62 119.9 . . ? 
C63 C62 H62 119.9 . . ? 
S1 C64 H64A 109.5 . . ? 
S1 C64 H64B 109.5 . . ? 
H64A C64 H64B 109.5 . . ? 
S1 C64 H64C 109.5 . . ? 
H64A C64 H64C 109.5 . . ? 
H64B C64 H64C 109.5 . . ? 
S1 C65 H65A 109.5 . . ? 
S1 C65 H65B 109.5 . . ? 
H65A C65 H65B 109.5 . . ? 
S1 C65 H65C 109.5 . . ? 
H65A C65 H65C 109.5 . . ? 
H65B C65 H65C 109.5 . . ? 
 
_diffrn_measured_fraction_theta_max    0.889 
_diffrn_reflns_theta_full              25.50 
_diffrn_measured_fraction_theta_full   0.977 
_refine_diff_density_max    0.408 
_refine_diff_density_min   -0.496 
_refine_diff_density_rms    0.052 

#==END
